# Supplementary material
Source: PubMed Central journal article supplement (PMC6588468)
Supplement: NIHMS1523869-supplement-1.pdf [file NIHMS1523869-supplement-1.pdf]

**SUPPLEMENTARY FIGURES FOR:**  
**Molecular architecture, polar targeting and biogenesis  
of the *Legionella* Dot/Icm T4SS**

Running title: Structural analysis of the *Legionella* T4SS

**Debnath Ghosal<sup>1,#</sup>, KwangCheol C. Jeong<sup>2,3,#</sup>,  
Yi-Wei Chang<sup>1,§</sup>, Jacob Gyore<sup>2</sup>, Lin Teng<sup>3</sup>, Adam Gardner<sup>4</sup>,  
Joseph P. Vogel<sup>2,\*</sup>, Grant J. Jensen<sup>1,5,\*</sup>**

<sup>1</sup>Division of Biology and Biological Engineering,  
California Institute of Technology,  
Pasadena, CA 91125, USA.

<sup>2</sup>Department of Molecular Microbiology,  
Washington University School of Medicine,  
St. Louis, MO 63110, USA.

<sup>3</sup>Department of Animal Sciences &  
Emerging Pathogens Institute,  
University of Florida,  
Gainesville, FL 32611, USA.

<sup>4</sup>Molecular Graphics Laboratory  
Department of Integrative Structural  
and Computational Biology  
The Scripps Research Institute  
La Jolla, CA 92037, USA.

<sup>5</sup>Howard Hughes Medical Institute,  
California Institute of Technology,  
Pasadena, CA 91125, USA.

#These authors contributed equally

<sup>§</sup>Current Address:  
Departments of Biochemistry and Biophysics,  
Perelman School of Medicine, University of Pennsylvania,  
Philadelphia, PA 19104, USA.

\*To whom correspondence should be addressed.  
Email: [jensen@caltech.edu](mailto:jensen@caltech.edu) and [jvogel@wustl.edu](mailto:jvogel@wustl.edu)

Lead contact: [jensen@caltech.edu](mailto:jensen@caltech.edu)

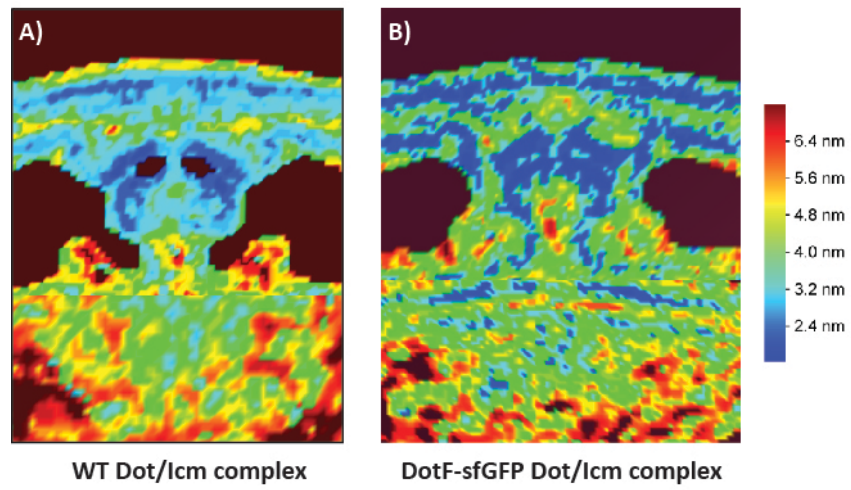

**Supplementary Figure 1. Local resolution of subtomogram averages.** (A) WT Dot/Icm complex, (B) DotF-sfGFP stabilized Dot/Icm complex. Local resolutions are calculated by ResMap<sup>1</sup>.

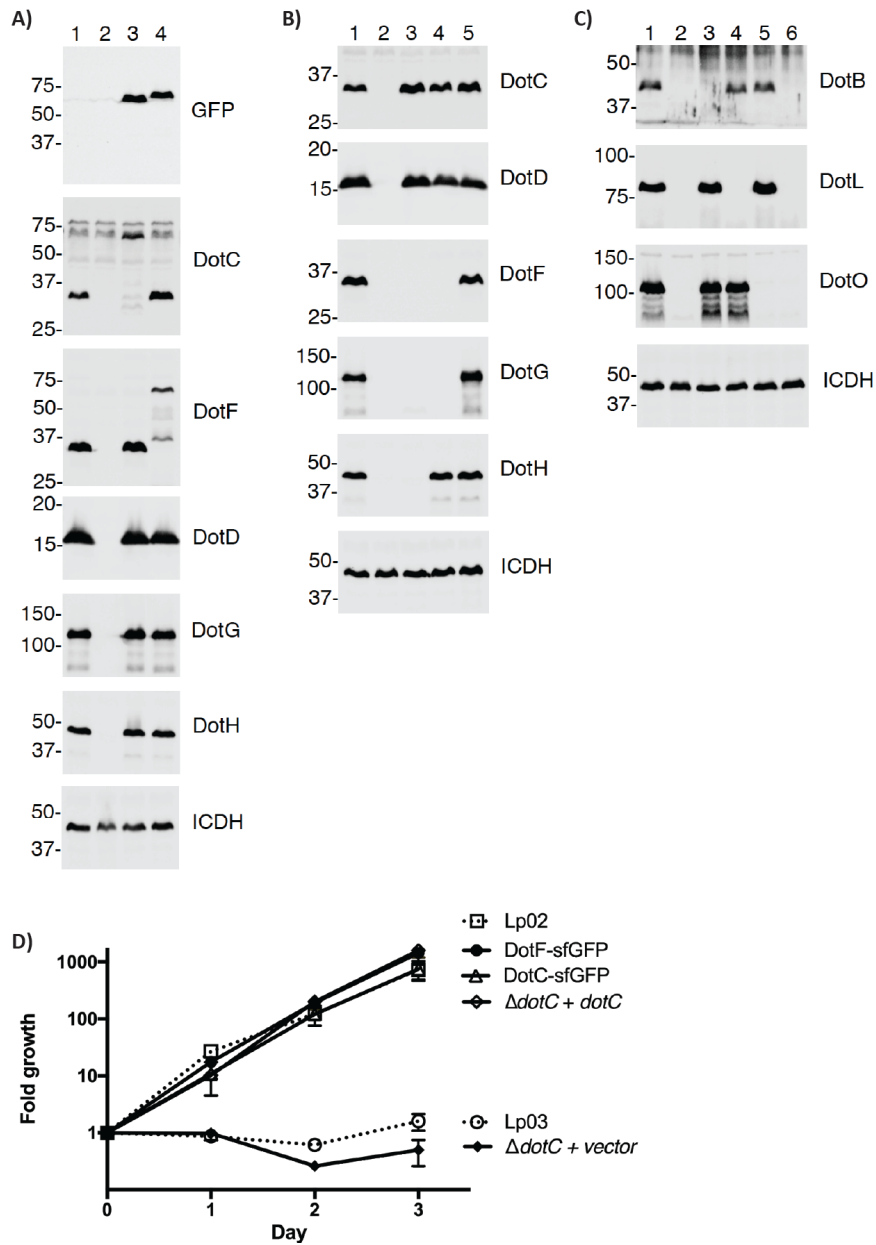

**Supplementary Figure 2. Confirmation of *L. pneumophila* strains.** Western blots with the indicated Dot-specific antibodies. Isocitrate dehydrogenase (ICDH), a cytoplasmic house-keeping protein, was used as a loading control for each set of blots. Samples were loaded in the following order: (A) 1. Lp02 (wild-type), 2. JV5319 ( $\Delta$ (UF)), 3. JV9114 (DotC-sfGFP), 4. JV9082 (DotF-sfGFP), (B) 1. Lp02 (wild-type), 2. JV5319 ( $\Delta$ (UF)), 3. JV7058 ( $\Delta$ dotF  $\Delta$ dotG  $\Delta$ dotH), 4. JV5460 ( $\Delta$ (UF) + DotCDFGH), 5. JV5443 ( $\Delta$ (UF) + DotCDFGH), and (C) 1. Lp02 (wild-type), 2. JV5319 ( $\Delta$ (UF)), 3. JV918 ( $\Delta$ dotB), 4. JV2422 ( $\Delta$ dotA  $\Delta$ dotL), 5. JV1644 ( $\Delta$ dotO), 6. JV6781 ( $\Delta$ dotB  $\Delta$ dotL  $\Delta$ dotO). Similar blots are already published for other mutants<sup>2-5</sup>. Each of these experiments were done three times and representative blots are shown. (D) Strains expressing DotF-sfGFP and DotC-sfGFP are functional for intracellular growth. A wild-type *Legionella* strain (Lp02), a strain expressing DotF-sfGFP (JV9082), a strain expressing DotC-sfGFP (JV9114), a  $\Delta$ dotC mutant containing wild type dotC (JV5264), a T4SS-defective strain with a dotA mutation (Lp03), or a  $\Delta$ dotC mutant containing vector (JV5263) were used to infect U937 cells. Growth was assayed by plating for colony forming units (CFUs) over three days. Data is representative of three independent experiments.

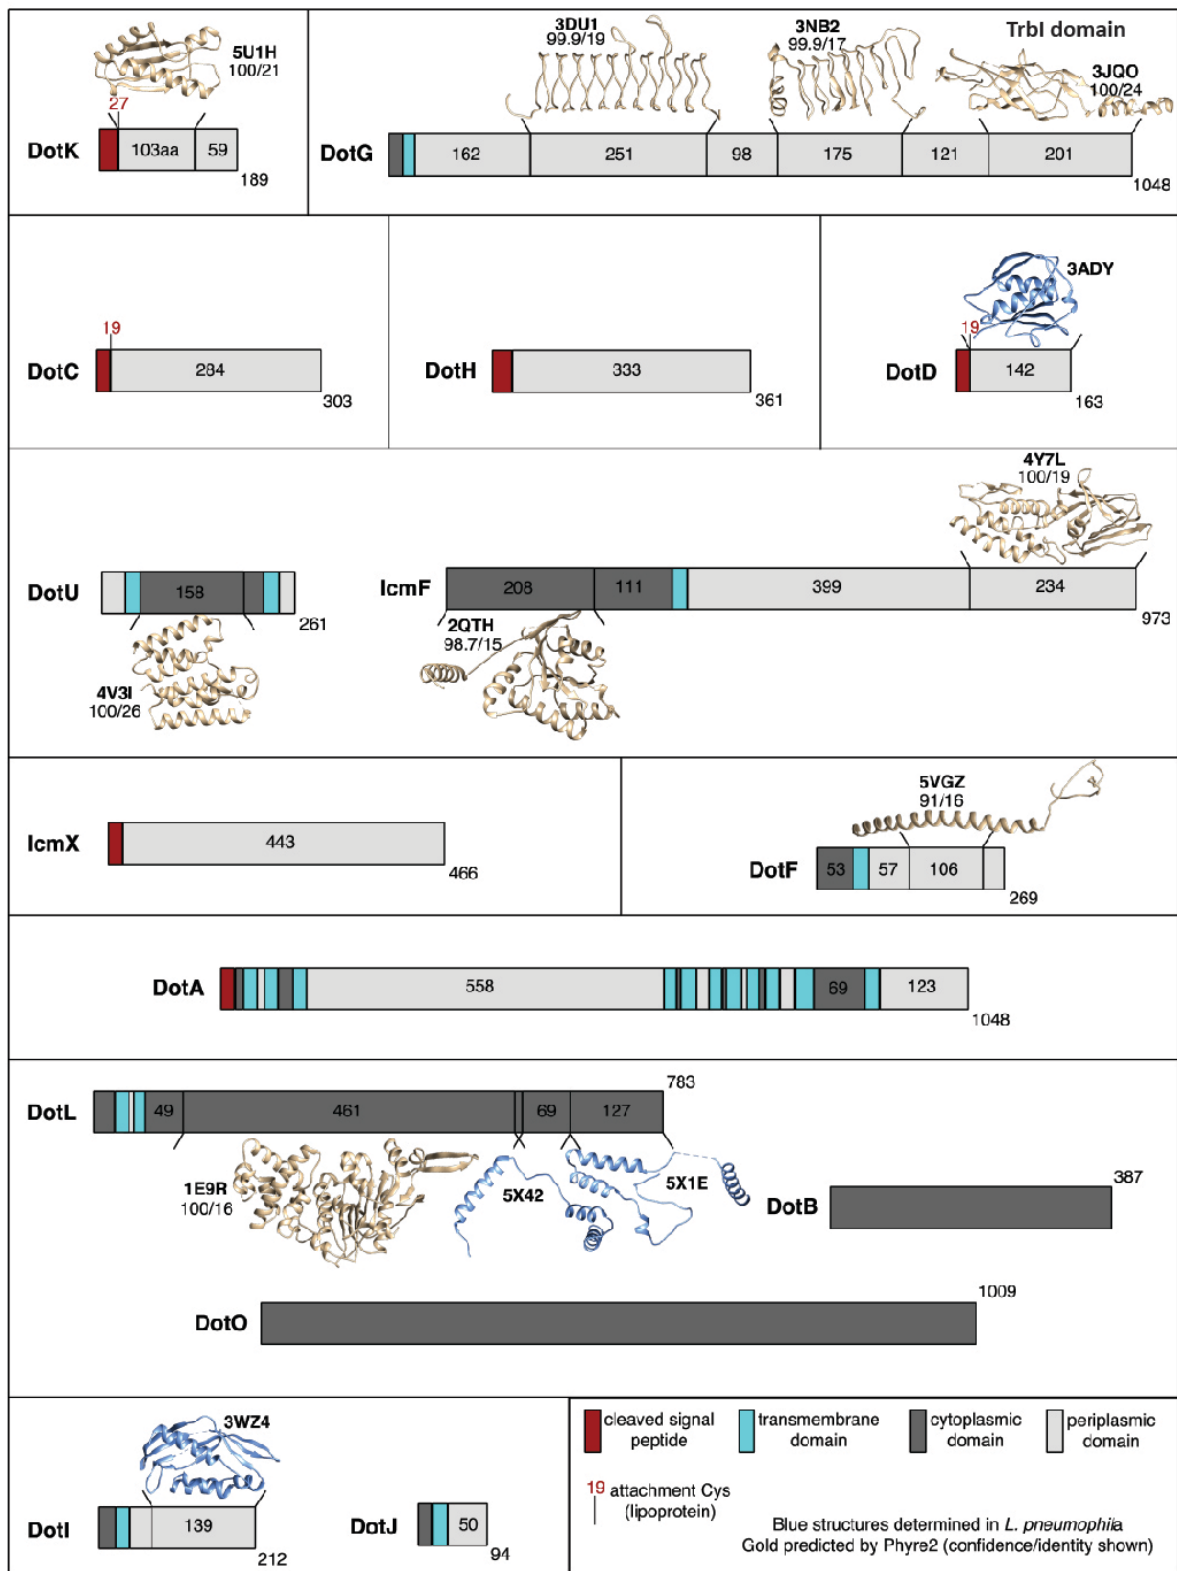

Supplementary Figure 3. Domain structures of proteins considered here. (see legend on next page)



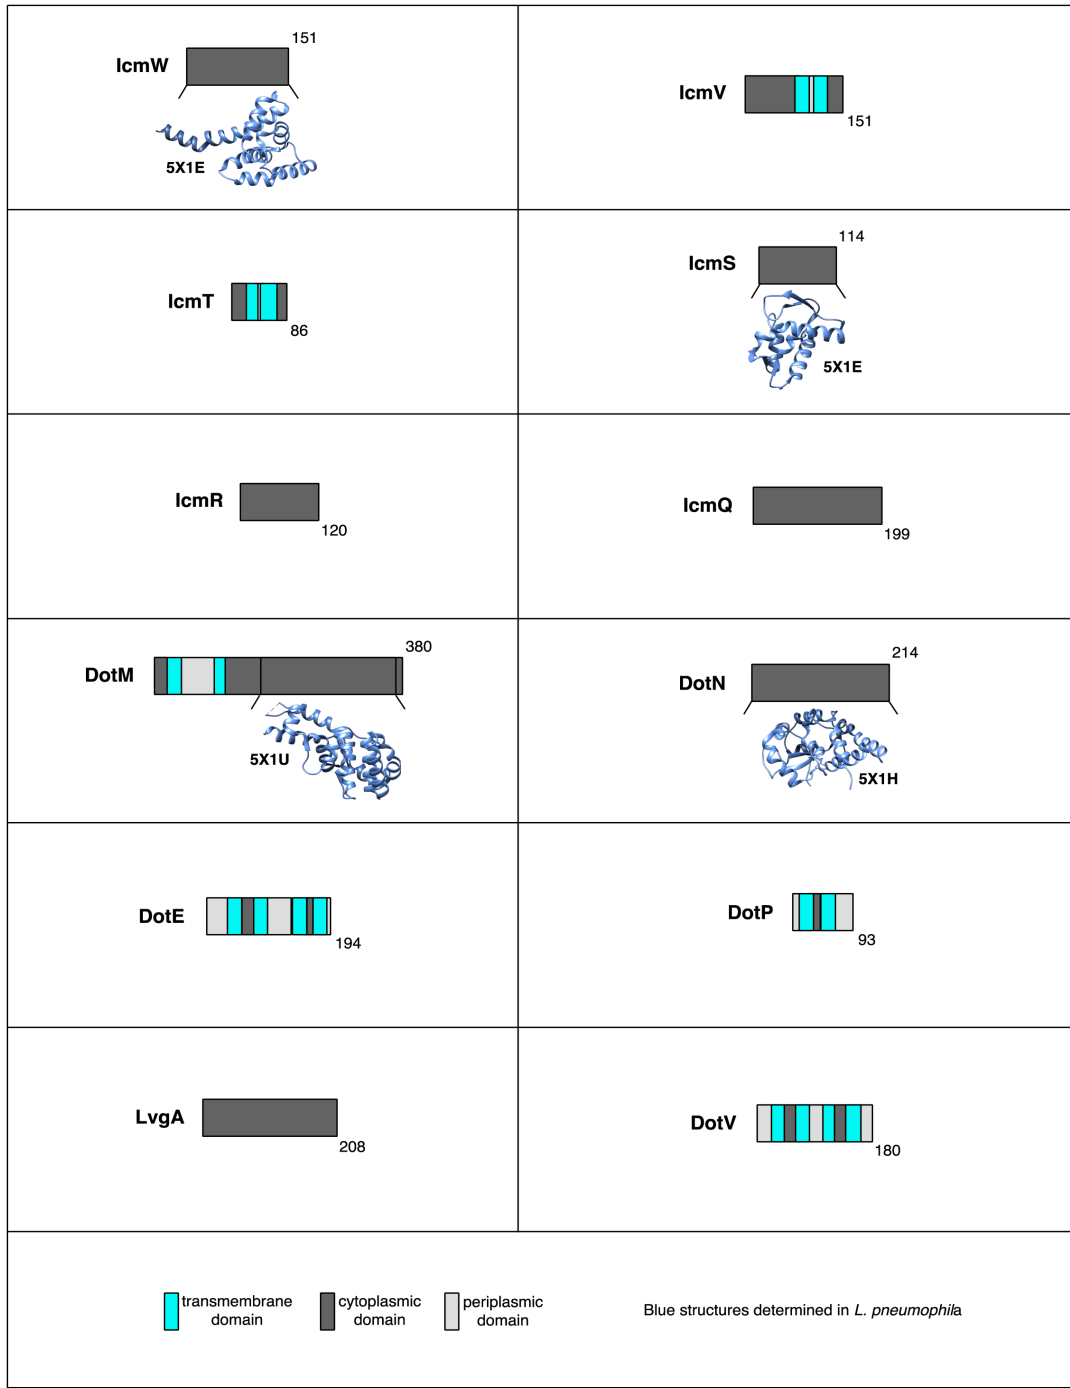

**Supplementary Figure 4. Domain structures of components not treated in this study.** Sequences of different proteins obtained from UniProt. Predicted domains (by Phyre2<sup>6</sup>, I-TASSER<sup>7</sup> and Quark<sup>8</sup>) are shown from N- (left) to C-terminus (right). Red = cleaved signal peptide, cyan = transmembrane domain (TMHMM/Phobius), dark gray = cytoplasmic domain, light gray = periplasmic domain. Domains whose structure has been solved (blue) or predicted with high confidence (gold) are indicated. In each case, the structure (with PDB ID, and confidence/sequence identity for Phyre2 predictions) is shown above the domain if periplasmic and below if cytoplasmic. The length of key domains is indicated, with total protein length listed at the C-terminus. The locations of cysteines in lipoproteins (SignalP 4.1) that are linked to the OM are noted in red.

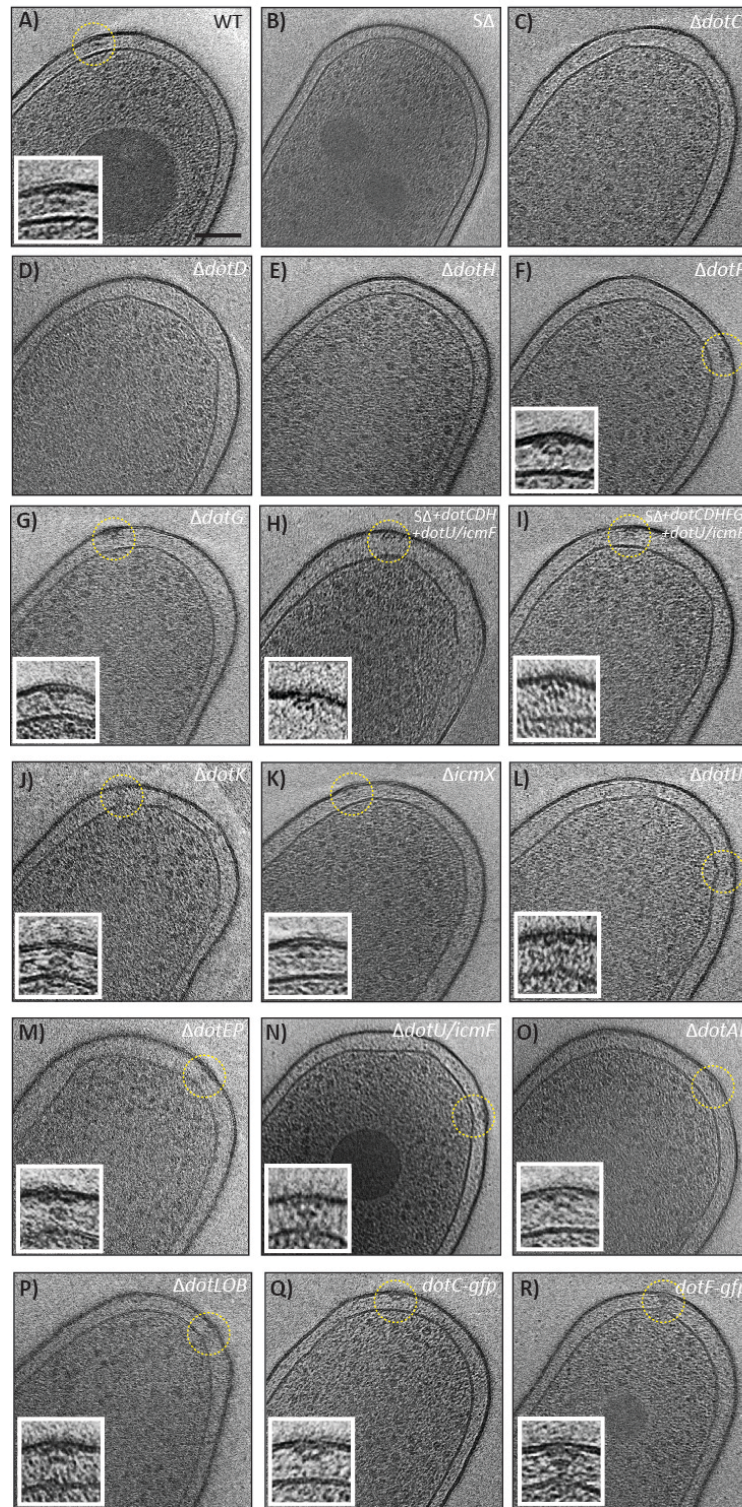

**Supplementary Figure 5. Electron cryotomography of intact *Legionella pneumophila* cells expressing T4SSs.** (A-R) Panels show tomographic slices 8-nm thick through one representative cell of each strain imaged. The strain identity is given in the upper right corner of each panel. In those strains in which T4SS particles or sub-particles were seen, an enlarged image of an example particle is shown in the inset. Scale bar (A-R) 100 nm.



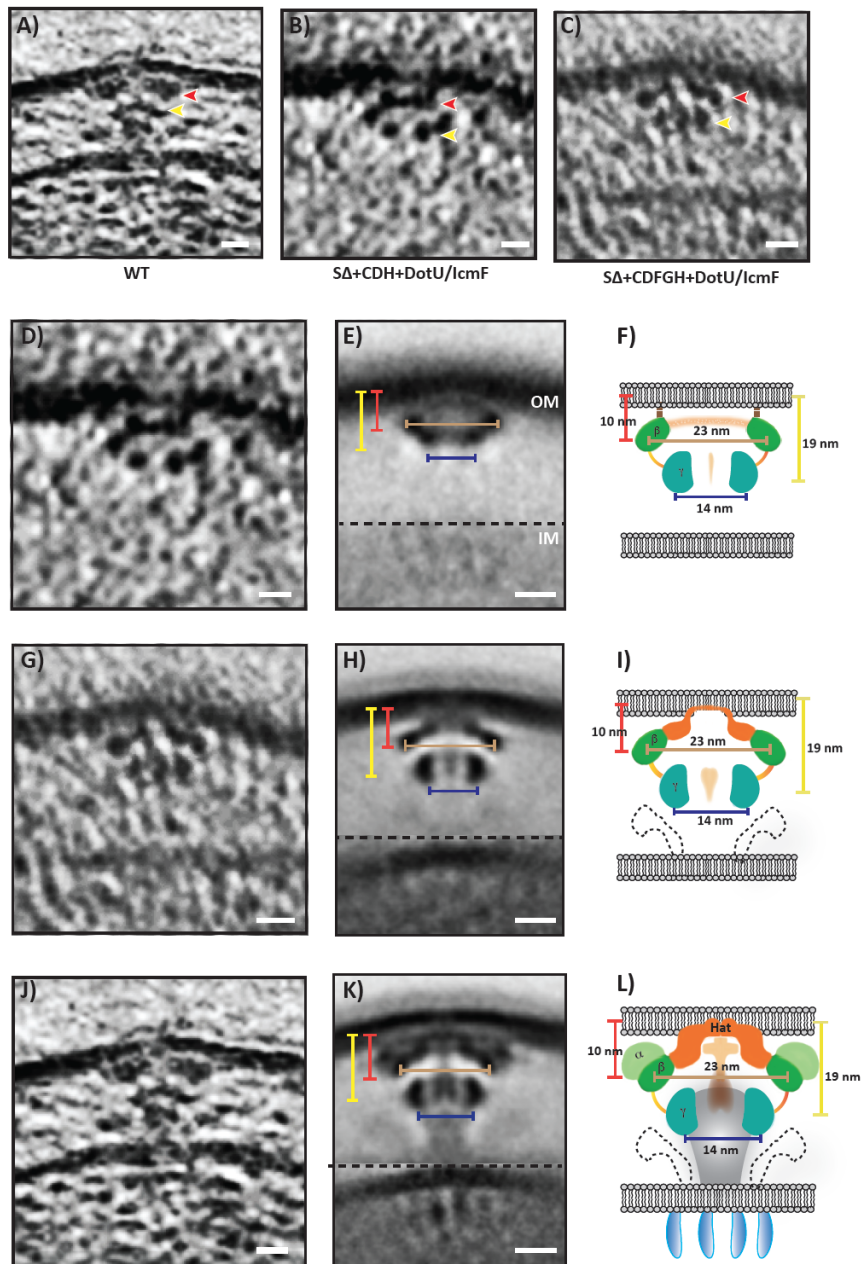

**Supplementary Figure 6. Beta and gamma densities are present in WT, reconstituted DotCDH (+DotU/IcmF) and reconstituted DotCDHFG (+DotU/IcmF) complexes.** (A-C) Gamma densities in individual particles of the reconstituted DotCDH (+DotU/IcmF) complex are comparable to those of the reconstituted DotCDHFG (+DotU/IcmF) complex and the WT complex. However, due to flexibility, they appear less pronounced in the reconstituted DotCDH (+DotU/IcmF) average. Red arrowheads point to beta-densities and yellow arrowhead point to gamma densities. (D-F) Showing individual reconstituted DotCDH (+DotU/IcmF) subcomplex (D), subtomogram average of the DotCDH (+DotU/IcmF) subcomplex (E), and schematic of the reconstituted average (F) showing distances between the two beta-densities (beige, 23 nm), distance between the two gamma densities (dark blue, 14 nm) and the distance between the OM and the beta densities (red, 10 nm), and distance between the OM and the gamma densities (yellow, 19 nm). (G-I) Same as (D-F) but for the reconstituted DotCDHFG (+DotU/IcmF) core-complex. (J-L) Same as (D-F) but for the WT Dot/Icm T4BSS complex. Scale bar 10 nm (A-C,D,E,G,H,I,J,K). Number of tomograms and particles used for the subtomogram average are listed in Supplementary Information Table 1.

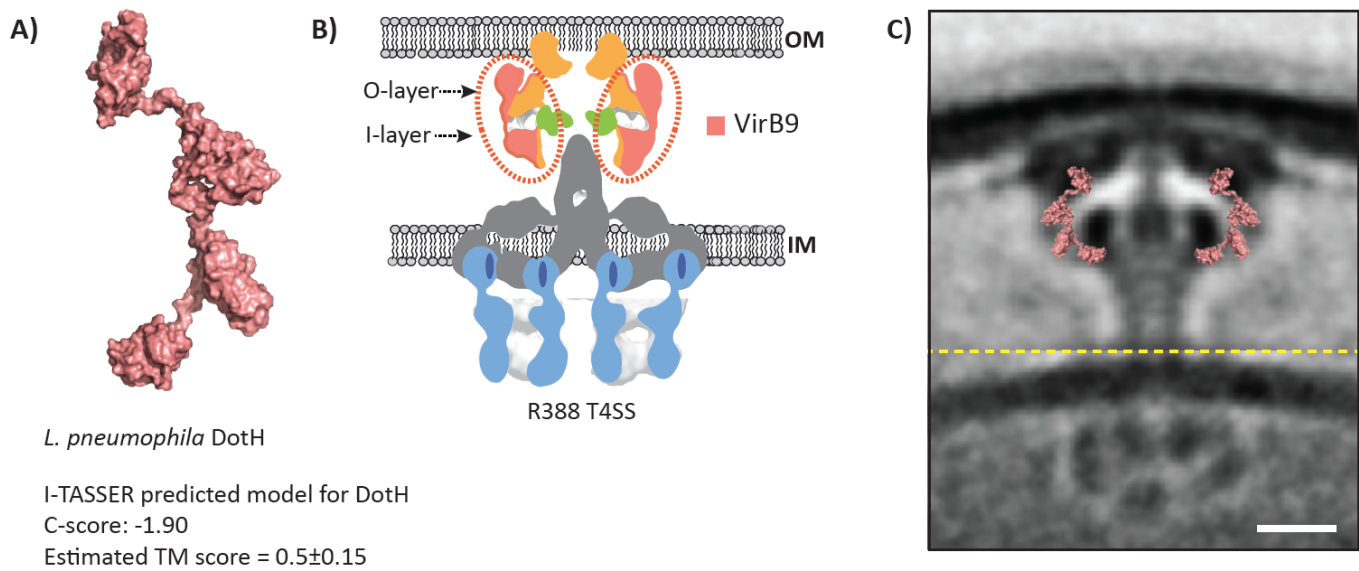

**Supplementary Figure 7. Secondary structure predictions of DotH.** (A) Prediction of DotH structure using I-TASSER suggests that DotH includes two or more separate domains. (B) DotH and VirB9 are suggested to be counterparts. VirB9 in the T4ASS also has two separate domains that extend between the O-layer and the I-layer<sup>9</sup>. (C) DotH's predicted structure fits well in the Dot/Icm complex. Circumstantial evidence suggests that DotH would extend between the beta and the gamma densities along the elbow very much like VirB9. Scale bar 10 nm (C).

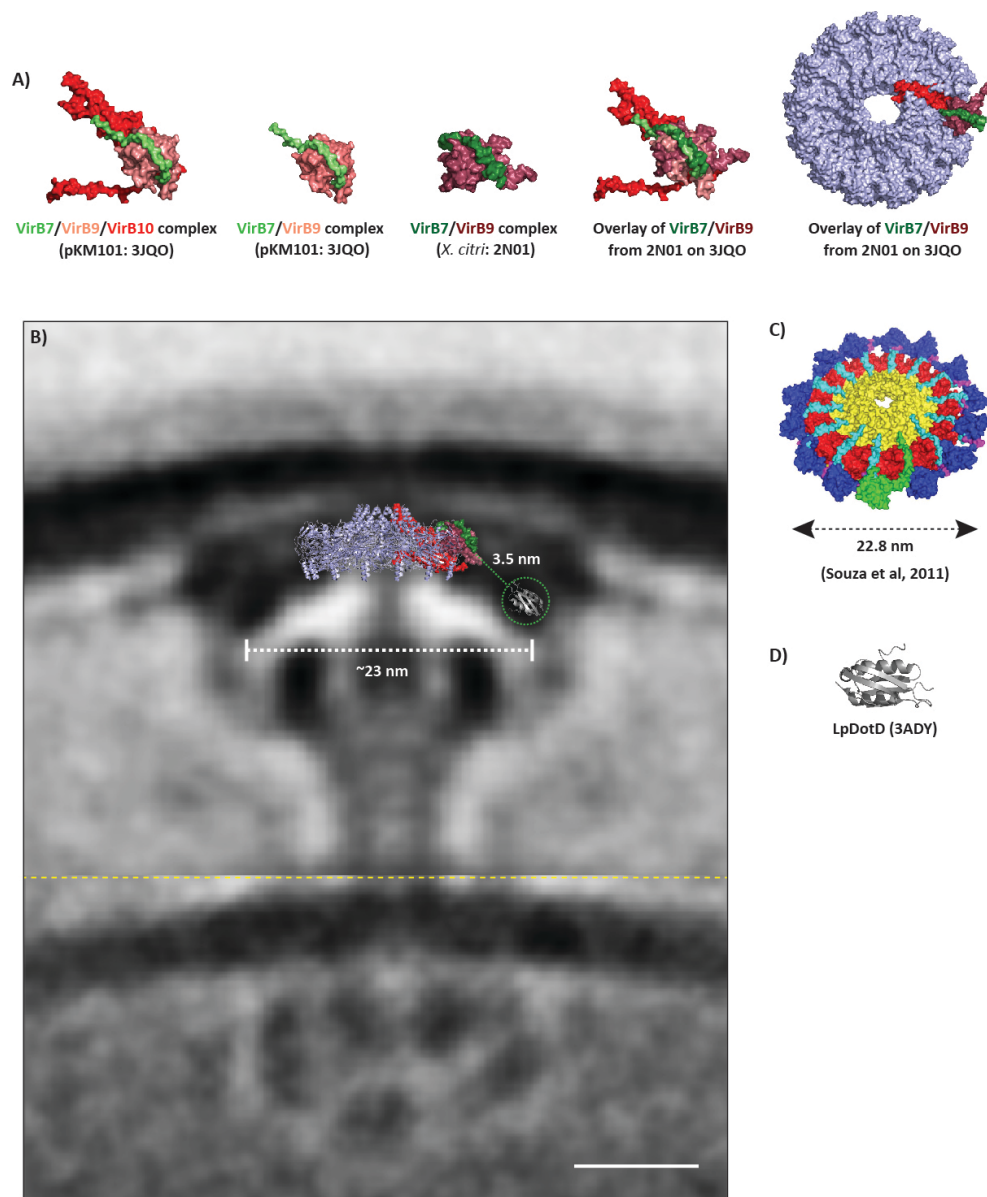

**Supplementary Figure 8. Positioning of DotD's N0 domain.** (A-B) Overlaying the *X. citri* VirB7/9 complex (2N01) on the pKM101 VirB7/9/10 OM complex (3JQO) indicates that the *X. citri* VirB7-N0 domain would be at the periphery of the OM complex. Since VirB7 and DotD are counterparts and DotD also has an N0 domain, we propose that DotD's N0 domain would occupy a very similar position as *X. citri* VirB7's N0 domain. Comparing the lipidation residue, and length of DotD's N-terminal disordered region and *X. citri* VirB7/VirB9 interaction interface, we propose that DotD's N0 domain will be 3.5 nm or less away from the hat. The only unaccounted-for density within that distance from the periphery of the hat is the beta density. The beta densities form a ring of diameter ~23 nm. (C) A very similar diameter ring was proposed by Souza et al. for the *X. citri* VirB7-N0 domain. (D) Crystal structure of the *L. pneumophila* DotD N0 domain. Scale bar 10 nm (B).

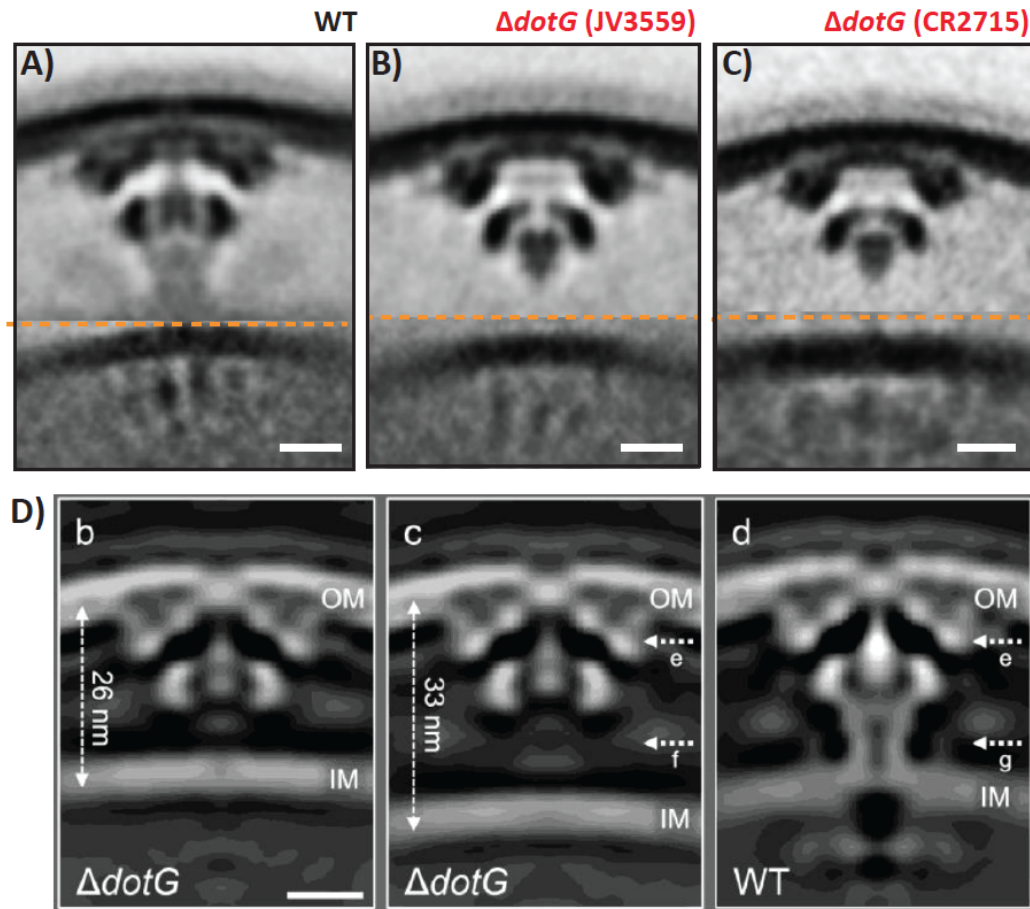

**Supplementary Figure 9. Discrepancies between the subtomogram averages of a  $\Delta dotG$  mutant.** Previously a subtomogram average was reported for the  $\Delta dotG$  mutant strain CR2715<sup>10</sup>, which was constructed in the Roy laboratory (Yale University). However, the average was substantially different than what was observed using an independently constructed  $\Delta dotG$  strain, JV3559 (Vincent et al, 2006). To resolve this difference, CR2715 was reimaged using the same technique as done for JV3559. (A-C) Central slices through sub-tomogram averages of the (A) WT Dot/Icm complex, (B) the  $\Delta dotG$  average from the JV3559 strain used in this study, and (C) the  $\Delta dotG$  average from the CR2715 strain used by Chetrit et al. In our hands, both  $\Delta dotG$  strains (JV3559 and CR2715) produced identical results as including the absence of the OM associated “hat” structure, a lowered “plug” density and the disappearance of the stalk-channel. In contrast, Chetrit et al reported no changes in the “hat” and “plug” density but observed alteration in the stalk-channel density<sup>10</sup>. Based on our analysis, the  $\Delta dotG$  subtomogram averages reported in Chetrit et al are more consistent with the absence of *dotA* (Fig. 2Q, 2U). (D) Central slice through sub-tomogram averages of  $\Delta dotG$  complex (b-c) (reproduced from Chetrit et al<sup>10</sup>, b-c represent two different classes); the WT complex is shown in panel d). (A-D) Scale bar 10 nm.



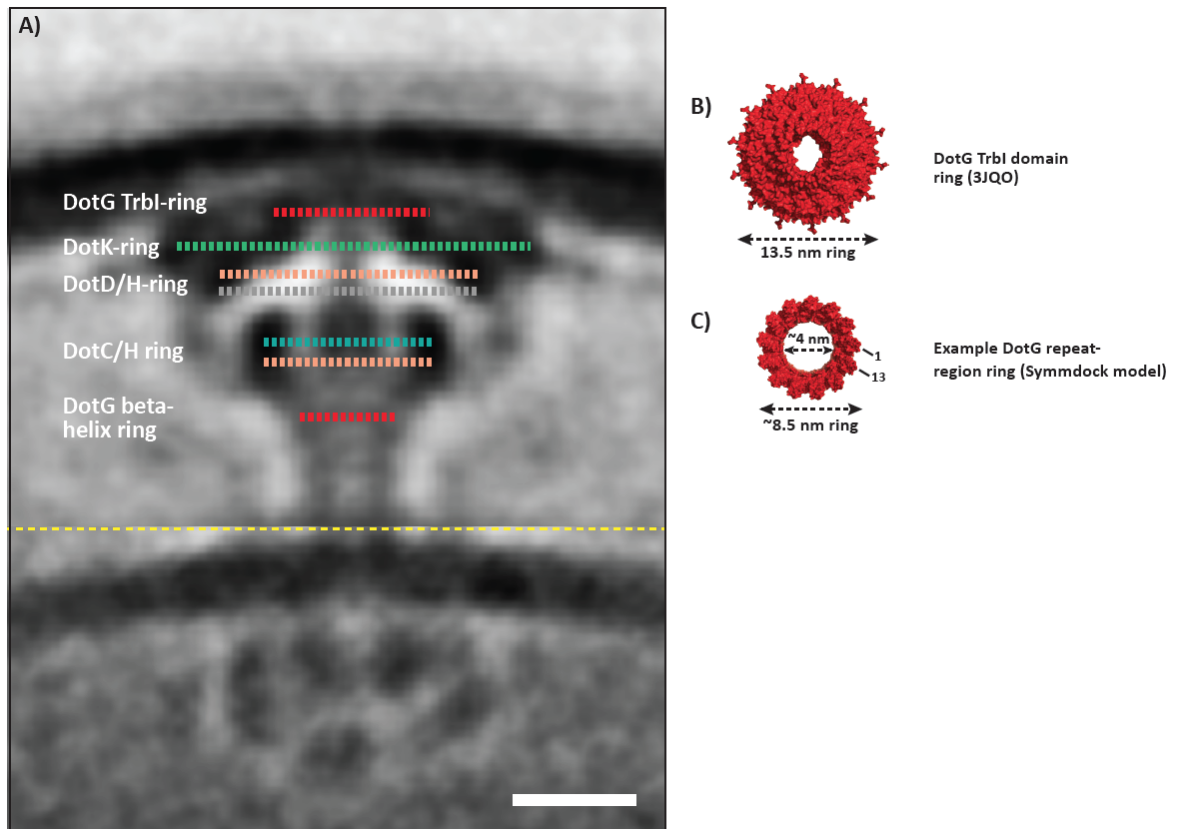

**Supplementary Figure 10. The Dot/Icm complex is composed of several stacked ring-like structures.** (A) OM-associated DotG TrbI-ring (red dotted line), DotK-ring (green dotted line), DotD/H-ring (salmon and grey dotted lines), periplasmic DotC/H-ring (cyan and salmon dotted lines), and DotG beta-helix ring (red dotted line). (B) A top-view of the TrbI ring formed by VirB10 in the VirB7/9/10 complex (3JQO). (C) Cross-section of the periplasmic channel formed by the DotG repeat region with an inner lumen diameter of ~4 nm and an outer diameter of ~8.5 nm. Outer and inner diameters of a 13-mer ring are consistent with the channel width seen in the subtomogram average. Scale bar 10 nm (A).

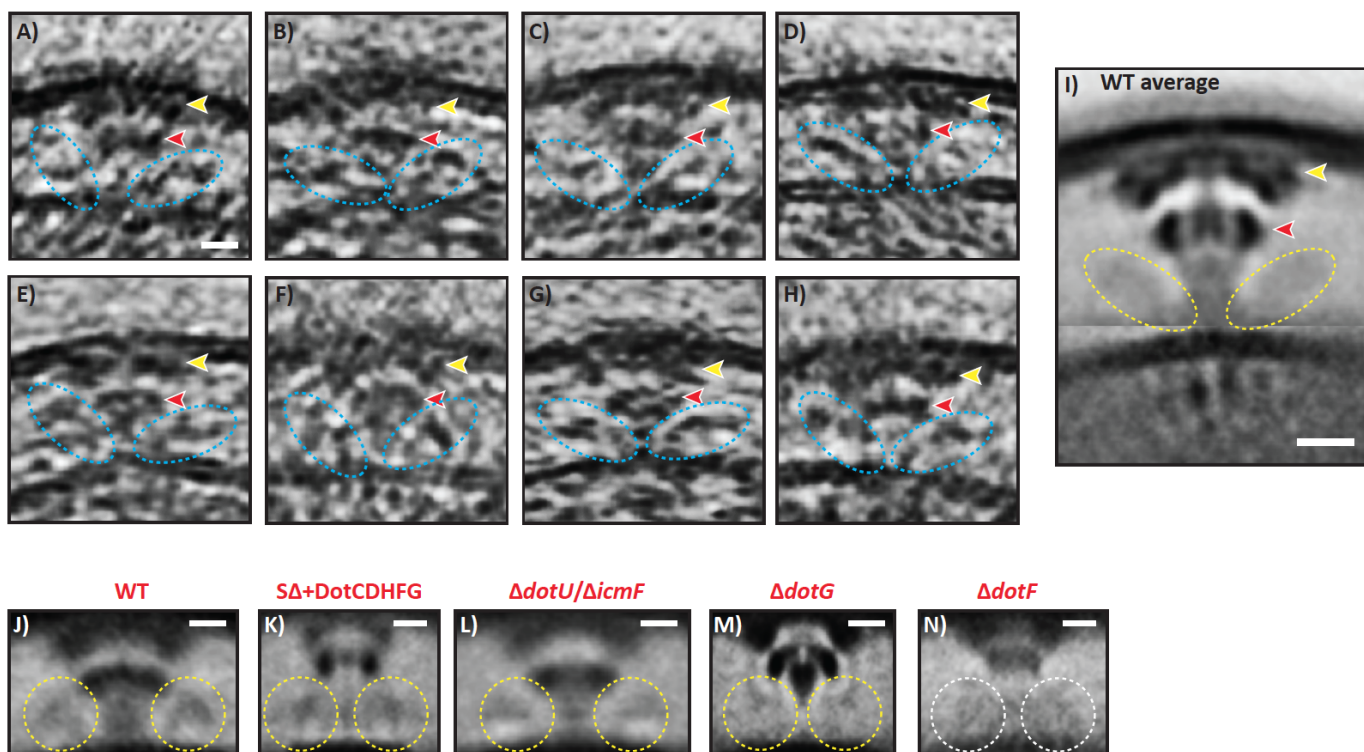

**Supplementary Figure 11. Flexibility and identification of the wings as DotF.** (A-H) Tomographic slices through wild-type T4BSSs showing wing densities (circled in blue) in various locations with respect to the membranes and the rest of the T4BSS. (I) Average of the wild-type T4BSS, with yellow and red arrowheads and yellow circles as in individual particles for positional reference. Scale bar 10 nm. (J-N) Central slices through sub-tomogram averages of various strains with particles aligned on the region of the wing density (between IM and gamma ring). Yellow circles indicate presence of wings, white circles indicate absence. Scale bar 10 nm (A-N).



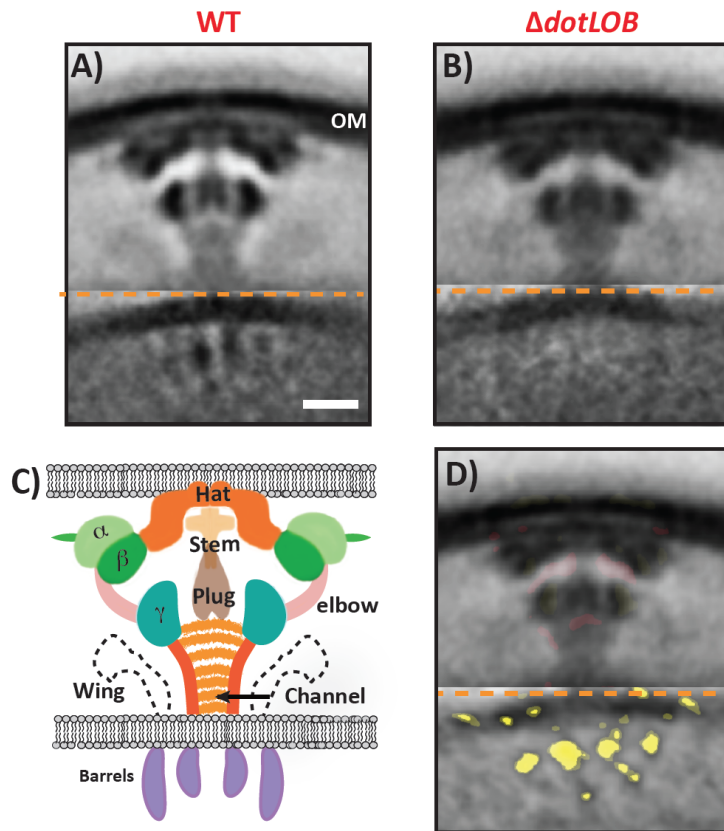

**Supplementary Figure 12. Cytoplasmic densities are missing due to the loss of the DotL, DotO, DotB (DotLOB) ATPases.** Central slices through the sub-tomogram average structures of the WT Dot/Icm T4BSS (A) and a mutant strain lacking the DotLOB ATPases (B). (C) Schematic of the WT complex showing distinct densities. Cytoplasmic densities are shown in purple. (D) Difference map between the WT structure and the ATPase deletion structure. Yellow represents missing densities and red extra densities. Weak to strong intensities correspond to density differences from one to three standard deviations, respectively, overlaid on the mutant sub-tomogram average. In the deletion mutant all the cytoplasmic densities are missing. Scale bar 10 nm (A,B,D).

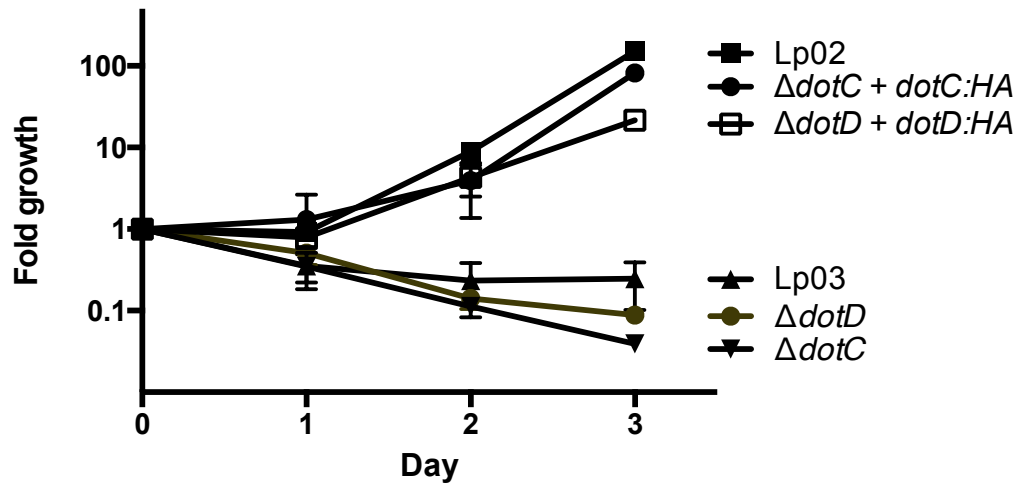

**Supplementary Figure 13. Epitope tagged versions of DotC and DotD are functional for intracellular growth.** DotC and DotD were fused to the HA tag at their C-termini and expressed in a  $\Delta dotC$  mutant and a  $\Delta dotD$  mutant, respectively. A wild type *Legionella* strain (Lp02), a *dotA* mutant (Lp03), a  $\Delta dotC$  mutant containing vector (JV5263) or wild type DotC (JV5264) or DotC-HA3X (JV5484) and a  $\Delta dotD$  mutant containing vector (JV5266) or wild type DotD (JV5267) or DotD-HA3X (JV5268) were used to infect U937 cells. Growth was assayed by plating for colony forming units (CFUs) over three days. Data is representative of three independent experiments (n=3). Data are presented as means  $\pm$  SEM.

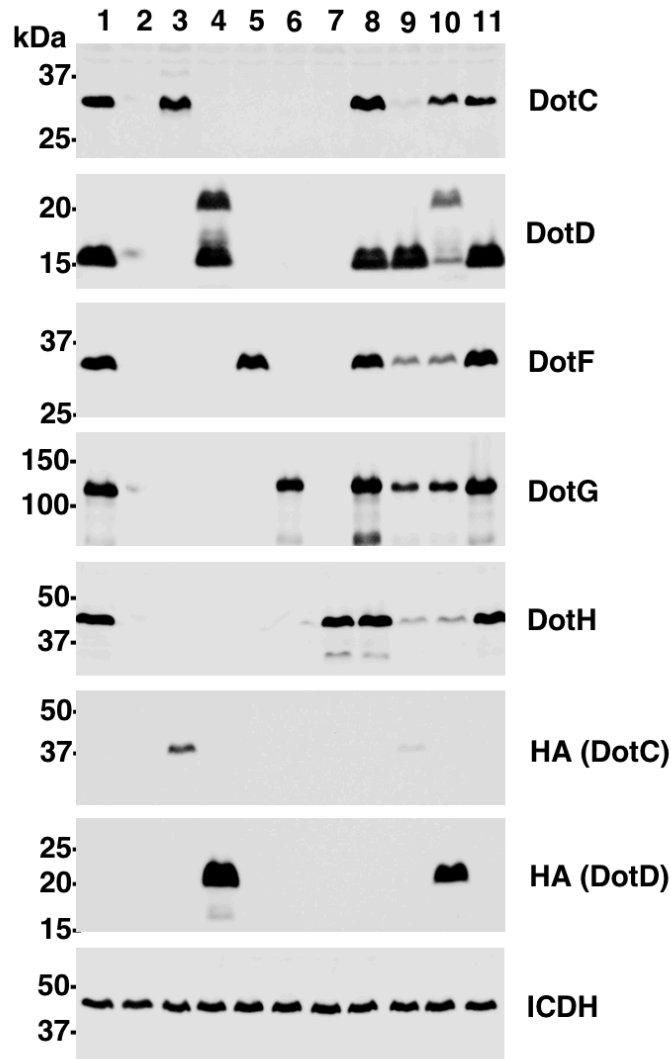

**Supplementary Figure 14. Expression of the correct components in the S $\Delta$  strain (JV4044) for Figure 3A.** *L. pneumophila* strains were grown to late exponential phase and westerns were done with the indicated antibodies. Isocitrate dehydrogenase (ICDH), a cytoplasmic housekeeping protein, was used as a loading control. Samples were loaded in the following order: 1. JV1139 (Lp02 + pJB908), 2. JV4209 (S $\Delta$  + vector), 3. JV4694 (S $\Delta$  + *dotC:HA3x*), 4. JV4695 (S $\Delta$  + *dotD:HA3x*), 5. JV4669 (S $\Delta$  + *dotF*), 6. JV4688 (S $\Delta$  + *dotG*), 7. JV4671 (S $\Delta$  + *dotH*), 8. JV5442 (S $\Delta$  + *dotCDFGH*), 9. JV9128 (S $\Delta$  + *dotC:HA3x dotD dotFGH*), 10. JV9129 (S $\Delta$  + *dotD:HA3x dotC dotFGH*), 11. JV1139 (Lp02 + pJB908). Each of these experiments were done three times and representative blots are shown.

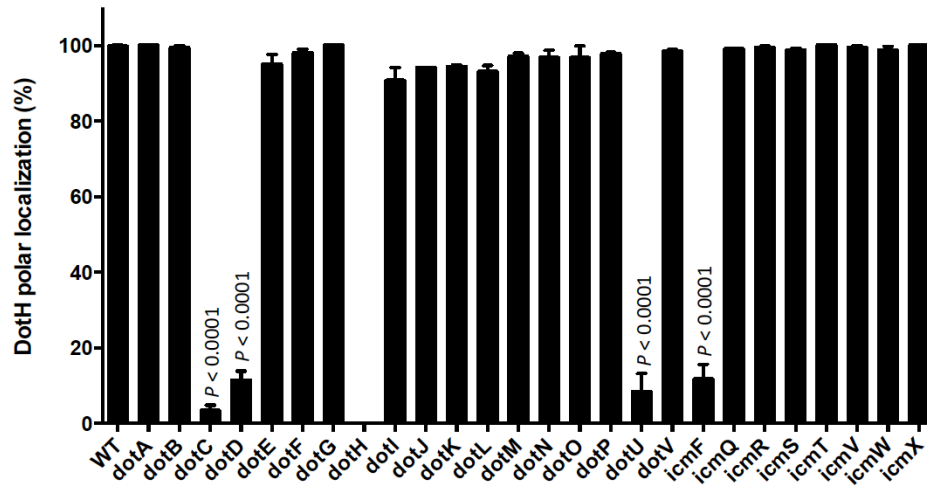

**Supplementary Figure 15. Quantitation of polar localization of DotH for Figure 3B.** The percent of cells having polar localization of the DotH in individual *dot/icm* deletions was determined from three independent experiments (n=3) (100 cells counted from each experiment). Data are presented as means  $\pm$  SEM. P value indicates statistical difference compared to the wild-type strain Lp02 (WT) by unpaired two-tailed Student's t-test.

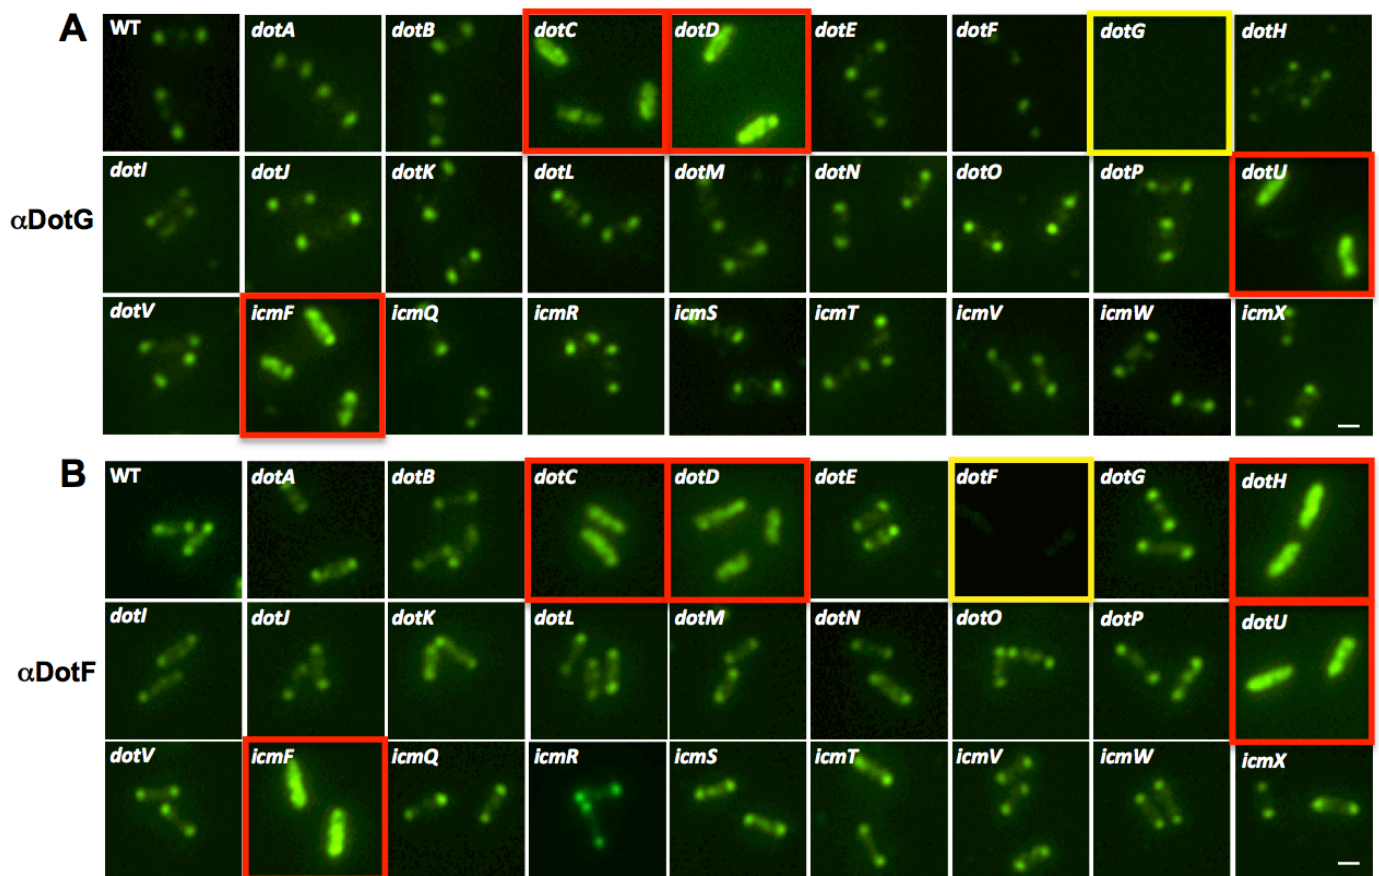

**Supplementary Figure 16. (A,B) DotG and DotF localization in wild-type *Legionella* and in individual *dot/icm* deletions.** DotG and DotF were detected by immunofluorescence microscopy in wild-type cells (WT) and individual *dot/icm* mutant strains. The corresponding deletion strains is boxed in yellow and *dot/icm* deletions that have an effect are boxed in red. Representative images are shown from three independent experiments. Scale bar: 2  $\mu$ m (A,B).

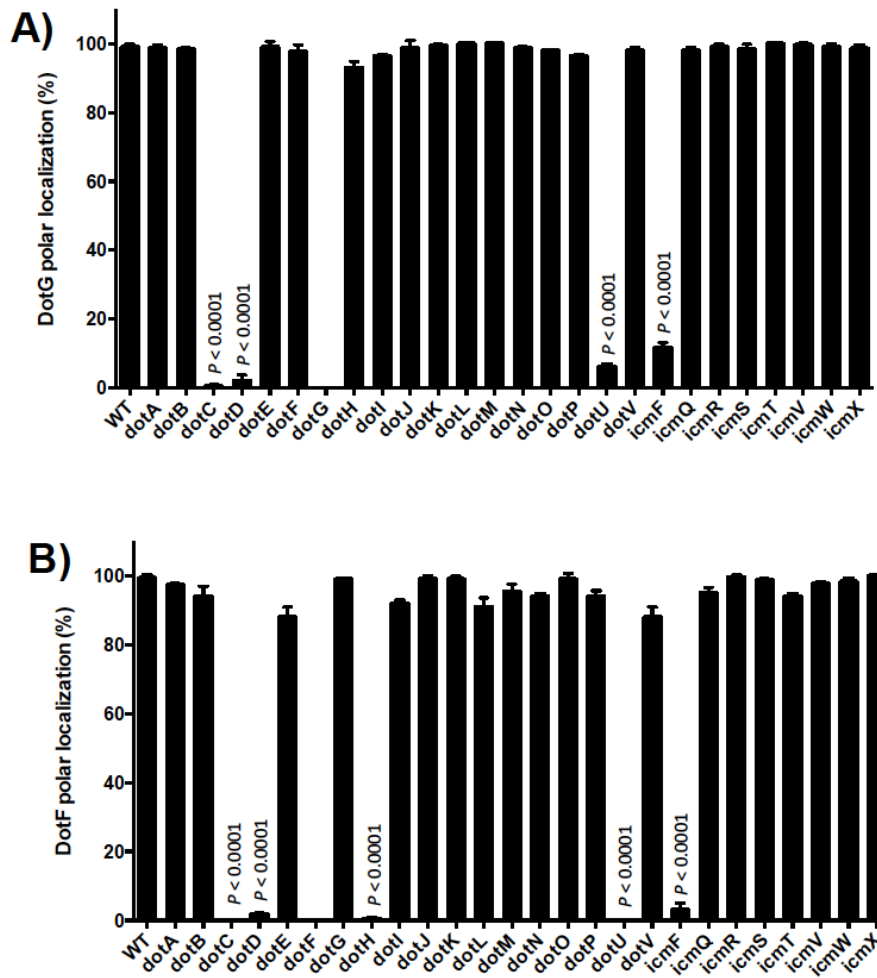

**Supplementary Figure 17. (A,B) Quantitation of polar localization of DotG and DotF.** The percent of cells having polar localization of the Dot proteins in individual *dot/icm* deletions was determined from three independent experiments (n=3) (100 cells counted from each experiment) and are shown in panels: DotG (A), and DotF (B). Data are presented as means  $\pm$  SEM. P value indicates statistical difference compared to the wild-type strain Lp02 (WT) by unpaired two-tailed Student's t-test.

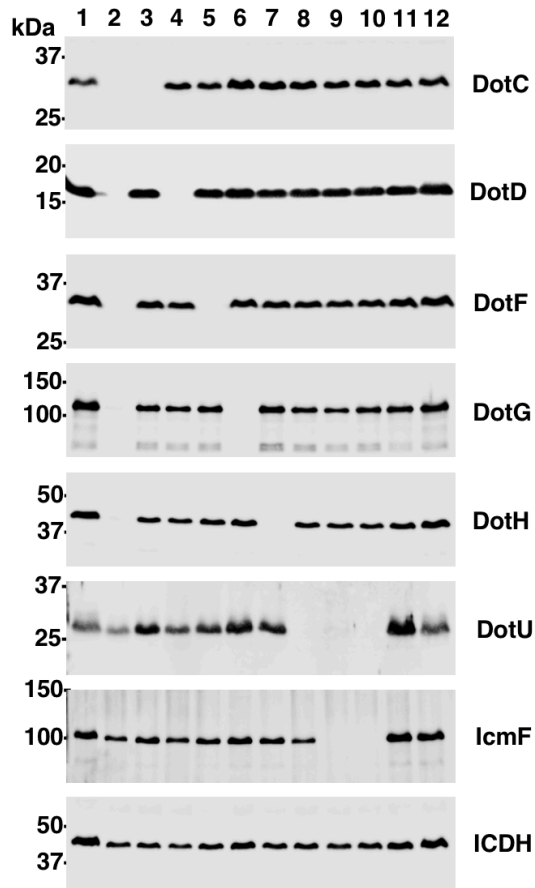

**Supplementary Figure 18. Correct expression of DotC, DotD, DotF, DotG, DotH, DotU and IcmF in various strains in Figure 3B and Supplementary Figure 15.** *L. pneumophila* strains were grown to late exponential phase and westerns were done with the indicated antibodies. ICDH, a cytoplasmic housekeeping protein, was used as a loading control. Samples were loaded in the following order: 1. JV1139 (Lp02 + pJB908), 2. JV5402 ( $\Delta$ (UF) + vector), 3. JV3743 ( $\Delta$ dotC), 4. JV3572 ( $\Delta$ dotD), 5. JV3579 ( $\Delta$ dotF), 6. JV3559 ( $\Delta$ dotG), 7. JV3563 ( $\Delta$ dotH), 8. JV4015 ( $\Delta$ dotU), 9. JV1179 ( $\Delta$ icmF), 10. JV1196 ( $\Delta$ dotU  $\Delta$ icmF + vector), 11. JV1199 ( $\Delta$ dotU  $\Delta$ icmF + dotU icmF), 12. JV1139 (Lp02 + pJB908). Each of these experiments were done three times and representative blots are shown.

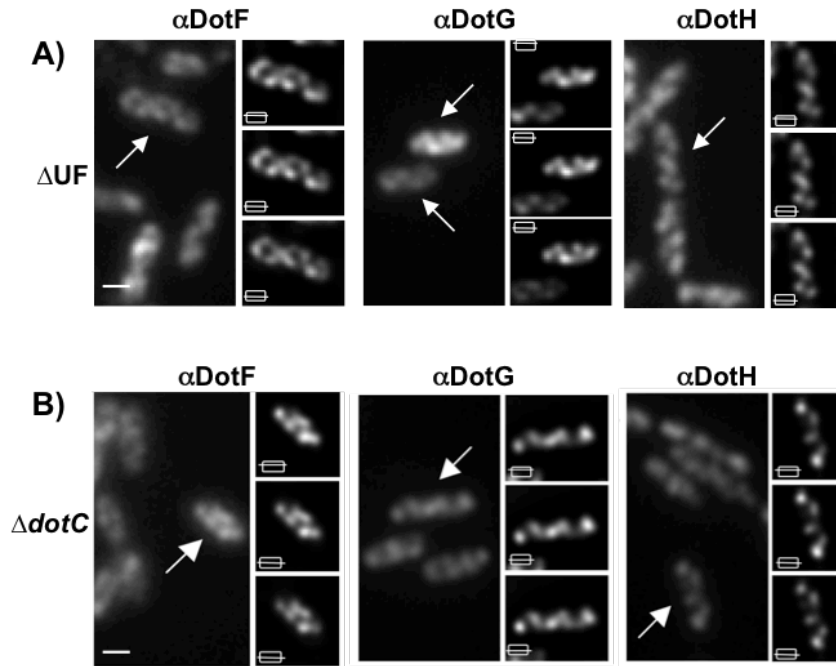

**Supplementary Figure 19. DotF, DotG and DotH proteins are found in non-polar punctae in the  $\Delta dotU \Delta icmF$  ( $\Delta UF$ ) and the  $\Delta dotC$  mutants.** DotF, DotG, and DotH localization was assayed using a lower amount of primary antibody and deconvolution microscopy. For each strain, four images are shown including an optical section before deconvolution (left) and three images of a top optical section, a middle optical section, and a bottom optical section (right panel). Arrows in the left image indicate the cell that was deconvoluted. Representative images from three independent experiments are shown for the  $\Delta UF$  mutant (A) and the  $\Delta dotC$  mutant (B). Scale bar 2  $\mu m$ .



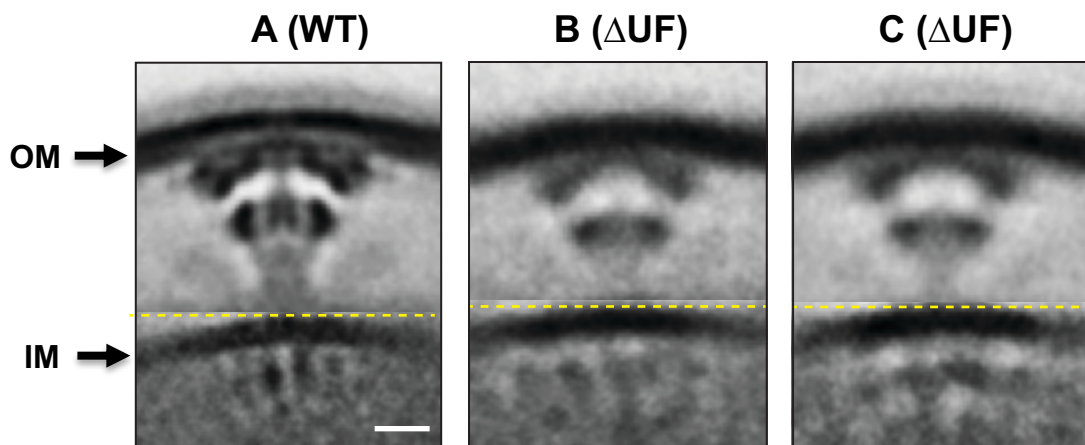

**Supplementary Figure 20. Comparison of T4SS complexes in the wild-type (WT) strain and the  $\Delta dotU \Delta icmF$  ( $\Delta UF$ ) mutant by ECT analysis.** Shown are central slices through the sub-tomogram averages of polar WT complexes (A), non-polar  $\Delta UF$  complexes (B) and polar  $\Delta UF$  complexes (C). Approximately the same numbers of polar and non-polar complexes were detected in the  $\Delta UF$  mutant (240 polar and 202 non-polar particles). However, only about one quarter as many complexes were detected in the  $\Delta UF$  mutant compared to a wild-type cell (1.8 complexes versus 7.6 complexes, respectively) likely due to the failure to assemble a visible DotHCD subcomplex in the absence of UF. In addition, the complexes that were observed resolved poorly due to decreased stability of the T4BSS apparatus. In WT cells, no non-polar complexes were detected in  $\sim 2000$  cells. Scale bar 10 nm (A-C). Number of tomograms and particles used for the subtomogram average are listed in Supplementary Information Table 1.

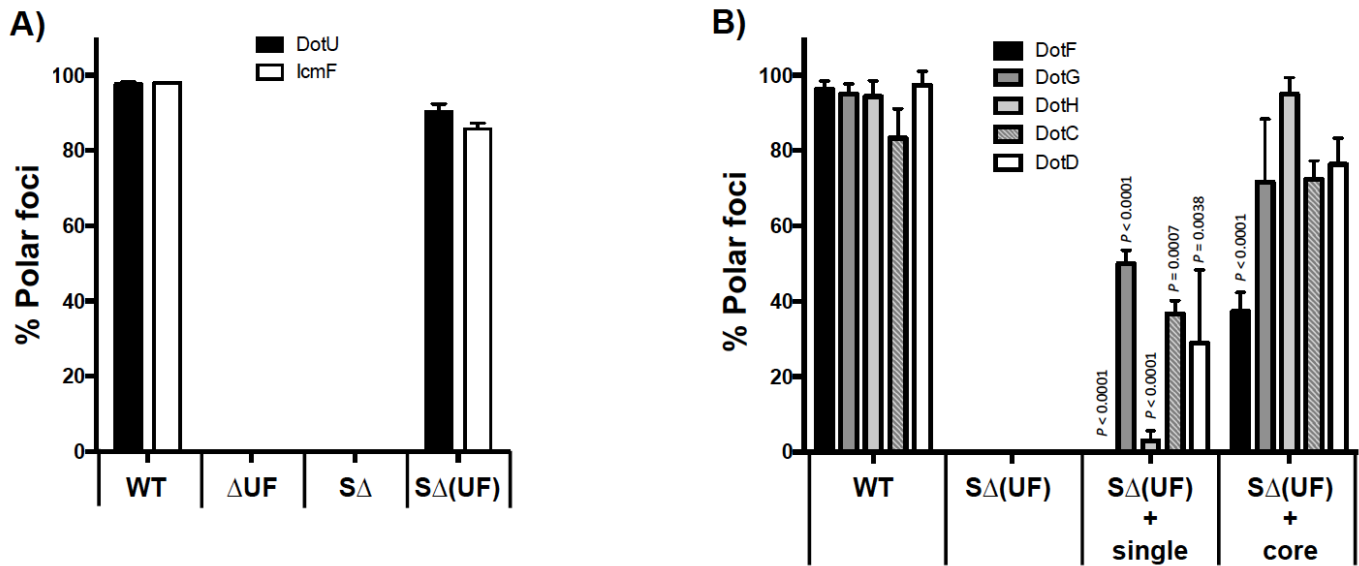

**Supplementary Figure 21. Quantitation of polar localization of Dot proteins for Figure 4.** The percent of cells having polar localization of the DotU and IcmF proteins (A) and DotF, DotG, DotH, DotC, and DotD (B) in the wild-type strain Lp02 (WT),  $\Delta dotU \Delta icmF$  mutant strain (JV1181), the super *dot/icm* deletion strain (S $\Delta$ , JV4044) and the S $\Delta$  strain expressing *dotU* and *icmF* from the chromosome (S $\Delta$ (UF), JV5319) was determined from three independent experiments (n=3) (100 cells counted from each experiment). Data are presented as means  $\pm$  SEM. P value indicates statistical difference compared to the wild-type strain Lp02 (WT) by unpaired two-tailed Student's t-test.

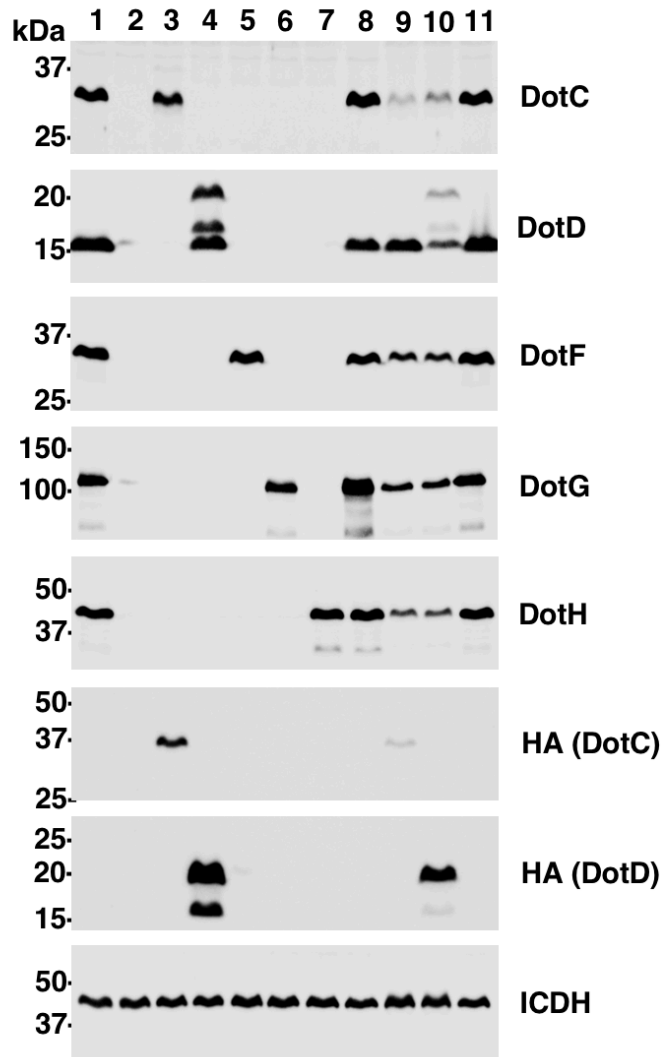

**Supplementary Figure 22. Expression of the correct components in the SΔ(UF) strain for Figure 4.** *L. pneumophila* strains were grown to late exponential phase and westerns were done with the indicated antibodies. ICDH, a cytoplasmic housekeeping protein, was used as a loading control. Samples were loaded in the following order: 1. JV1139 (Lp02 + pJB908), 2. JV5402 (SΔ(UF) + vector), 3. JV5410 (SΔ(UF) + *dotC:HA3X*), 4. JV5411 (SΔ(UF) + *dotD:HA3X*), 5. JV5403 (SΔ(UF) + *dotF*), 6. JV5404 (SΔ(UF) + *dotG*), 7. JV5405 (SΔ(UF) + *dotH*), 8. JV5443 (SΔ(UF) + *dotCDFGH*), 9. JV5750 (SΔ(UF) + *dotC:HA3x dotD dotH*), 10. JV5751 (SΔ(UF) + *dotD:HA3x dotC dotH*), 11. JV1139 (Lp02 + pJB908). Each of these experiments were done three times and representative blots are shown.

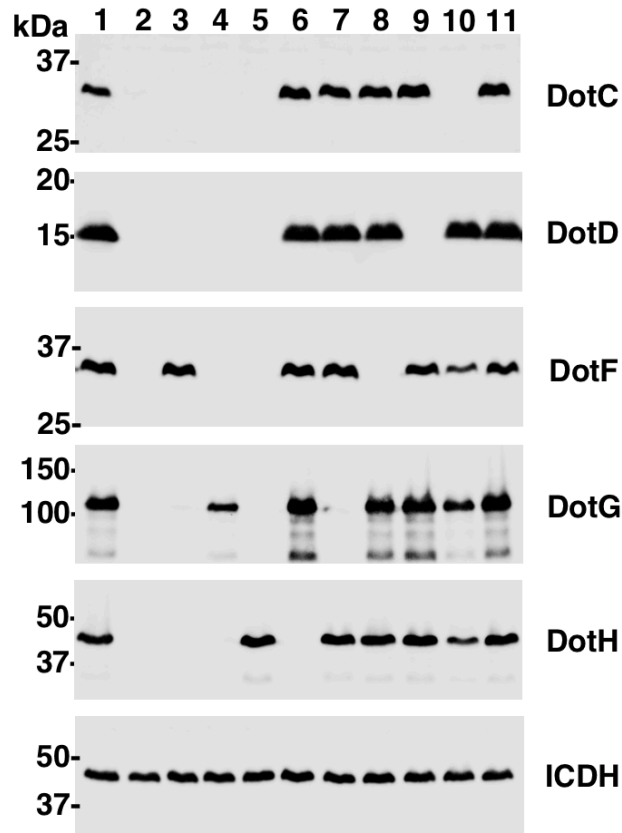

**Supplementary Figure 23. Expression of the correct single and quadruple combinations in the reconstituted  $S\Delta(UF)$  strain for Figure 5 and Supplementary Figure 28.** *L. pneumophila* strains were grown to late exponential phase and westerns were done with the indicated antibodies. ICDH, a cytoplasmic housekeeping protein, was used as a loading control. Samples were loaded in the following order: 1. JV1139 (Lp02 + pJB908), 2. JV5402 ( $S\Delta(UF)$  + vector), 3. JV5403 ( $S\Delta(UF)$  + *dotF*), 4. JV5404 ( $S\Delta(UF)$  + *dotG*), 5. JV5405 ( $S\Delta(UF)$  + *dotH*), 6. JV5468 ( $S\Delta(UF)$  + *dotCDFG*), 7. JV5466 ( $S\Delta(UF)$  + *dotCDFH*), 8. JV5475 ( $S\Delta(UF)$  + *dotCDGH*), 9. JV5439 ( $S\Delta(UF)$  + *dotCFGH*), 10. JV5441 ( $S\Delta(UF)$  + *dotDFGH*), 11. JV5443 ( $S\Delta(UF)$  + *dotCDFGH*). Each of these experiments were done three times and representative blots are shown.

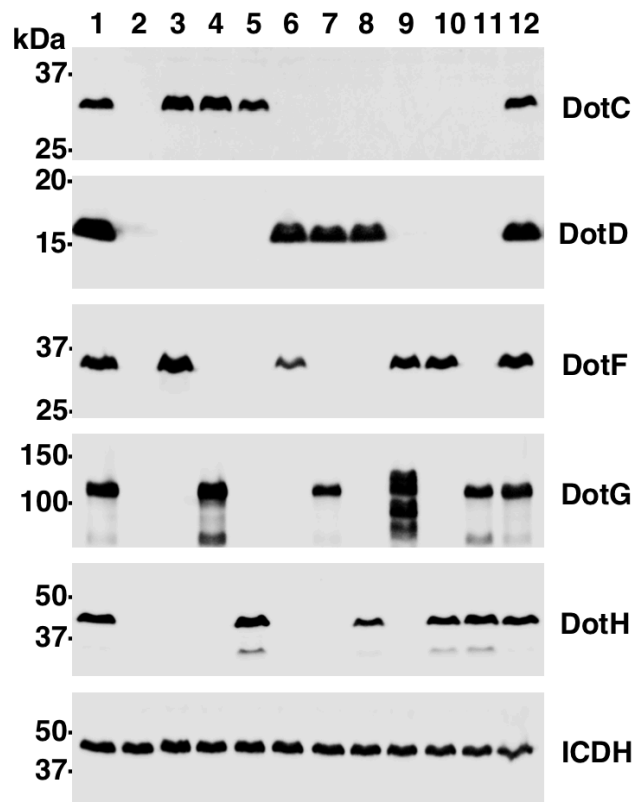

**Supplementary Figure 24. Expression of the correct double combinations in the reconstituted SΔ(UF) strain for Figure 5 and Supplementary Figure 28.** *L. pneumophila* strains were grown to late exponential phase and westerns were done with the indicated antibodies. ICDH, a cytoplasmic housekeeping protein, was used as a loading control. Samples were loaded in the following order: 1. JV1139 (Lp02 + pJB908), 2. JV5402 (SΔ(UF) + vector), 3. JV5452 (SΔ(UF) + *dotCF*), 4. JV5455 (SΔ(UF) + *dotCG*), 5. JV5458 (SΔ(UF) + *dotCH*), 6. JV5453 (SΔ(UF) + *dotDF*), 7. JV5456 (SΔ(UF) + *dotDG*), 8. JV5459 (SΔ(UF) + *dotDH*), 9. JV5408 (SΔ(UF) + *dotFG*), 10. JV5407 (SΔ(UF) + *dotFH*), 11. JV5406 (SΔ(UF) + *dotGH*), 12. JV1139 (Lp02 + pJB908). Each of these experiments were done three times and representative blots are shown.

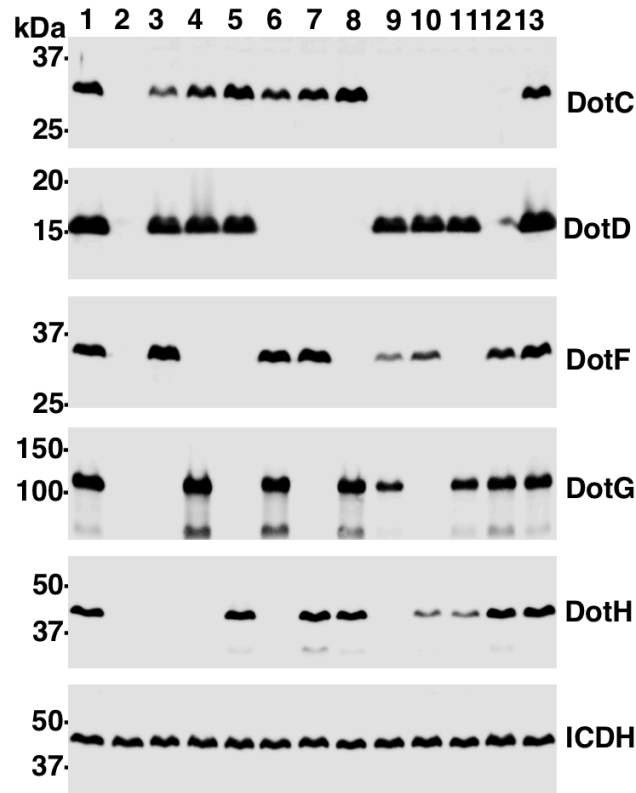

**Supplementary Figure 25. Expression of the correct triple combinations in the reconstituted  $S\Delta(UF)$  strain for Figure 5 and Supplementary Figure 28.** *L. pneumophila* strains were grown to late exponential phase and westerns were done with the indicated antibodies. ICDH, a cytoplasmic housekeeping protein, was used as a loading control. Samples were loaded in the following order: 1. JV1139 (Lp02 + pJB908), 2. JV5402 ( $S\Delta(UF)$  + vector), 3. JV5454 ( $S\Delta(UF)$  + *dotCDF*), 4. JV5457 ( $S\Delta(UF)$  + *dotCDG*), 5. JV5460 ( $S\Delta(UF)$  + *dotCDH*), 6. JV5467 ( $S\Delta(UF)$  + *dotCFG*), 7. JV5464 ( $S\Delta(UF)$  + *dotCFH*), 8. JV5473 ( $S\Delta(UF)$  + *dotCGH*), 9. JV5472 ( $S\Delta(UF)$  + *dotDFG*), 10. JV5465 ( $S\Delta(UF)$  + *dotDFH*), 11. JV5474 ( $S\Delta(UF)$  + *dotDGH*), 12. JV5409 ( $S\Delta(UF)$  + *dotFGH*), 13. JV1139 (Lp02 + pJB908). Each of these experiments were done three times and representative blots are shown.

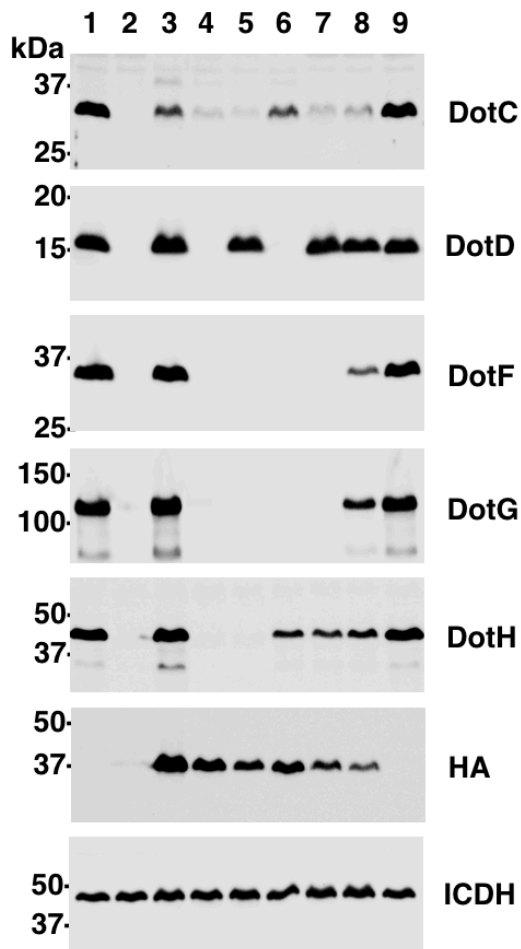

**Supplementary Figure 26. Expression of the correct components in the reconstituted S $\Delta$ (UF) strain containing HA-tagged proteins Figure 5 and Supplementary Figure 28.** *L. pneumophila* strains were grown to late exponential phase and westerns were done with the indicated antibodies. ICDH, a cytoplasmic housekeeping protein, was used as a loading control. Samples were loaded in the following order: 1. JV1139 (Lp02 + pJB908), 2. JV5402 (S $\Delta$ (UF) + vector), 3. JV5484 ( $\Delta$ *dotC* + *dotC:HA3x*), 4. JV5480 (S $\Delta$ (UF) + *dotC:HA3x*), 5. JV5482 (S $\Delta$ (UF) + *dotC:HA3x dotD*), 6. JV5749 (S $\Delta$ (UF) + *dotC:HA3x dotH*), 7. JV5750 (S $\Delta$ (UF) + *dotC:HA3x dotD dotH*), 8. JV5752 (S $\Delta$ (UF) + *dotC:HA3x dotD dotFGH*), 9. JV1139 (Lp02 + pJB908). Each of these experiments were done three times and representative blots are shown.

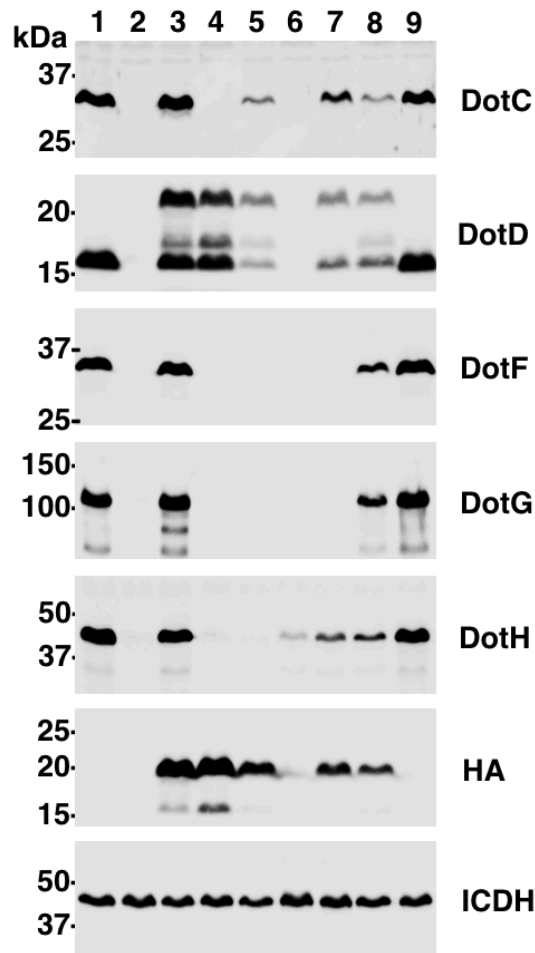

**Supplementary Figure 27. Expression of the correct components in the reconstituted S $\Delta$ (UF) strain containing HA-tagged proteins for Figure 5 and Supplementary Figure 28.** *L. pneumophila* strains were grown to late exponential phase and westerns were done with the indicated antibodies. ICDH, a cytoplasmic housekeeping protein, was used as a loading control. Samples were loaded in the following order: 1. JV1139 (Lp02 + pJB908), 2. JV5402 (S $\Delta$ (UF) + vector), 3. JV5484 ( $\Delta$ dotD + dotD:HA3x), 4. JV5480 (S $\Delta$ (UF) + dotD:HA3x), 5. JV5482 (S $\Delta$ (UF) + dotD:HA3x dotC), 6. JV5749 (S $\Delta$ (UF) + dotD:HA3x dotH), 7. JV5750 (S $\Delta$ (UF) + dotD:HA3x dotC dotH), 8. JV5752 (S $\Delta$ (UF) + dotD:HA3x dotC dotFGH), 9. JV1139 (Lp02 + pJB908). Each of these experiments were done three times and representative blots are shown.



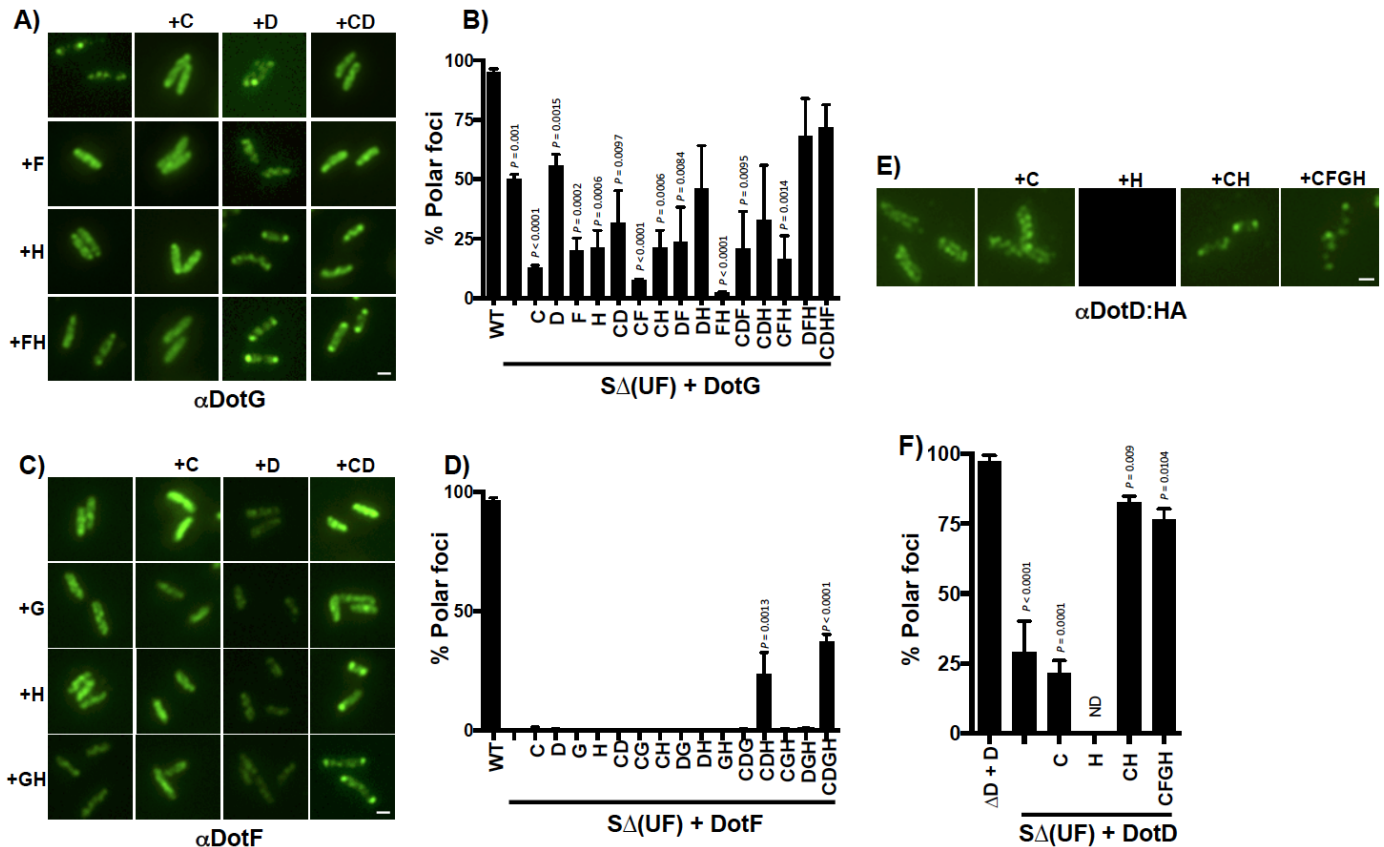

**Supplementary Figure 28. Reconstitution of the core-transmembrane subcomplex in the  $S\Delta(UF)$  strain.** Combinations of the five components of the core-transmembrane subcomplex were expressed in the super *dot/icm* deletion strain encoding *dotU* and *icmF* ( $S\Delta(UF)$ ). Representative images for DotG, DotF, and DotD-HA localization are shown (A, C, E, respectively). Proteins expressed in each strain is indicated by labels on the left and top of each panel and the protein localized by IFM is shown below the images. The percent of cells having polar localization of the Dot proteins was determined from three independent experiments ( $n=3$ ) (100 cells counted from each experiment) and are shown in panels B, D, and F. Data are presented as means  $\pm$  SEM. P value indicates statistical difference compared to the wild-type strain Lp02 (WT) by unpaired two-tailed Student's t-test. Scale bar: 2  $\mu$ m.

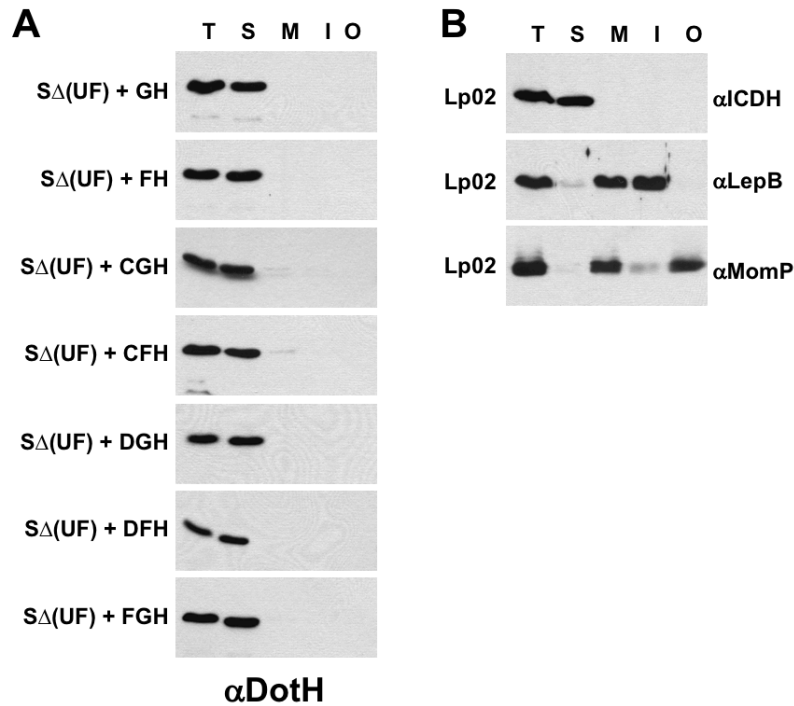

**Supplementary Figure 29. DotH localization to the outer membrane requires the anchor proteins DotU and IcmF.** Cells were fractionated by a combination of ultracentrifugation and Triton X-100 solubility, proteins were separated by SDS-PAGE and probed in westerns using DotH specific antibodies. (A) S $\Delta$ (UF) strains that did not restore DotH outer membrane localization include: DotG/DotH (JV5406), DotF/DotH (JV5407), DotC/DotG/DotH (JV5460), DotC/DotF/DotH (JV5464), DotG/DotF/DotH (JV5409), DotD/DotF/DotH (JV5465) and DotF/DotG/DotH (JV5409). (B) Controls for the fractionations are shown and include the cytoplasmic protein isocitrate dehydrogenase (ICDH), the inner membrane protein LepB and the outer membrane protein MomP. Experiments were done in triplicate and representative images are shown. Each of these experiments were done three times and representative blots are shown.

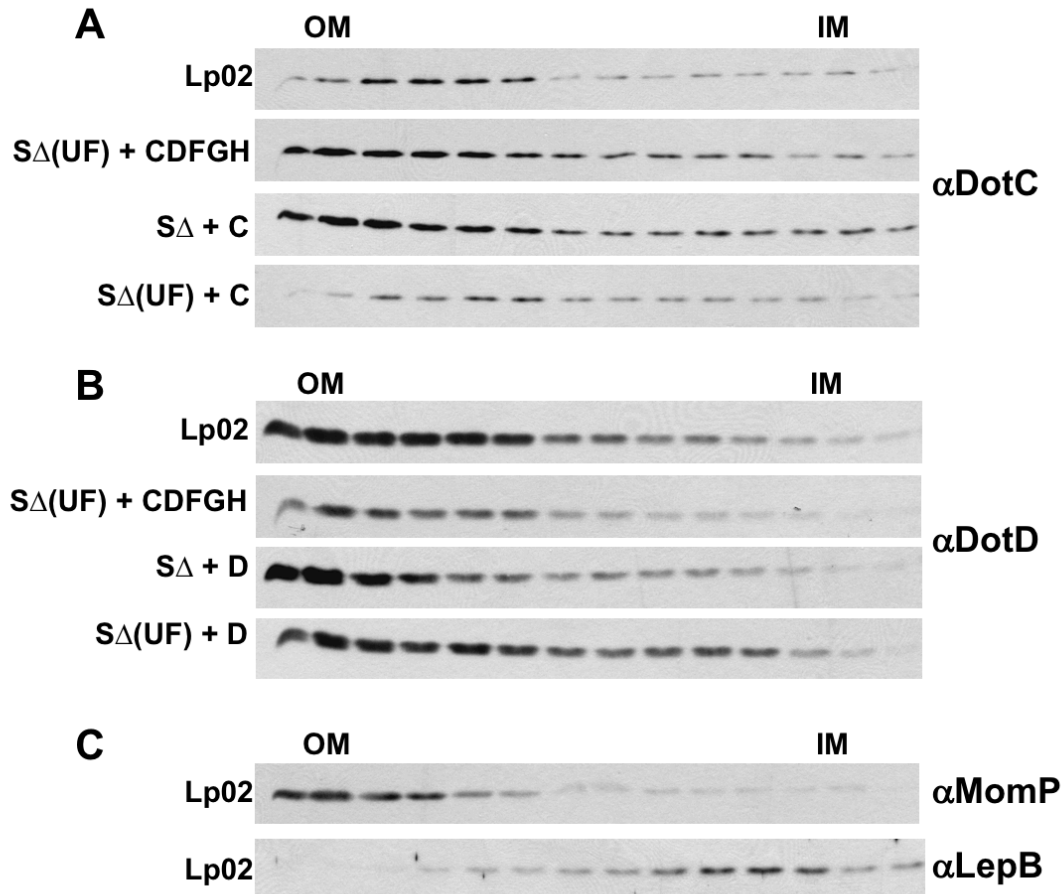

**Supplementary Figure 30.** Lipoproteins DotC and DotD remain in the outer membrane in the presence and absence of DotU and IcmF. Strains were grown to late exponential phase, total membrane was isolated and separated by sucrose density gradient. Fractions were then separated by SDS-PAGE and probed using DotC or DotD specific antibodies (indicated to the right of the blots). (A) Wild-type *Legionella* Lp02, S $\Delta$ (UF) + core (JV5443), S $\Delta$  + DotC (JV4225), and S $\Delta$ (UF) + DotC (JV5410). (B) Wild-type *Legionella* Lp02, S $\Delta$ (UF) + core (JV5443), S $\Delta$  + DotD (JV4695), and S $\Delta$ (UF) + DotD (JV5411). (C) Controls include the outer membrane protein MomP and the inner membrane protein LepB. Each of these experiments were done three times and representative blots are shown.

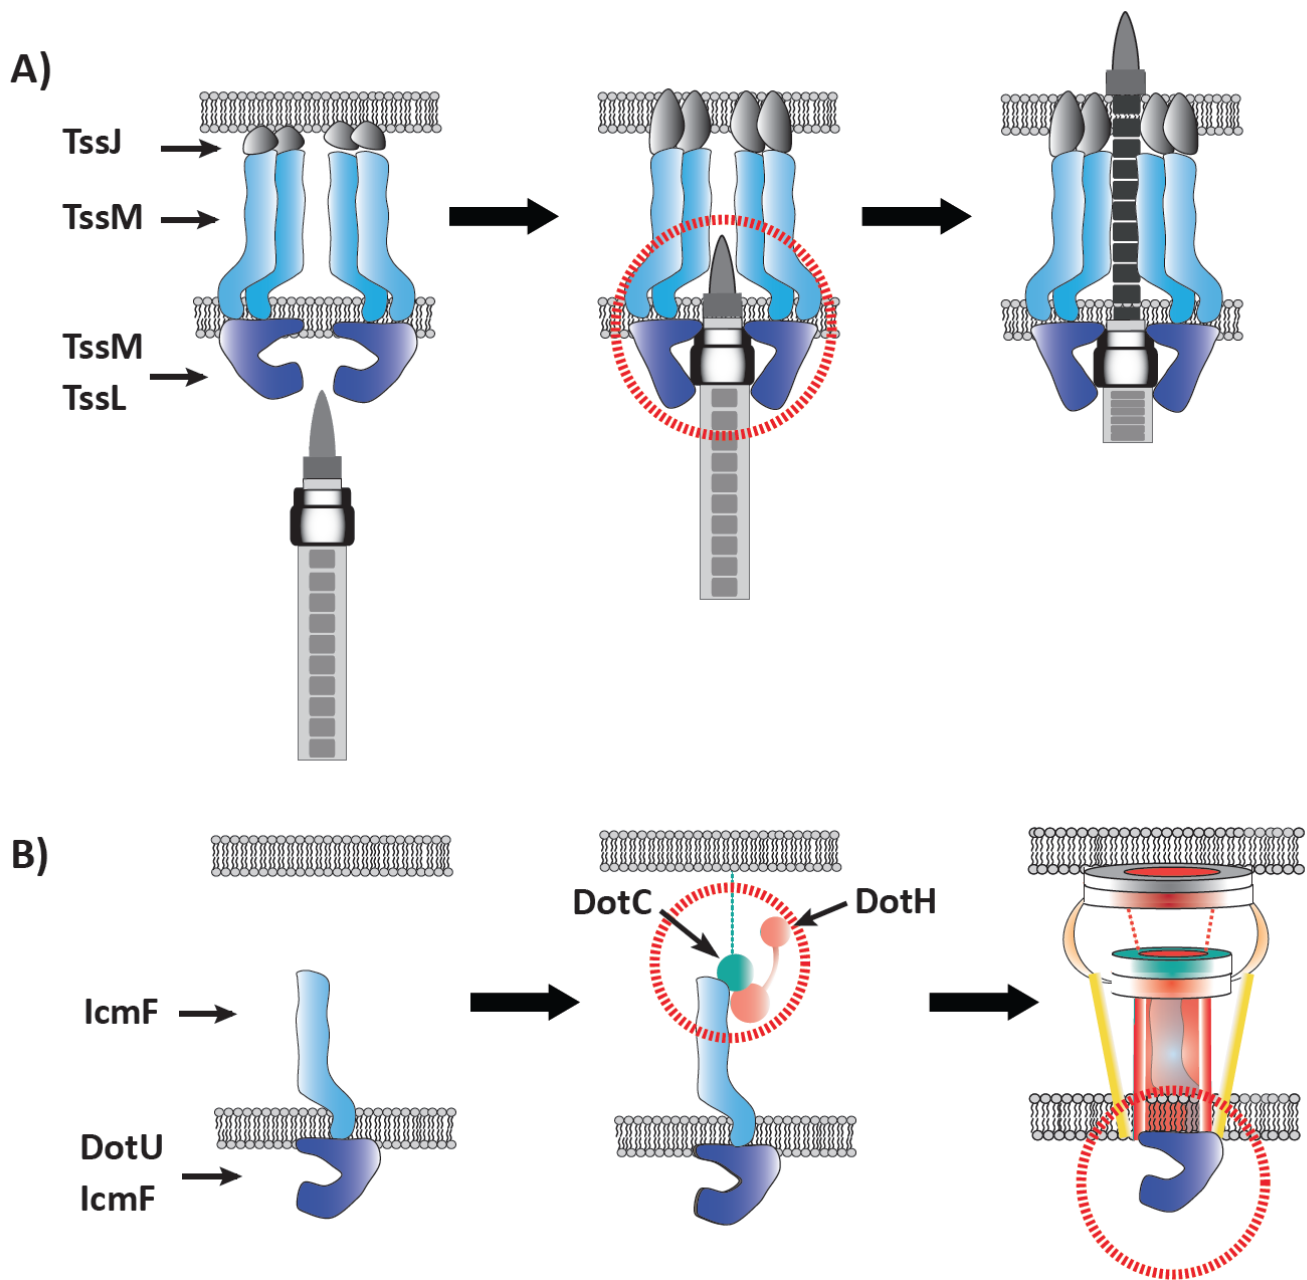

**Supplementary Figure 31. A-B Polar targeting and assembly of the *Legionella* core-transmembrane subcomplex by DotU and IcmF.** (A) The T6SS core membrane complex is made up of TssJ, TssL, and TssM and is used as a docking station for the baseplate and tail (red circle). (B) DotU and IcmF resemble components of the T6SS core membrane complex but lack a homolog to the lipoprotein TssJ. Instead DotU and IcmF recruit the lipoprotein DotC and DotH (red circle in the center panel). Upon assembly of the *Legionella* core transmembrane complex, it is possible that the cytoplasmic domains of DotU and IcmF recruit additional components of the Dot/Icm apparatus (red circle in the right panel).

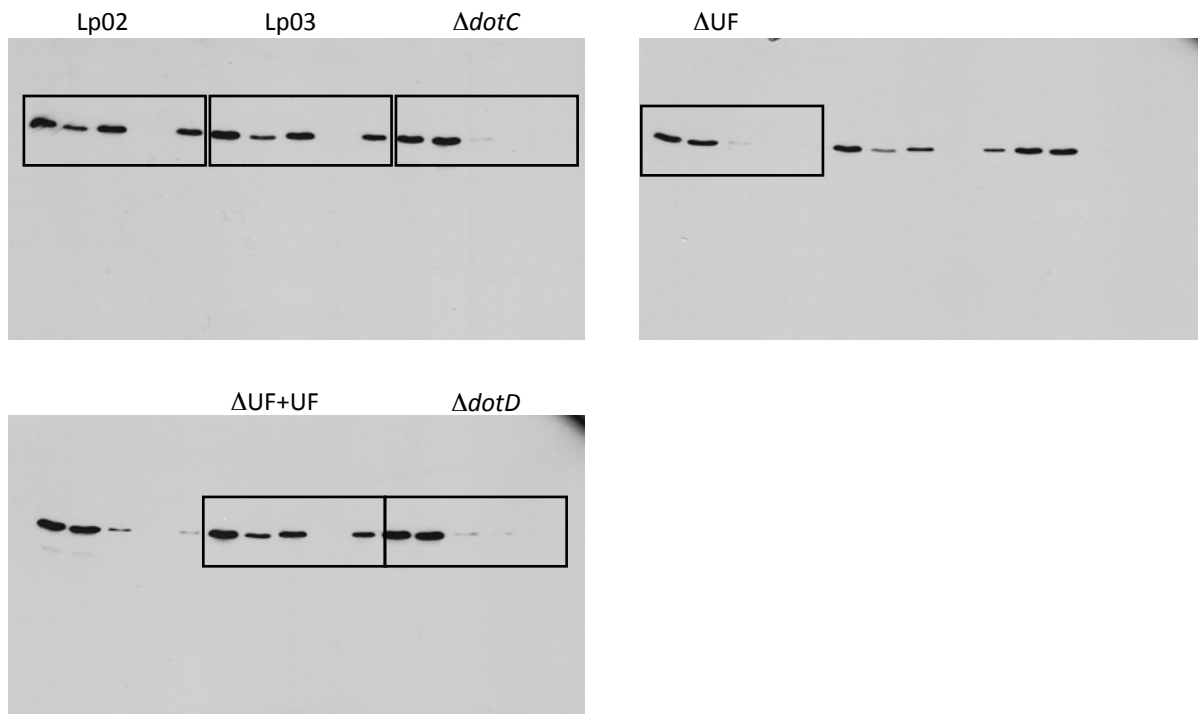

**Supplementary Figure 32A.** Full length western blots used to generate Fig. 5E ( $\alpha$ DotH). Boxes represent the sections that were used.

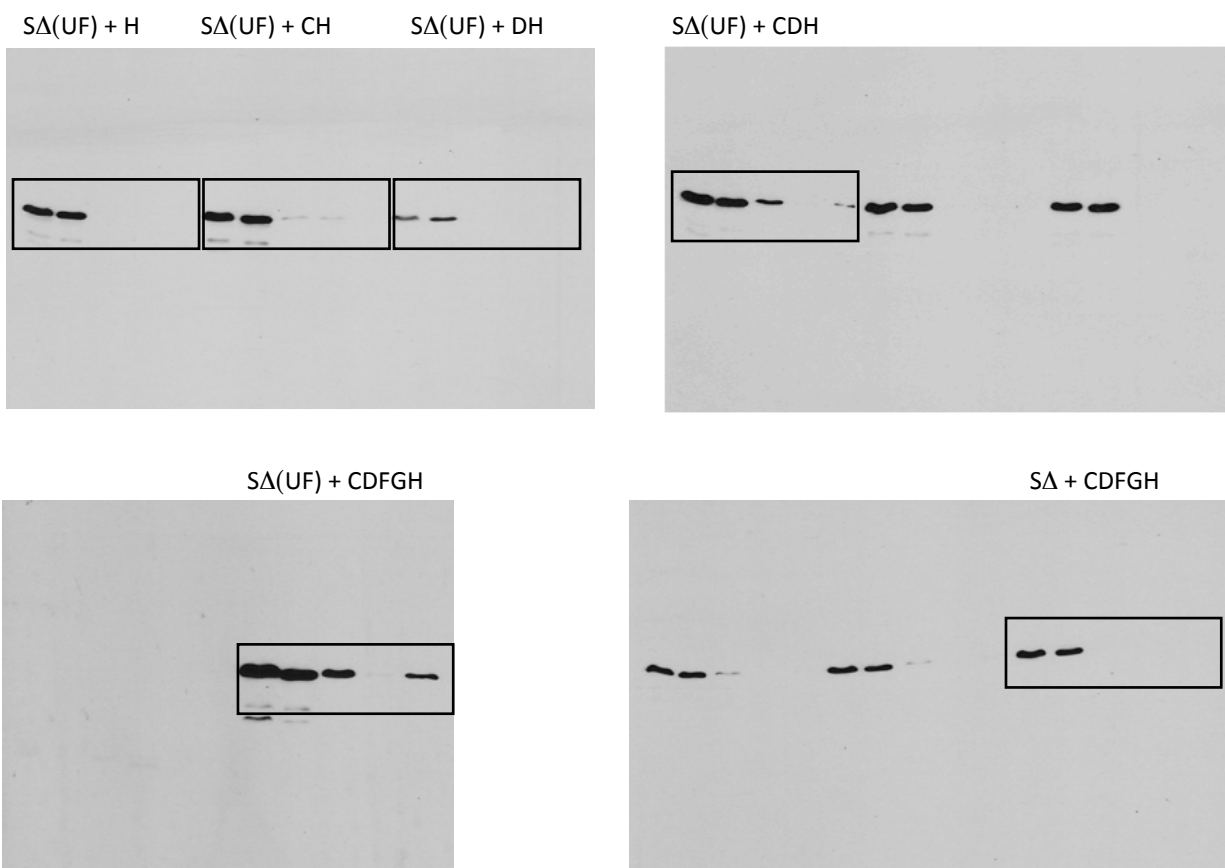

**Supplementary Figure 32B.** Full length western blots used to generate Fig. 5F ( $\alpha$ DotH). Boxes represent the sections that were used.

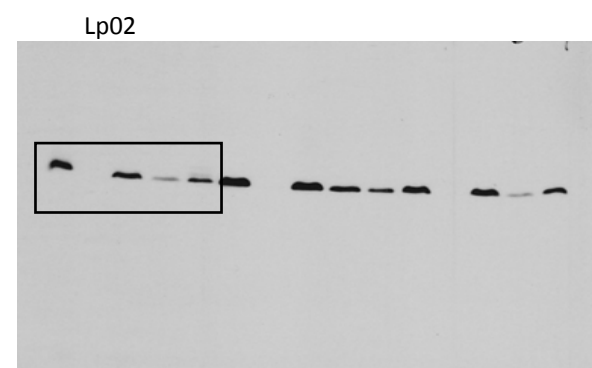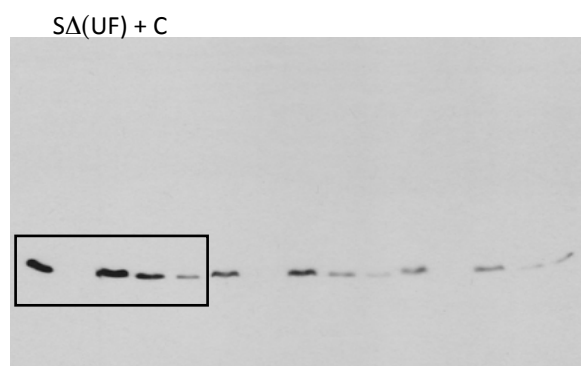

SA(UF) + CDH      SA(UF) + CD

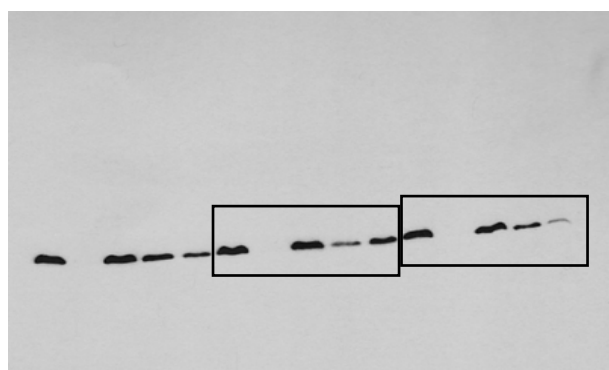

SA(UF) + CDFGH

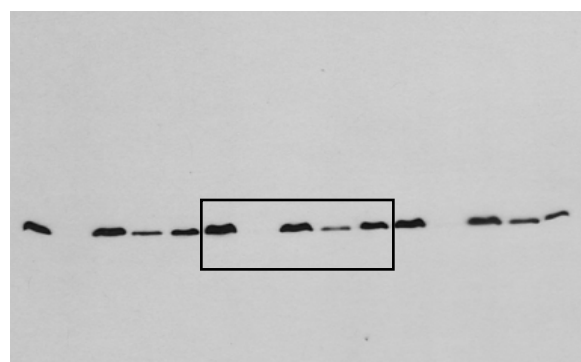

SA + CDFGH

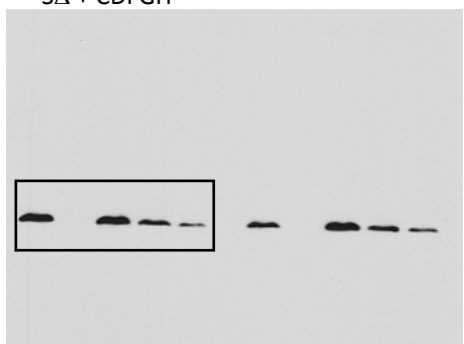

**Supplementary Figure 32C.** Full length western blots used to generate Fig. 5G ( $\alpha$ DotC). Boxes represent the sections that were used.

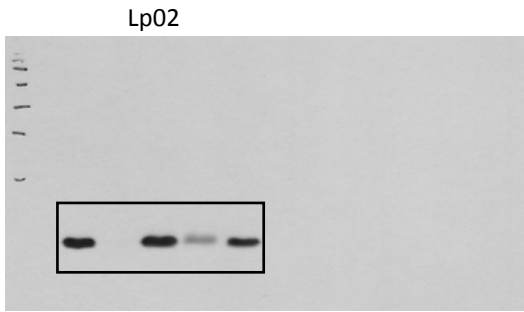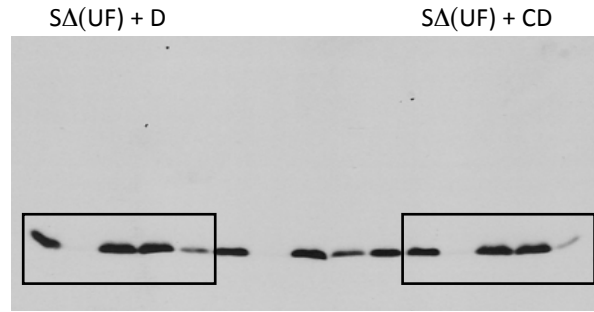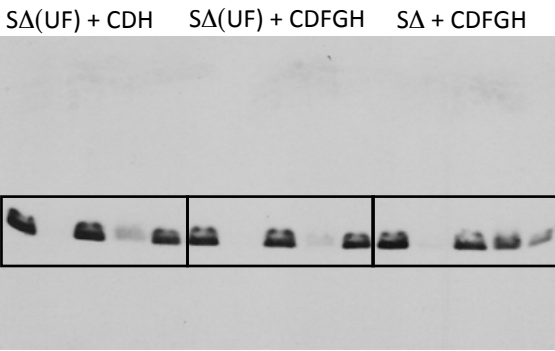

**Supplementary Figure 32D.** Full length western blots used to generate Fig. 5H ( $\alpha$ DotD). Boxes represent the sections that were used.



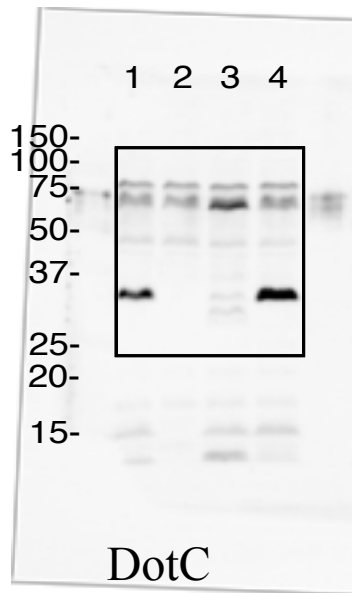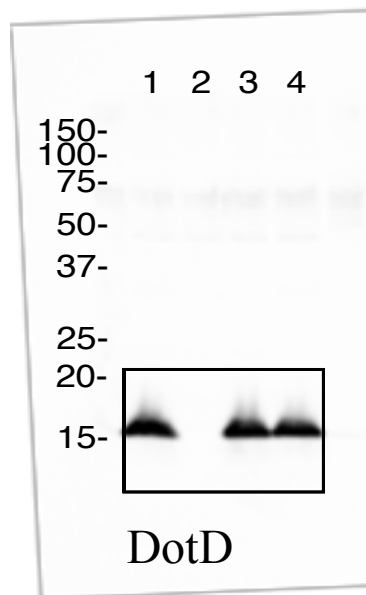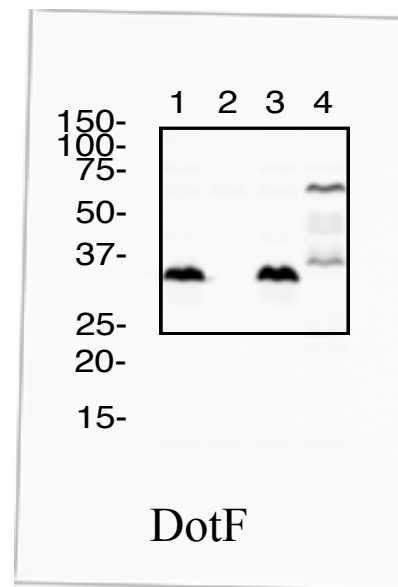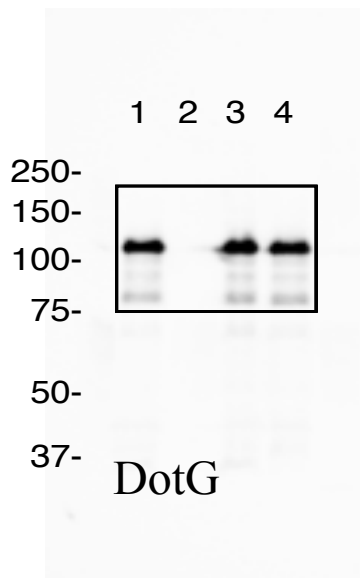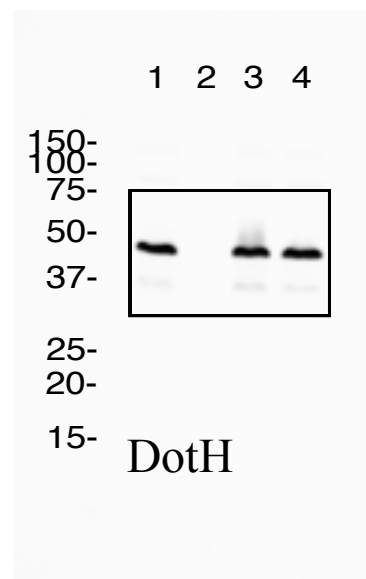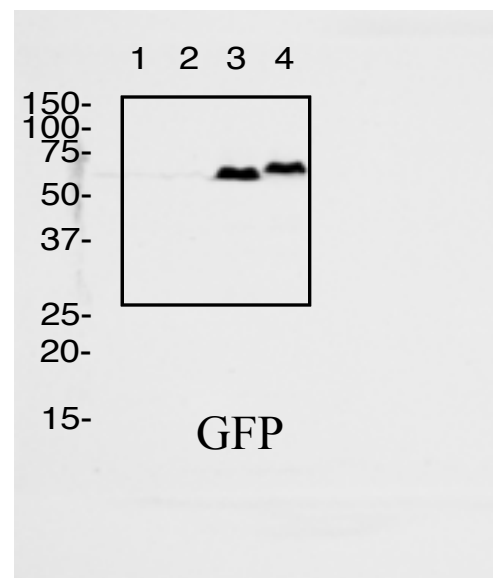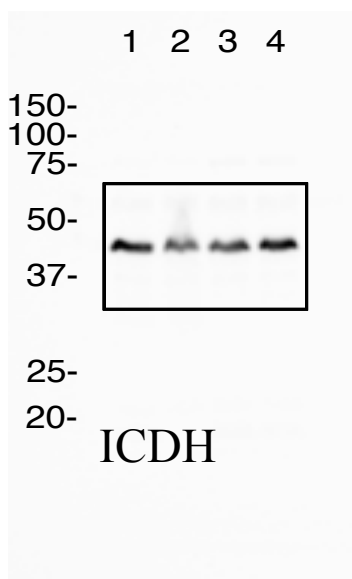

**Supplementary Figure 32E.** Full length western blots used to generate Supplementary Figure 2a. Boxes represent the sections that were used.

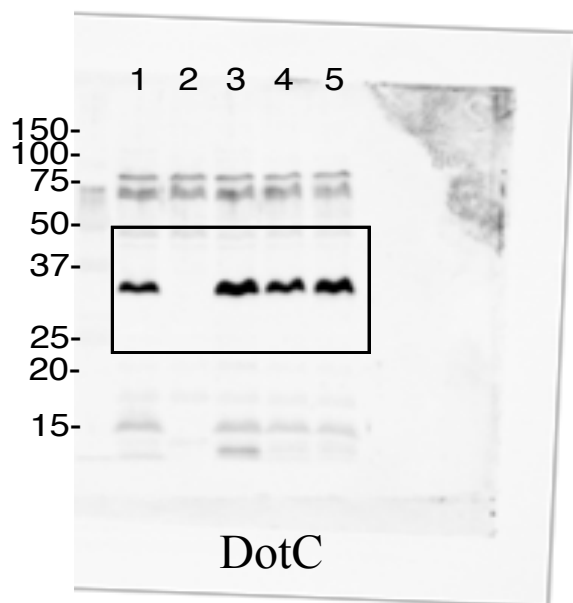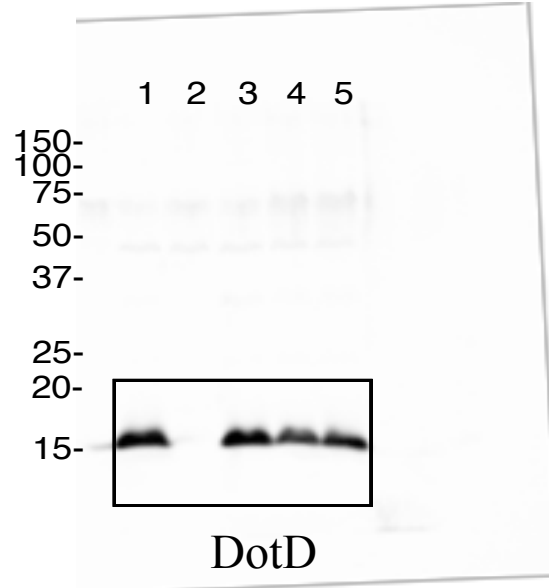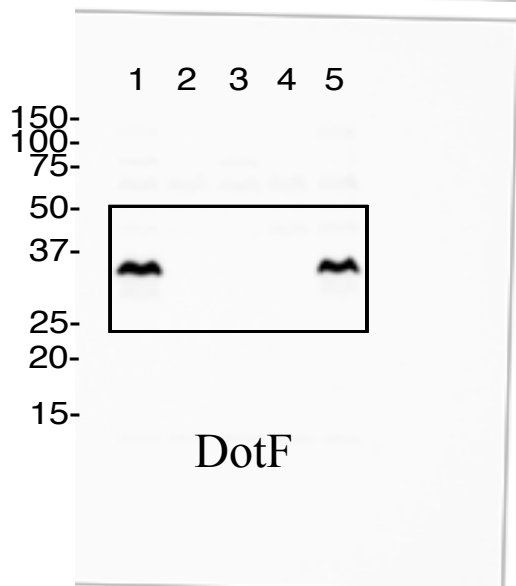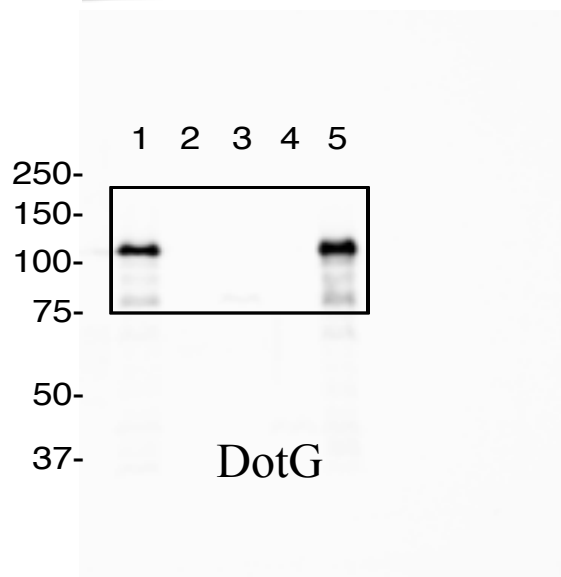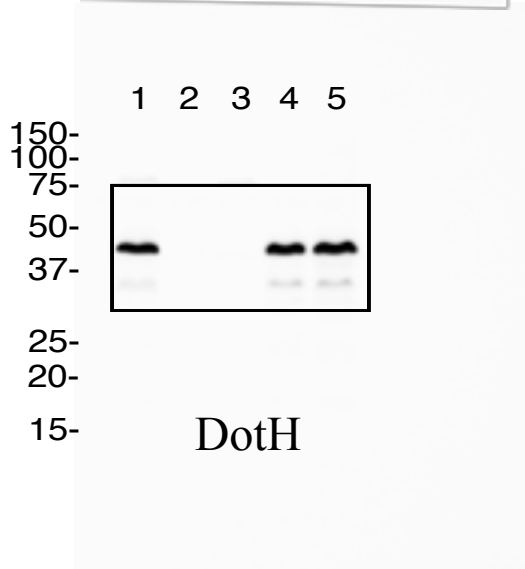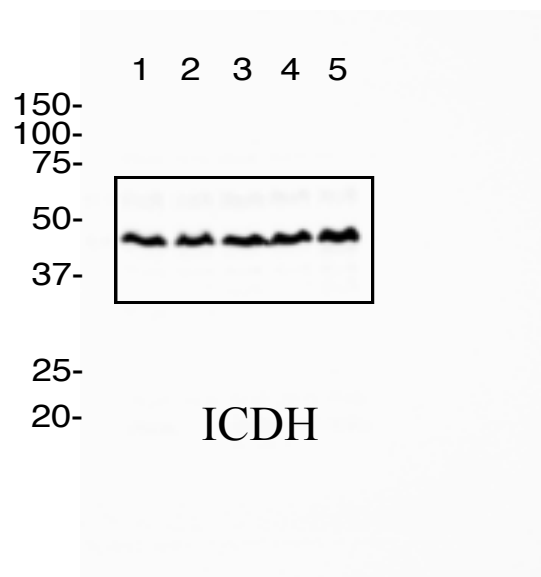

**Supplementary Figure 32F.** Full length western blots used to generate Supplementary Figure 2b. Boxes represent the sections that were used.

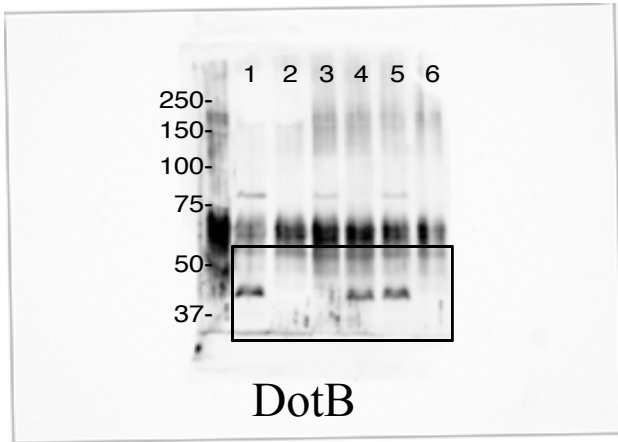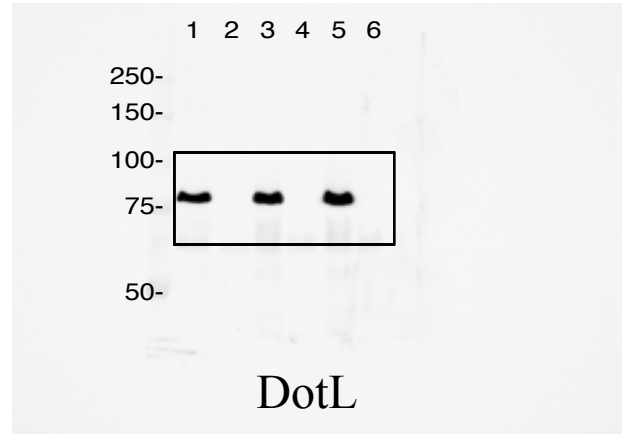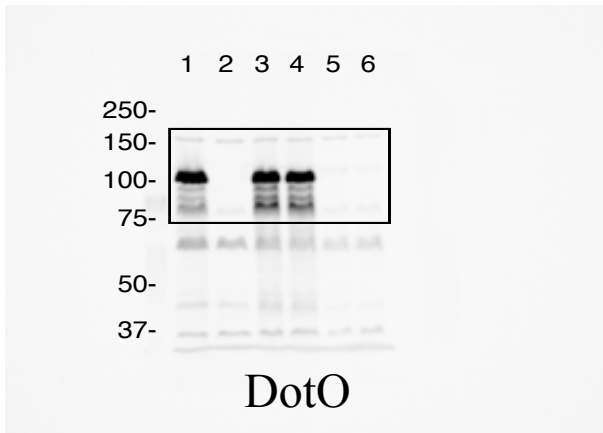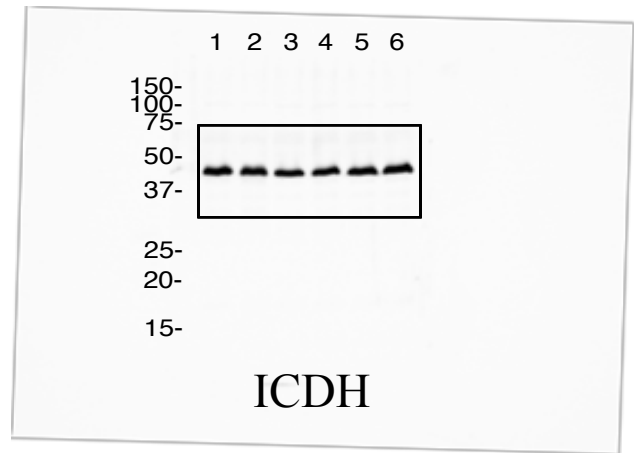

**Supplementary Figure 32G.** Full length western blots used to generate Supplementary Figure 2c. Boxes represent the sections that were used.

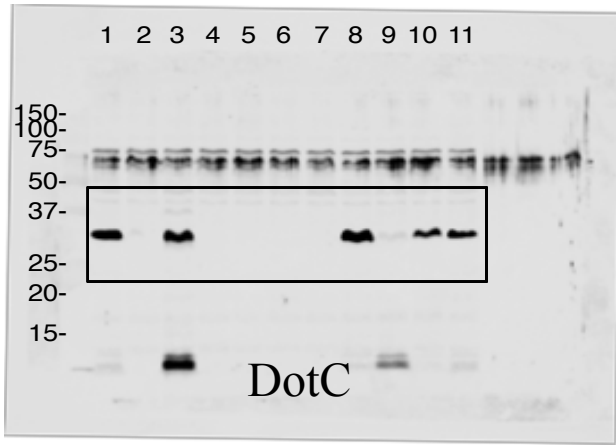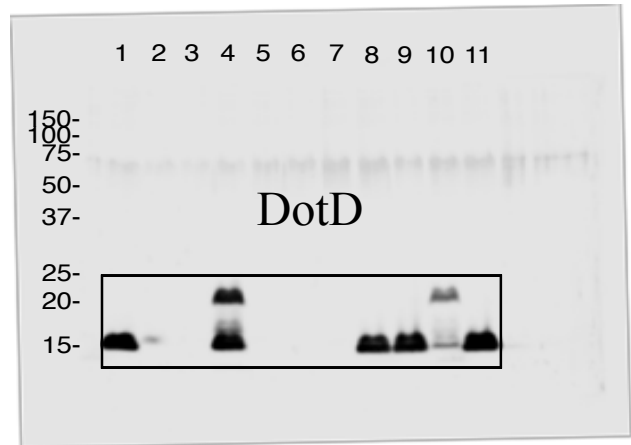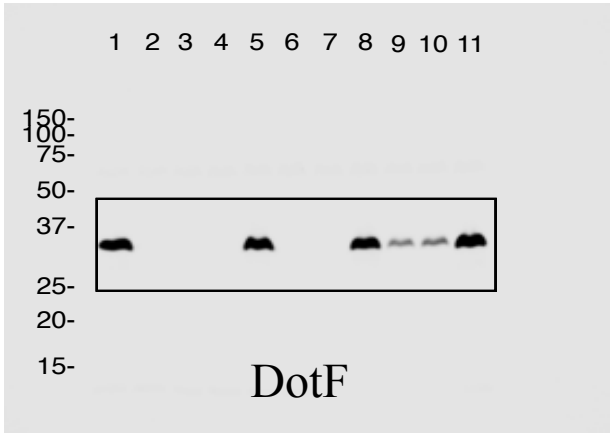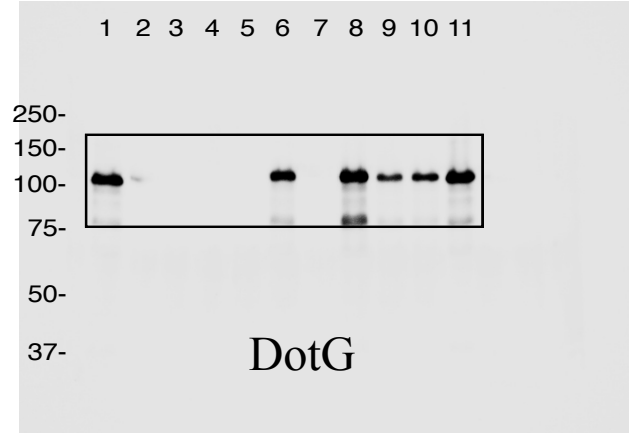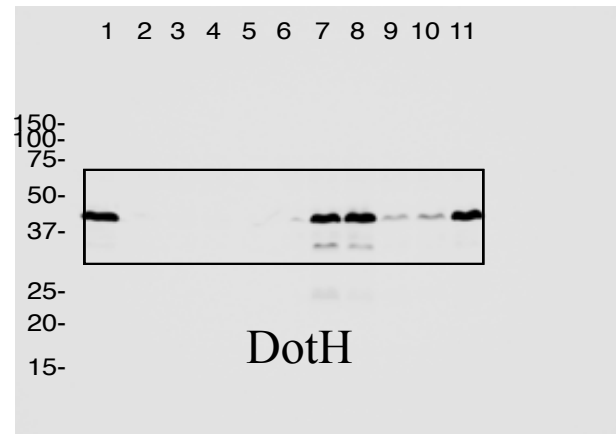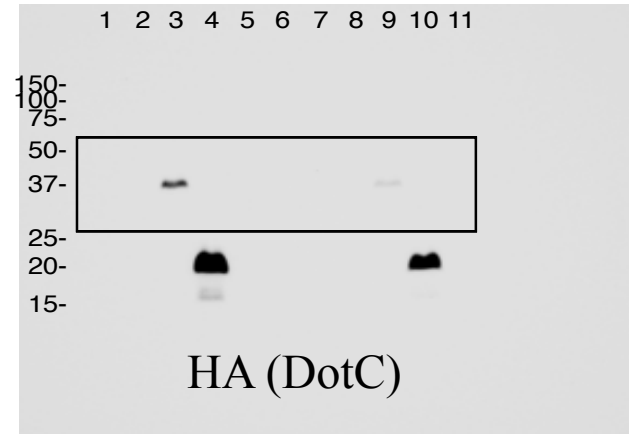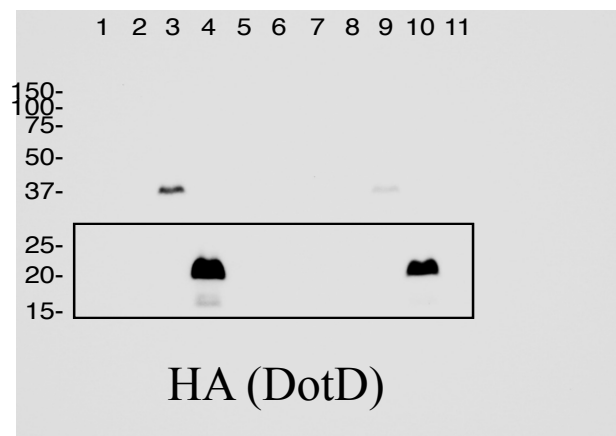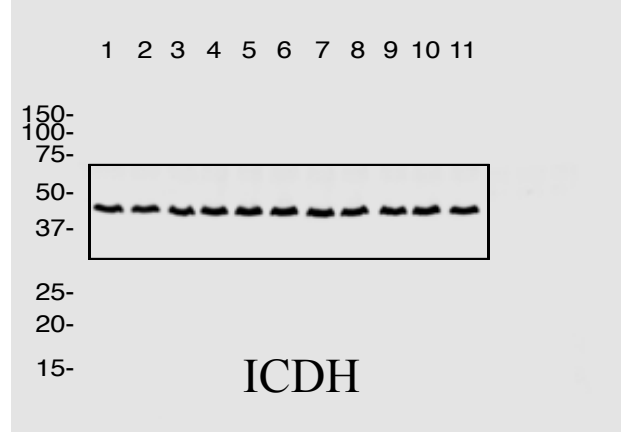

**Supplementary Figure 32H.** Full length western blots used to generate Supplementary Figure 14. Boxes represent the sections that were used.

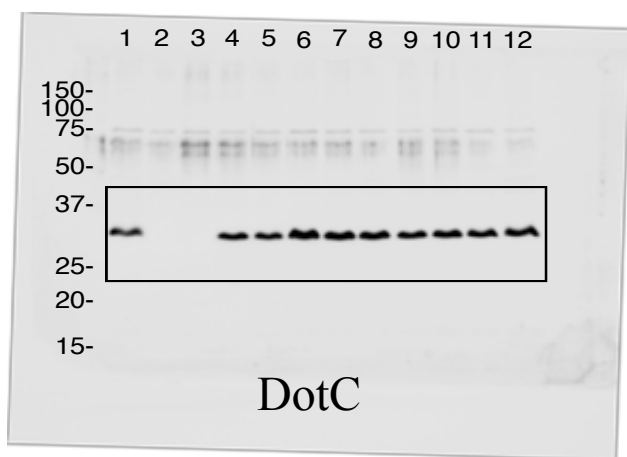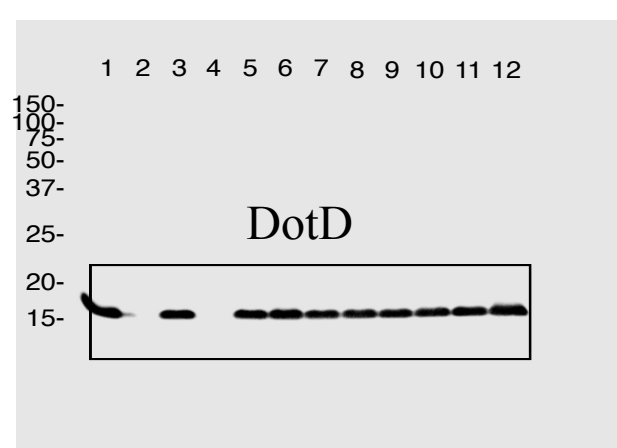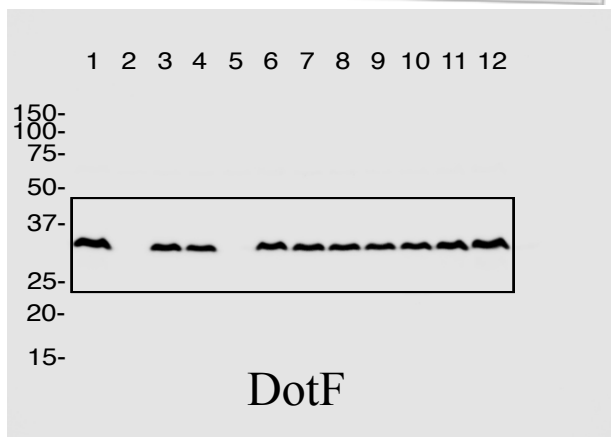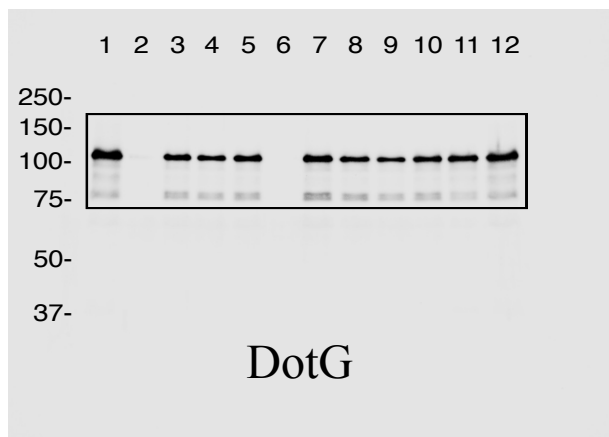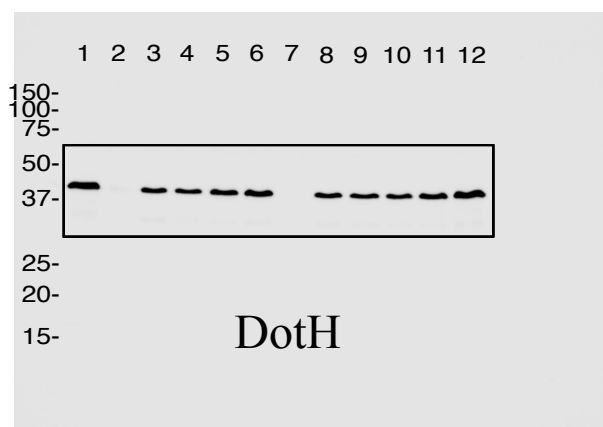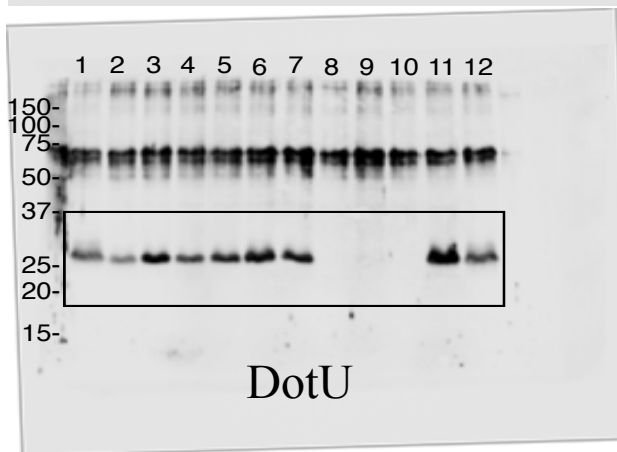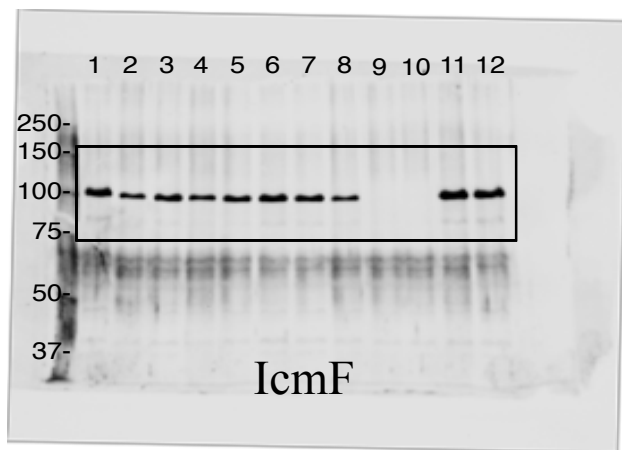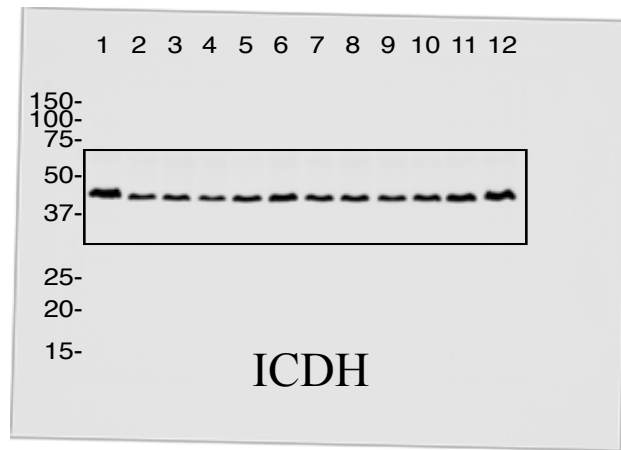

**Supplementary Figure 32I.** Full length western blots used to generate Supplementary Figure 18. Boxes represent the sections that were used.

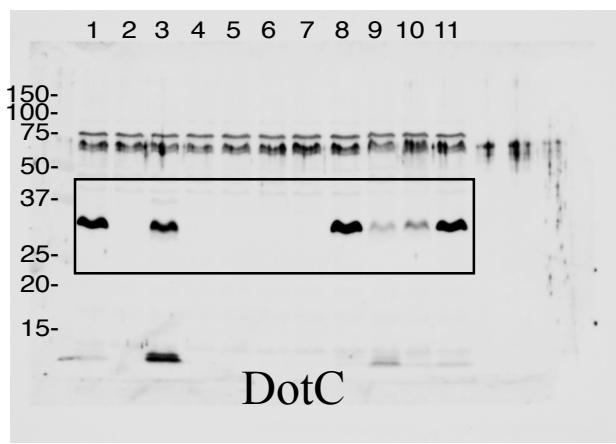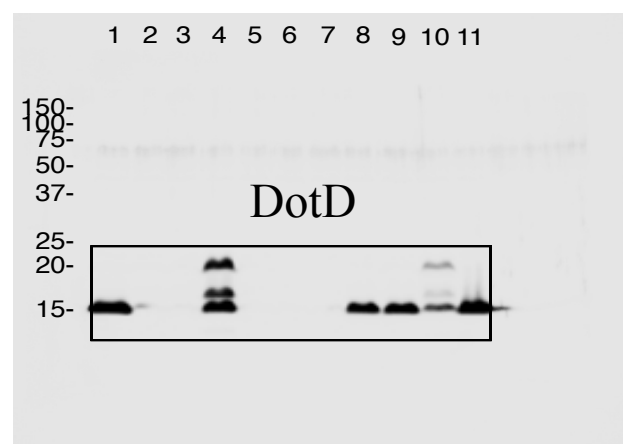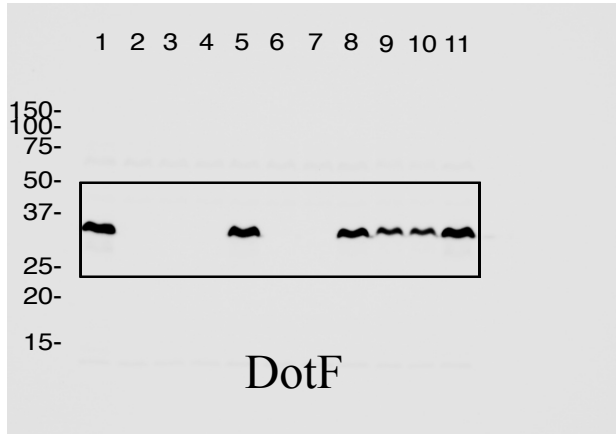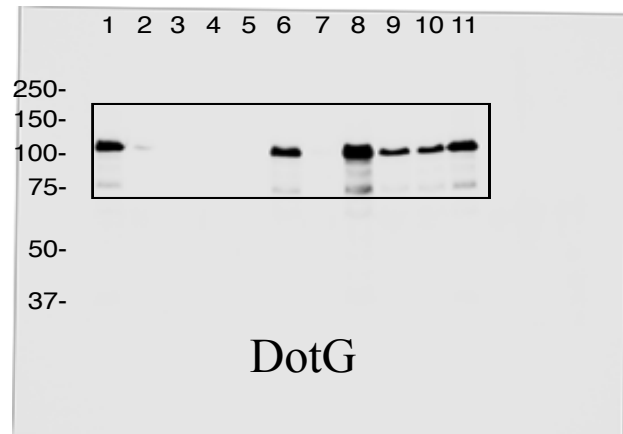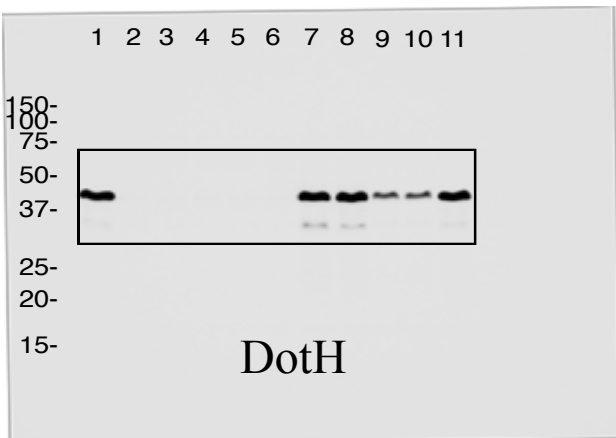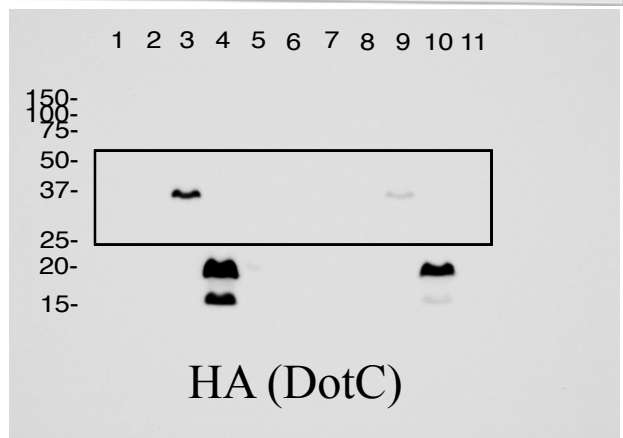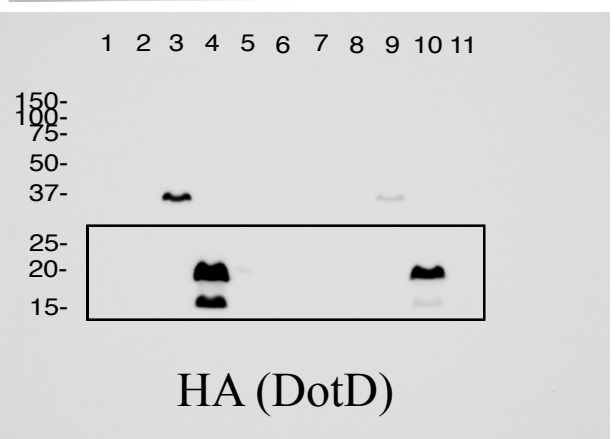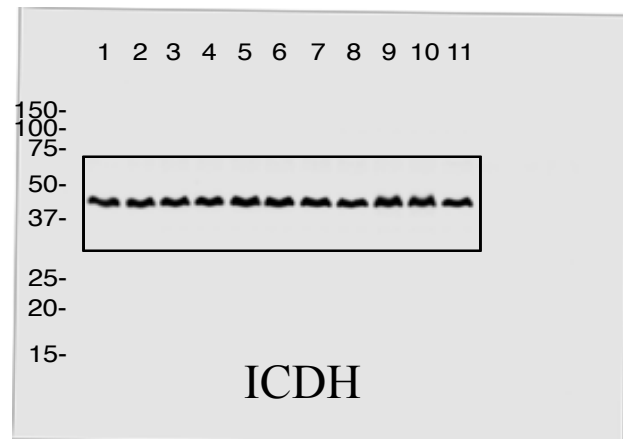

**Supplementary Figure 32J.** Full length western blots used to generate Supplementary Figure 22. Boxes represent the sections that were used.

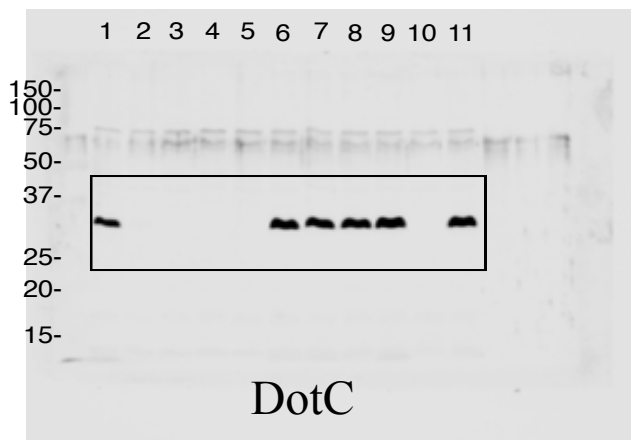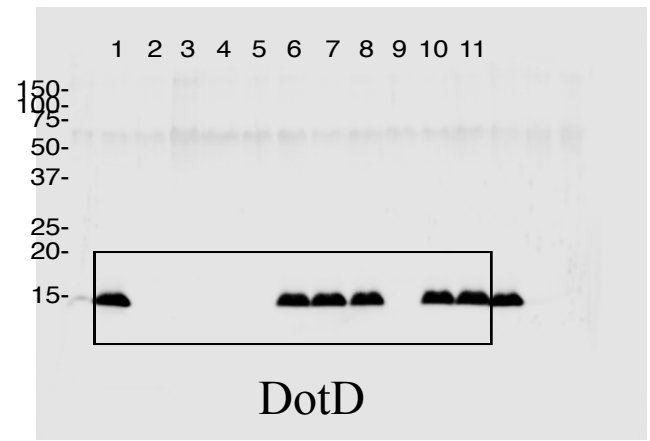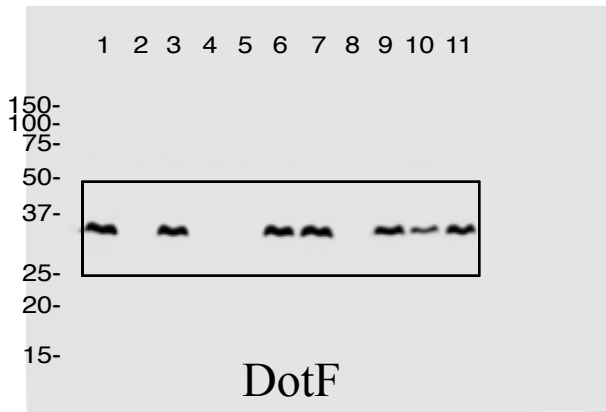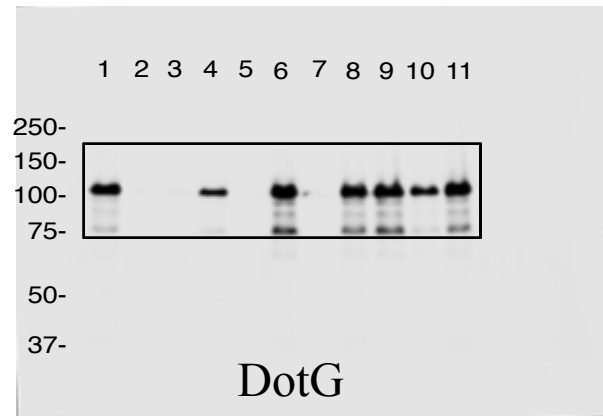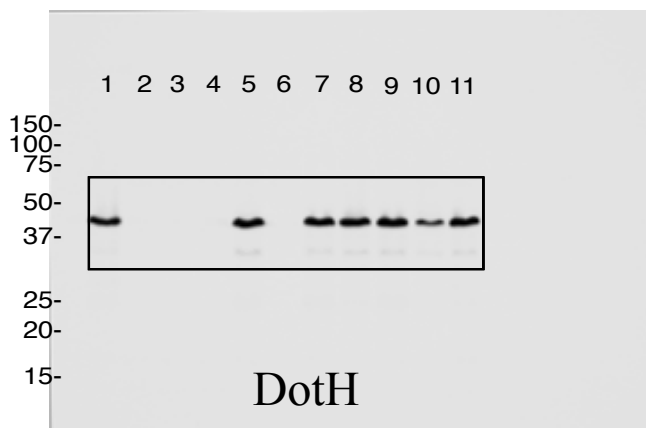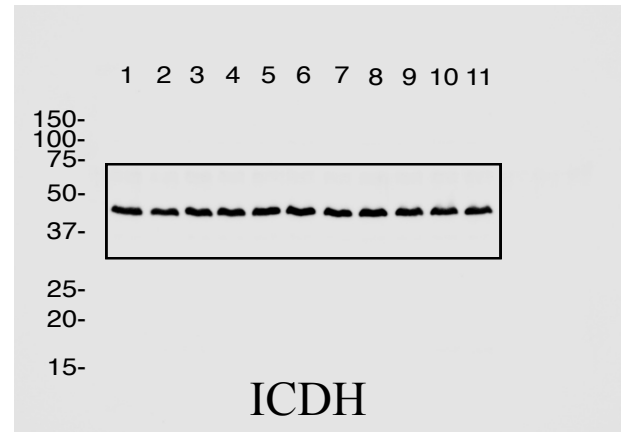

**Supplementary Figure 32K.** Full length western blots used to generate Supplementary Figure 23. Boxes represent the sections that were used.

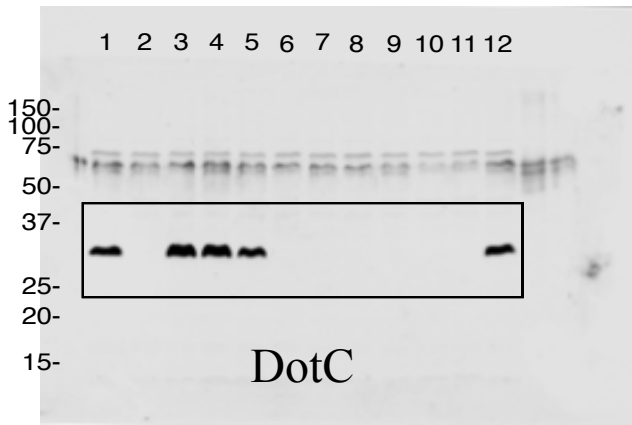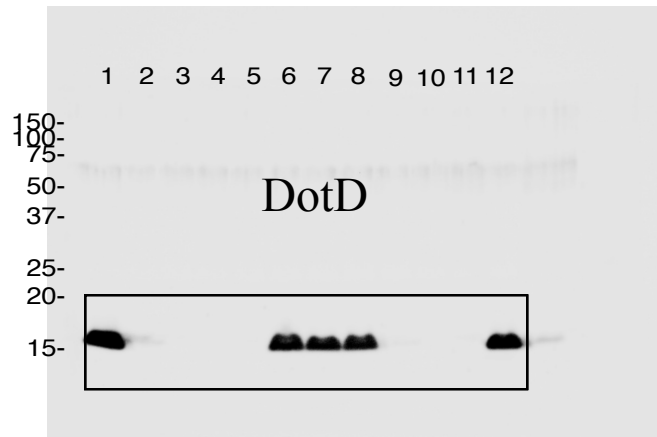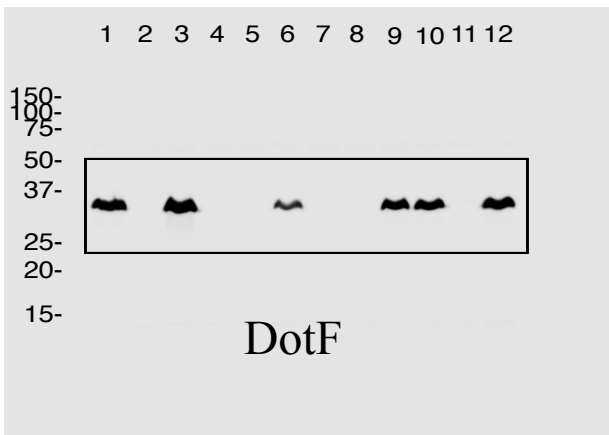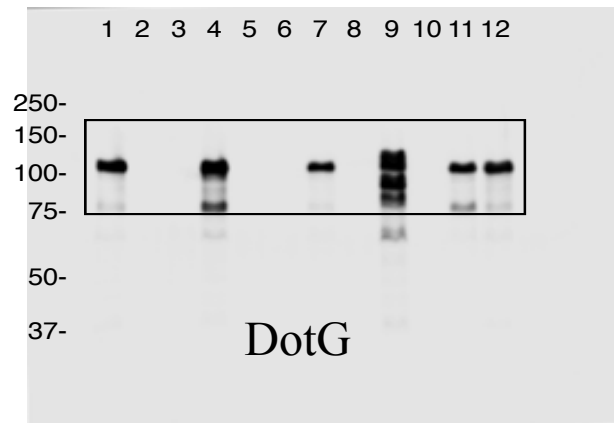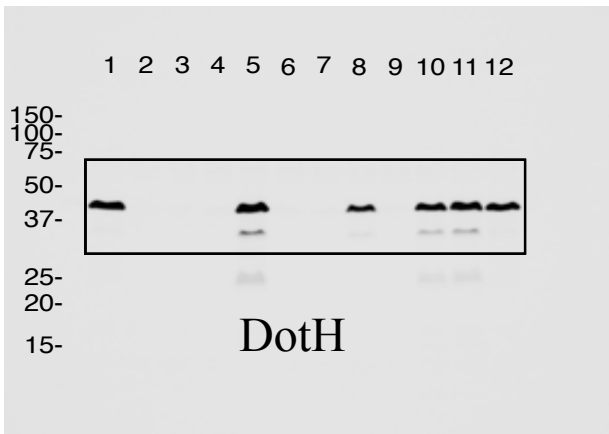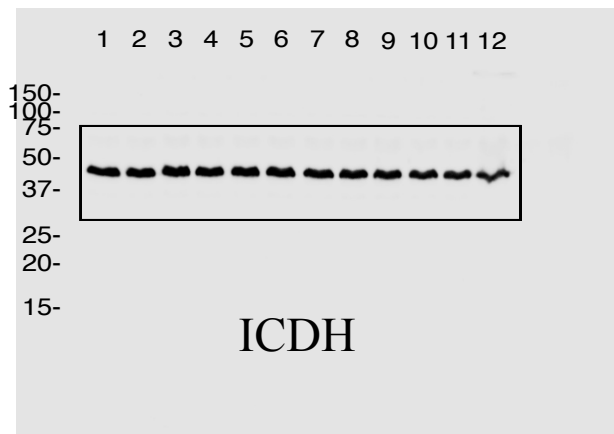

**Supplementary Figure 32L.** Full length western blots used to generate Supplementary Figure 24. Boxes represent the sections that were used.



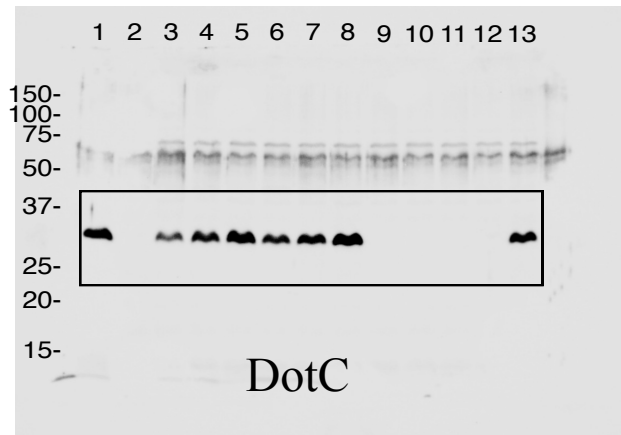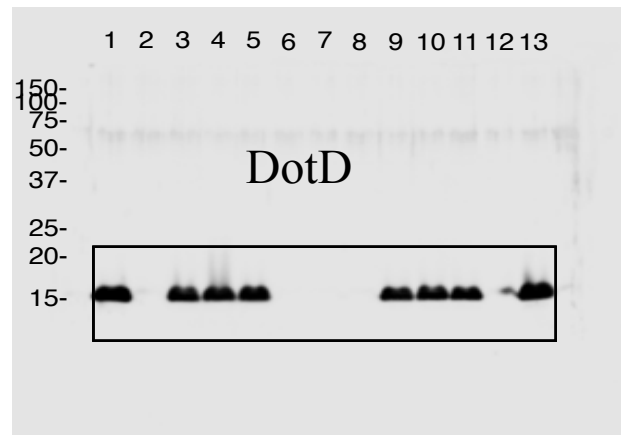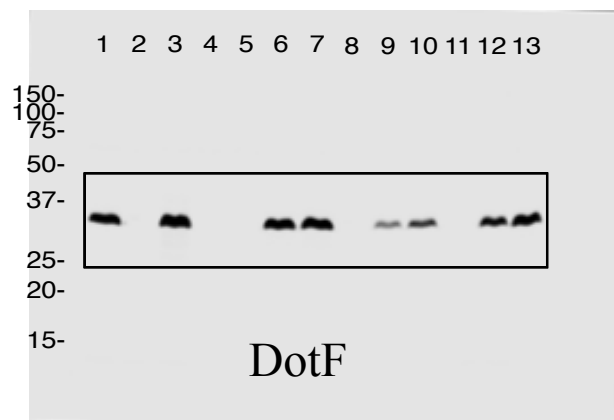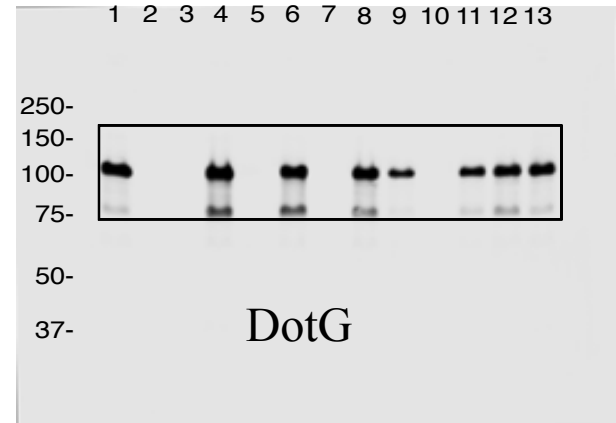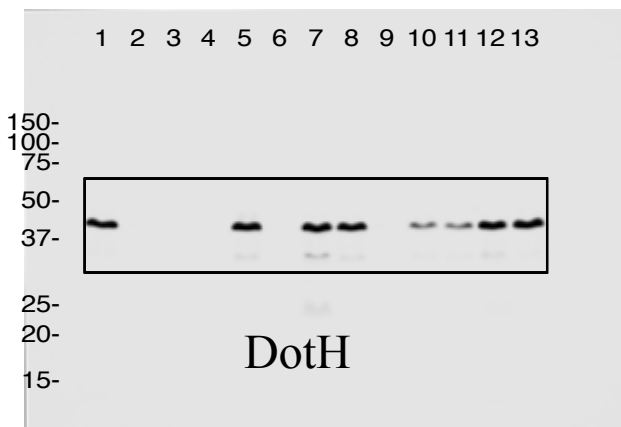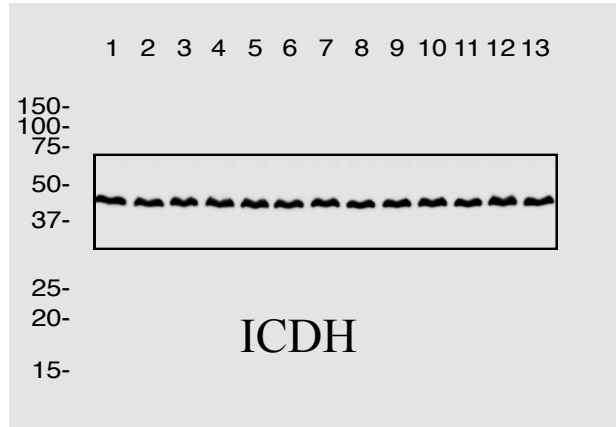

**Supplementary Figure 32M.** Full length western blots used to generate Supplementary Figure 25. Boxes represent the sections that were used.

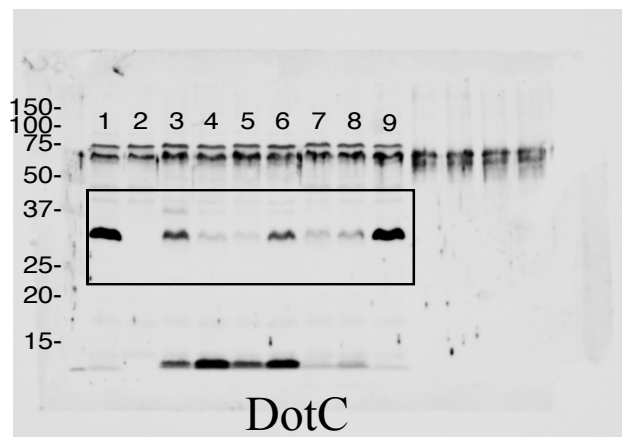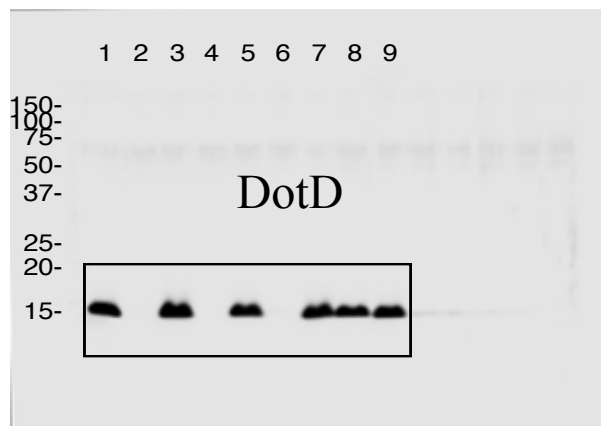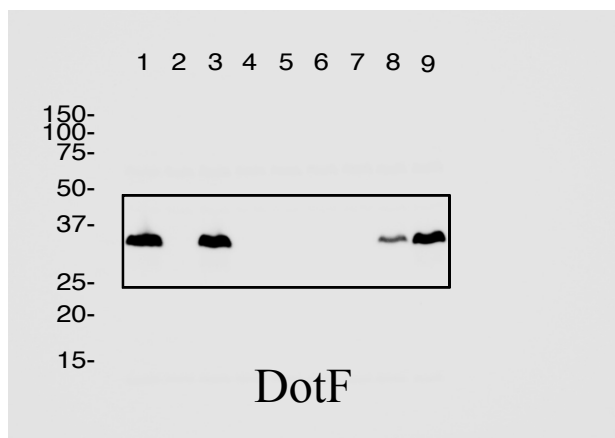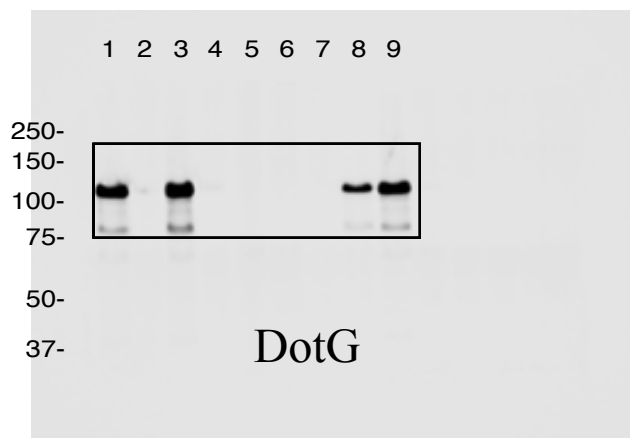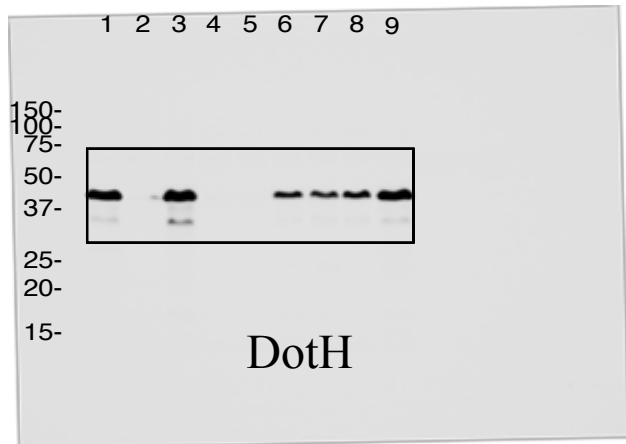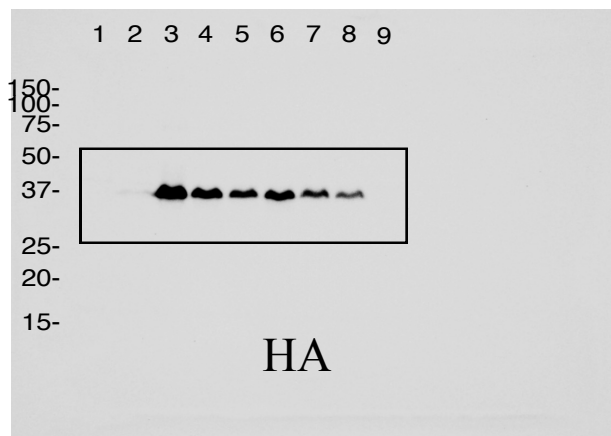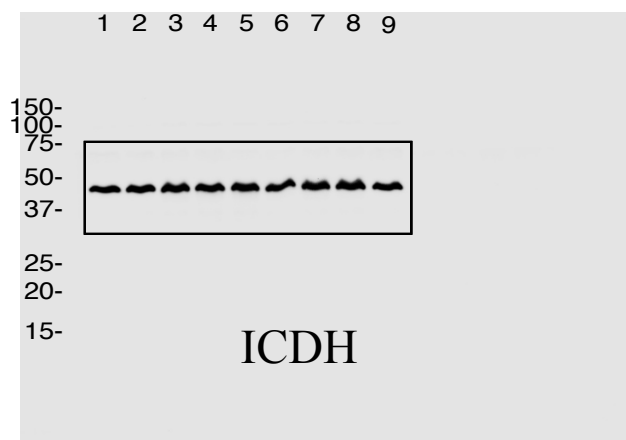

**Supplementary Figure 32N.** Full length western blots used to generate Supplementary Figure 26. Boxes represent the sections that were used.

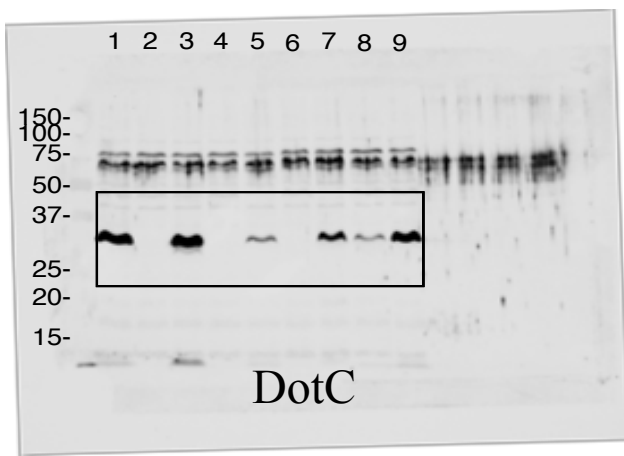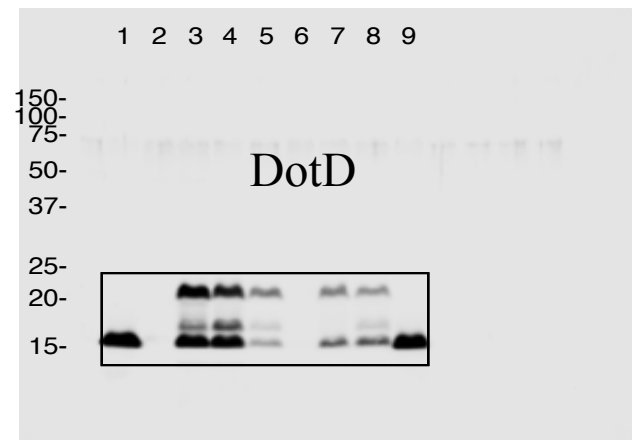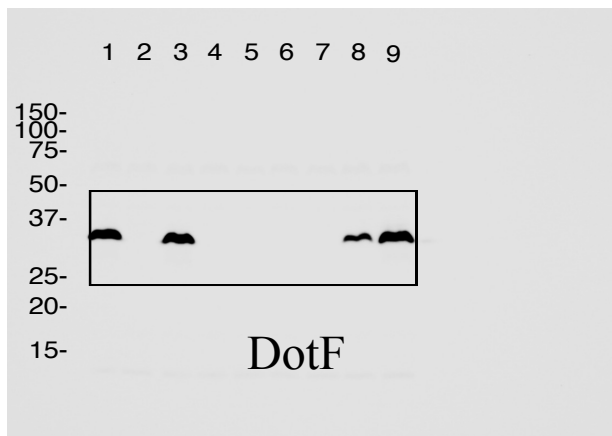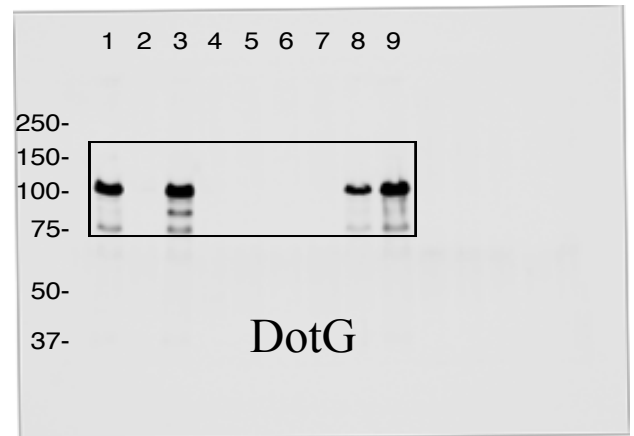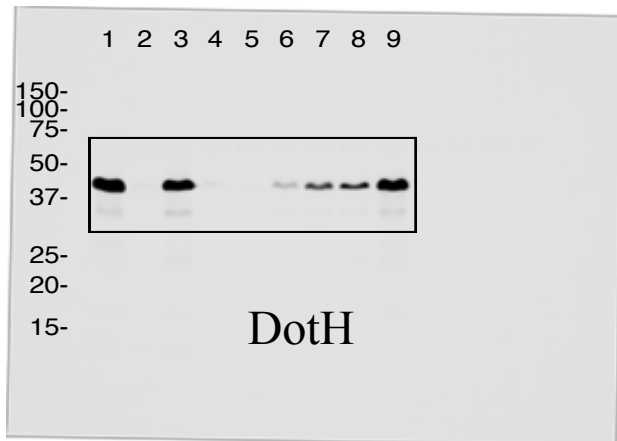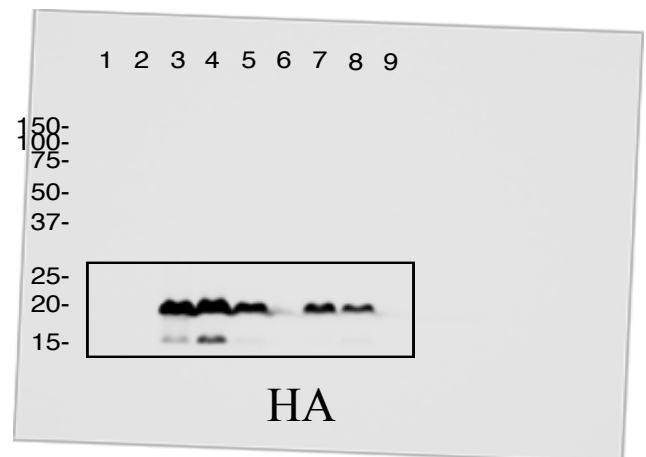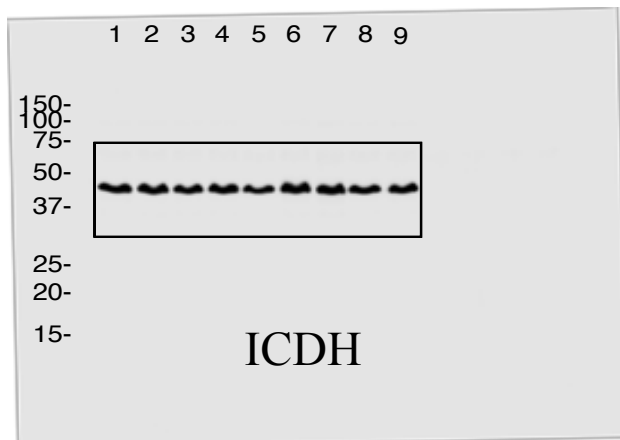

**Supplementary Figure 32O.** Full length western blots used to generate Supplementary Figure 27. Boxes represent the sections that were used.

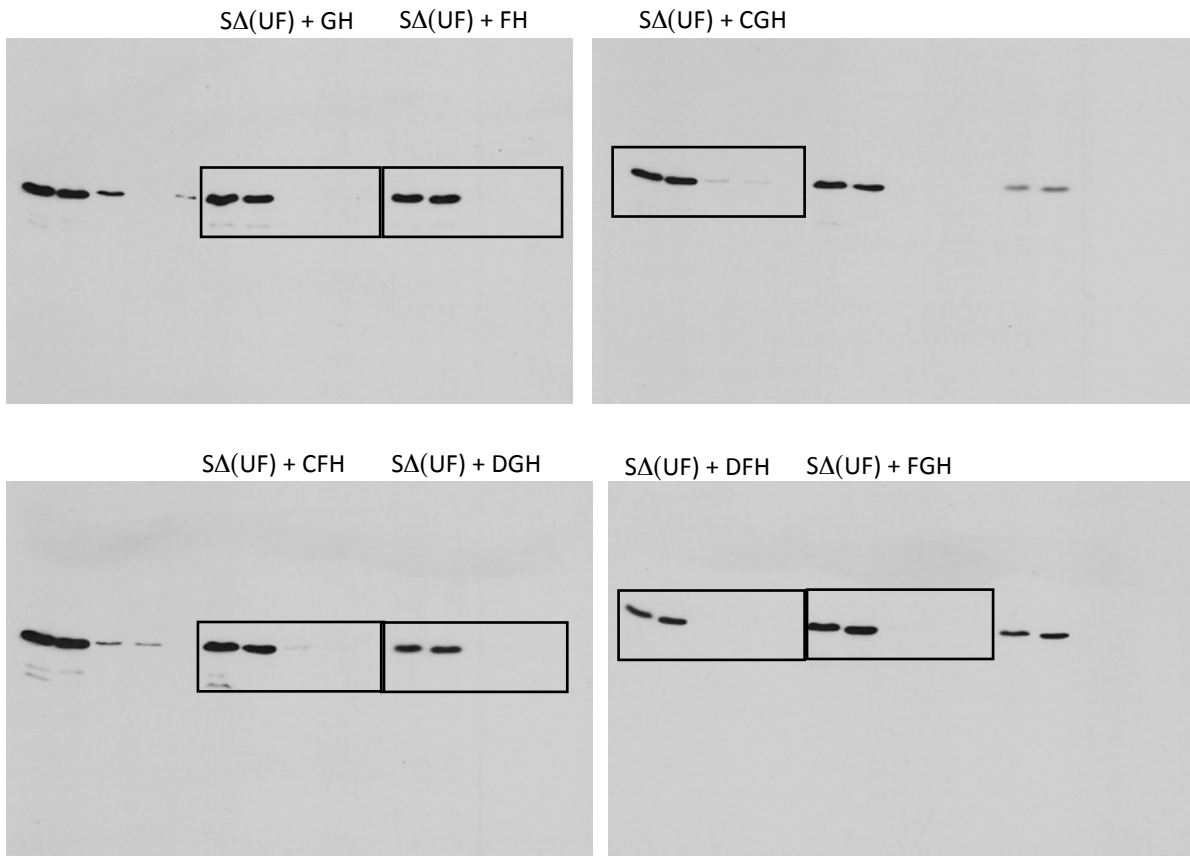

**Supplementary Figure 32P.** Full length western blots used to generate Fig. 29A. Boxes represent the sections that were used.

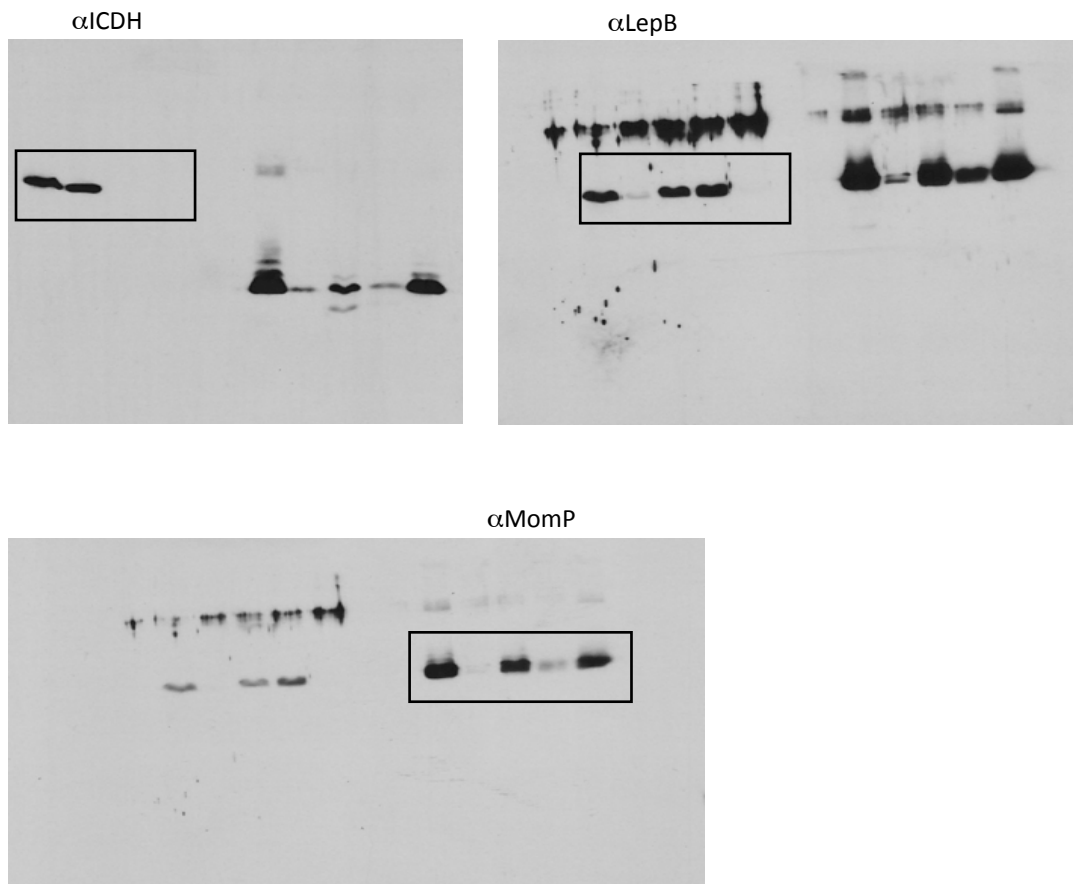

**Supplementary Figure 32Q.** Full length western blots used to generate Fig. 29B. Boxes represent the sections that were used.

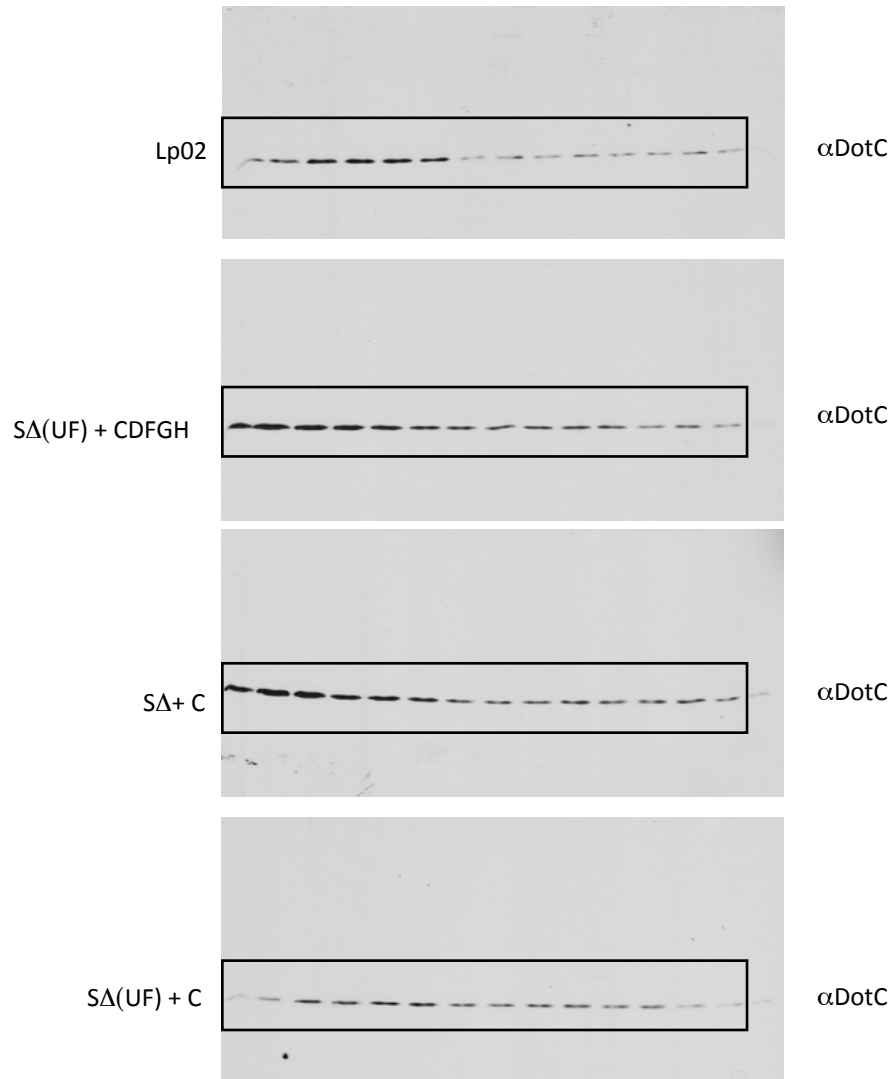

**Supplementary Figure 32R.** Full length western blots used to generate Fig. 30A. Boxes represent the sections that were used.

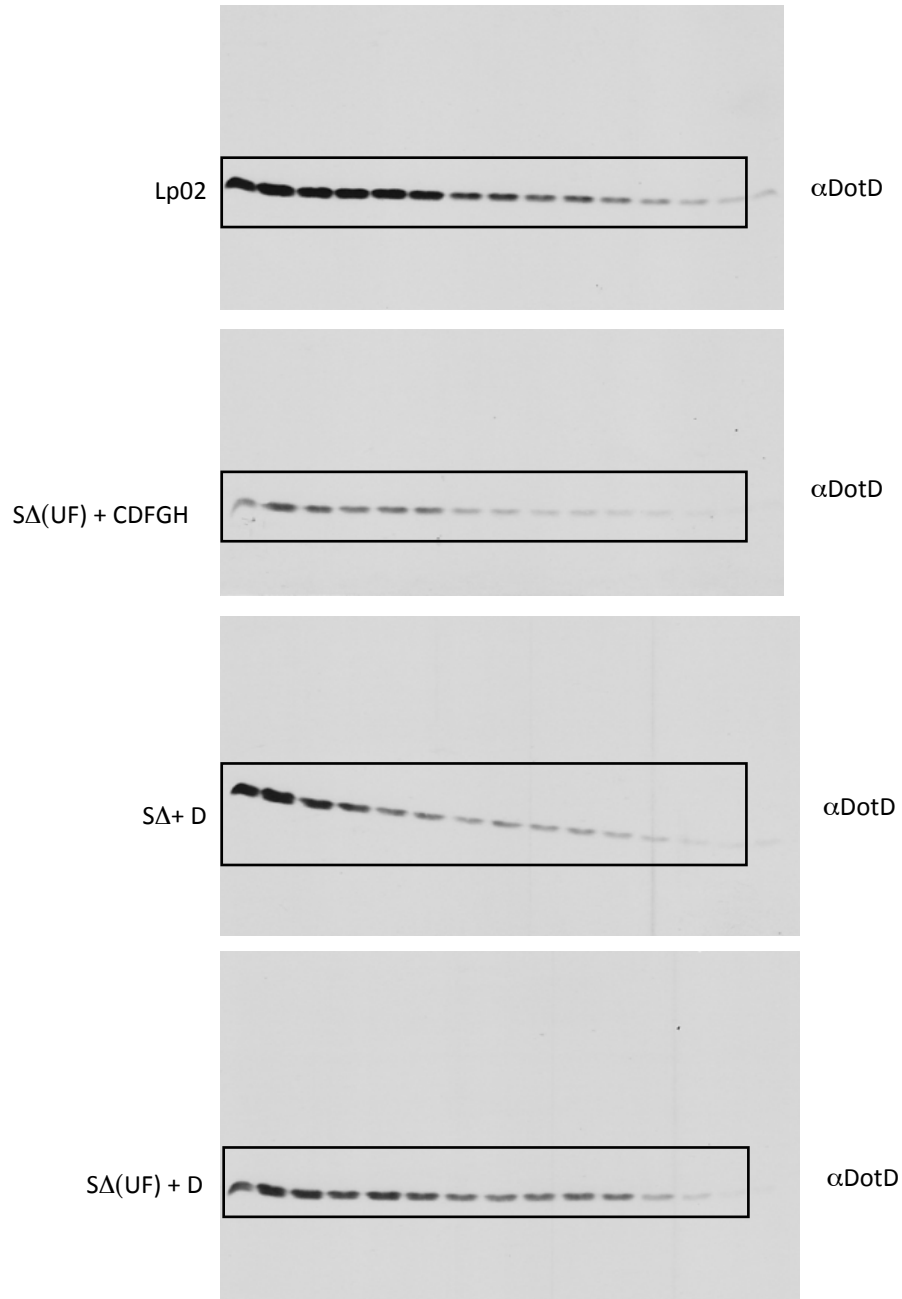

**Supplementary Figure 32S.** Full length western blots used to generate Fig. 30B. Boxes represent the sections that were used.

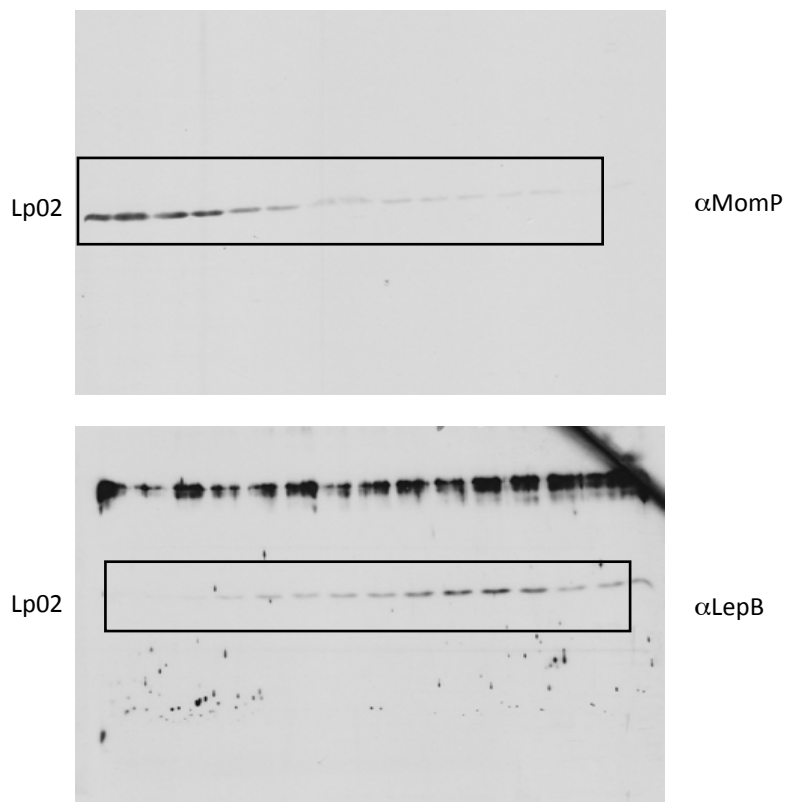

**Supplementary Figure 32T.** Full length western blots used to generate Fig. 30C. Boxes represent the sections that were used.



### **Supplementary Movie 1:**

Three dimensional representation of the Dot/Icm complex showing windowed secretion chamber (salmon:DotH, grey:DotD, green:DotK and cyan:DotC), wings (yellow:DotF), secretion channel (red:DotG) and top-view of the complex. Cytoplasmic components are not shown. In this 3D representation, IcmF, IcmX and DotA are not visible. Blue structure below the secretion channel represents DotU/IcmF seed that initiates polar Dot/Icm complex assembly.

**Supplementary Table 1.** Number of tomograms collected and T4SS particles found in different mutants.

| No | Strain name | Description                                                                  | No of tomograms collected | No of particles used for subtomogram averaging |
|----|-------------|------------------------------------------------------------------------------|---------------------------|------------------------------------------------|
| 1  | Lp02        | <i>Legionella pneumophila thyA</i> (WT)                                      | 188                       | 386                                            |
| 2  | JV4044      | <i>Legionella pneumophila thyA</i> $\Delta$ dot/icm                          | 80                        | No particle                                    |
| 3  | JV2422      | <i>Legionella pneumophila thyA</i> $\Delta$ dotA $\Delta$ dotL               | 77                        | 195                                            |
| 4  | JV3559      | <i>Legionella pneumophila thyA</i> $\Delta$ dotG                             | 164                       | 321                                            |
| 5  | JV3563      | <i>Legionella pneumophila thyA</i> $\Delta$ dotH                             | 63                        | No particle                                    |
| 6  | JV3572      | <i>Legionella pneumophila thyA</i> $\Delta$ dotD                             | 121                       | No particle                                    |
| 7  | JV3579      | <i>Legionella pneumophila thyA</i> $\Delta$ dotF                             | 181                       | 212                                            |
| 8  | JV3743      | <i>Legionella pneumophila thyA</i> $\Delta$ dotC                             | 65                        | No particle                                    |
| 9  | JV9114      | <i>Legionella pneumophila thyA</i> DotC-sfGFP                                | 117                       | 375                                            |
| 10 | JV6781      | <i>Legionella pneumophila thyA</i> $\Delta$ dotL $\Delta$ dotO $\Delta$ dotB | 109                       | 367                                            |
| 11 | JV5443      | <i>Legionella pneumophila</i> (JV4404 + dotCDFGH) + icmF/dotU                | 113                       | 261                                            |
| 12 | JV5460      | <i>Legionella pneumophila thyA</i> (JV4404 + dotCDH) + icmF/dotU             | 99                        | 201                                            |
| 13 | JV2067      | <i>Legionella pneumophila thyA</i> $\Delta$ icmX                             | 101                       | 309                                            |
| 14 | JV3588      | <i>Legionella pneumophila thyA</i> $\Delta$ dotK                             | 107                       | 244                                            |
| 15 | JV1180      | <i>Legionella pneumophila thyA</i> $\Delta$ dotU $\Delta$ icmF               | 262                       | 280                                            |
| 16 | JV1181      | <i>Legionella pneumophila thyA</i> $\Delta$ dotU $\Delta$ icmF               | 223                       | 378                                            |
| 17 | JV9082      | <i>Legionella pneumophila thyA</i> DotF-sfGFP                                | 75                        | 254                                            |

**Supplementary Table 2.** Bacterial strains and plasmids employed in this study.

| Strain, plasmid              | Relevant properties                                                       | Reference or source |
|------------------------------|---------------------------------------------------------------------------|---------------------|
| <b><i>L. pneumophila</i></b> |                                                                           |                     |
| Lp02                         | Philadelphia-1 <i>thyA</i> , <i>hsdR</i> , <i>rpsL</i>                    | 11                  |
| JV918                        | Lp02 $\Delta dotB$                                                        | 12                  |
| JV1179                       | Lp02 $\Delta icmF$                                                        | 4                   |
| JV1180                       | Lp02 $\Delta dotU \Delta icmF$                                            | 3                   |
| JV1181                       | Lp02 $\Delta dotU \Delta icmF$                                            | 3                   |
| JV1199                       | Lp02 $\Delta dotU \Delta icmF$ + pJB1191 ( <i>dotU icmF</i> )             | 3                   |
| JV1571                       | Lp02 $\Delta dotV$                                                        | 4                   |
| JV1644                       | Lp02 $\Delta dotO$                                                        | 4                   |
| JV1648                       | Lp02 $\Delta dotP$                                                        | 4                   |
| JV1928                       | Lp02 $\Delta icmQ$                                                        | 4                   |
| JV1951                       | Lp02 $\Delta icmR$                                                        | 4                   |
| JV1962                       | Lp02 $\Delta icmS$                                                        | 4                   |
| JV2064                       | Lp02 $\Delta dotA$                                                        | 4                   |
| JV2067                       | Lp02 $\Delta icmX$                                                        | 4                   |
| JV2422                       | Lp02 $\Delta dotA \Delta dotL$                                            | 13                  |
| JV2725                       | Lp02 $\Delta dotE$                                                        | 4                   |
| JV2841                       | Lp02 $\Delta lvgA$                                                        | 5                   |
| JV3559                       | Lp02 $\Delta dotG$                                                        | 4                   |
| JV3563                       | Lp02 $\Delta dotH$                                                        | 4                   |
| JV3566                       | Lp02 $\Delta icmT$                                                        | 4                   |
| JV3572                       | Lp02 $\Delta dotD$                                                        | 4                   |
| JV3579                       | Lp02 $\Delta dotF$                                                        | 4                   |
| JV3588                       | Lp02 $\Delta dotK$                                                        | 4                   |
| JV3590                       | Lp02 $\Delta dotJ$                                                        | 4                   |
| JV3596                       | Lp02 $\Delta dotI$                                                        | 4                   |
| JV3598                       | Lp02 $\Delta icmW$                                                        | 4                   |
| JV3709                       | Lp02 $\Delta icmV$                                                        | 4                   |
| JV3719                       | Lp02 $\Delta dotA \Delta dotN$                                            | 4                   |
| JV3743                       | Lp02 $\Delta dotC$                                                        | 4                   |
| JV4015                       | Lp02 $\Delta dotU$                                                        | 4                   |
| JV4044                       | Lp02 super <i>dot/icm</i> deletion $\Delta dotU \Delta icmF lvgA+$        | 4                   |
| JV4668                       | JV4044 + pJB1554 ( <i>dotG</i> )                                          | This study          |
| JV4669                       | JV4044 + pJB2121 ( <i>dotF</i> )                                          | This study          |
| JV4671                       | JV4044 + pJB1555 ( <i>dotH</i> )                                          | This study          |
| JV4694                       | JV4044 + pJB4225 ( <i>dotC:HA3X</i> )                                     | This study          |
| JV4695                       | JV4044 + pJB4223 ( <i>dotD:HA3X</i> )                                     | This study          |
| JV5263                       | $\Delta dotC$ + pJB1625 (vector)                                          | This study          |
| JV5264                       | $\Delta dotC$ + pJB4202 ( <i>dotC</i> complementing clone)                | This study          |
| JV5266                       | $\Delta dotD$ + pJB1625 (vector)                                          | This study          |
| JV5267                       | $\Delta dotD$ + pJB4204 ( <i>dotD</i> complementing clone)                | This study          |
| JV5268                       | $\Delta dotD$ + pJB4223 ( <i>dotD:HA3X</i> )                              | This study          |
| JV5319                       | Lp02 super <i>dot/icm</i> deletion <i>dotU+</i> <i>icmF+</i> <i>lvgA+</i> | 4                   |
| JV5361                       | Lp02 $\Delta dotA \Delta dotM$                                            | 4                   |

|        |                                                   |            |
|--------|---------------------------------------------------|------------|
| JV5403 | JV5319 + pJB2121 ( <i>dotF</i> )                  | This study |
| JV5404 | JV5319 + pJB1554 ( <i>dotG</i> )                  | This study |
| JV5405 | JV5319 + pJB1555 ( <i>dotH</i> )                  | This study |
| JV5406 | JV5319 + pJB4005 ( <i>dotGH</i> )                 | This study |
| JV5407 | JV5319 + pJB2123 ( <i>dotFH</i> )                 | This study |
| JV5408 | JV5319 + pJB4263 ( <i>dotFG</i> )                 | This study |
| JV5409 | JV5319 + pJB4006 ( <i>dotFGH</i> )                | This study |
| JV5439 | JV5319 + pJB4025 ( <i>dotCFGH</i> )               | This study |
| JV5441 | JV5319 + pJB4026 ( <i>dotDFGH</i> )               | This study |
| JV5442 | JV4044 + pJB4027 ( <i>dotCDFGH</i> )              | This study |
| JV5443 | JV5319 + pJB4027 ( <i>dotCDFGH</i> )              | 14         |
| JV5452 | JV5319 + pJB4409 ( <i>dotCF</i> )                 | This study |
| JV5453 | JV5319 + pJB4410 ( <i>dotDF</i> )                 | This study |
| JV5454 | JV5319 + pJB4411 ( <i>dotCDF</i> )                | This study |
| JV5455 | JV5319 + pJB4412 ( <i>dotCG</i> )                 | This study |
| JV5456 | JV5319 + pJB4413 ( <i>dotDG</i> )                 | This study |
| JV5457 | JV5319 + pJB4414 ( <i>dotCDG</i> )                | This study |
| JV5458 | JV5319 + pJB4415 ( <i>dotCH</i> )                 | This study |
| JV5459 | JV5319 + pJB4416 ( <i>dotDH</i> )                 | This study |
| JV5460 | JV5319 + pJB4417 ( <i>dotCDH</i> )                | This study |
| JV5464 | JV5319 + pJB4419 ( <i>dotCFH</i> )                | This study |
| JV5465 | JV5319 + pJB4421 ( <i>dotDFH</i> )                | This study |
| JV5466 | JV5319 + pJB4422 ( <i>dotCDFH</i> )               | This study |
| JV5467 | JV5319 + pJB4420 ( <i>dotCFG</i> )                | This study |
| JV5468 | JV5319 + pJB4423 ( <i>dotCDFG</i> )               | This study |
| JV5469 | JV5319 + pJB4019 ( <i>dotC</i> )                  | This study |
| JV5470 | JV5319 + pJB4021 ( <i>dotD</i> )                  | This study |
| JV5471 | JV5319 + pJB4023 ( <i>dotCD</i> )                 | This study |
| JV5472 | JV5319 + pJB4425 ( <i>dotDFG</i> )                | This study |
| JV5473 | JV5319 + pJB4029 ( <i>dotCGH</i> )                | This study |
| JV5474 | JV5319 + pJB4031 ( <i>dotDGH</i> )                | This study |
| JV5475 | JV5319 + pJB4033 ( <i>dotCDGH</i> )               | This study |
| JV5480 | JV5319 + pJB4225 ( <i>dotC:HA3X</i> )             | This study |
| JV5481 | JV5319 + pJB4223 ( <i>dotD:HA3X</i> )             | This study |
| JV5482 | JV5319 + pJB4546 ( <i>dotC:HA3X dotD</i> )        | This study |
| JV5483 | JV5319 + pJB4547 ( <i>dotC dotD:HA3X</i> )        | This study |
| JV5484 | $\Delta dotC$ + pJB4542 ( <i>dotC:HA3X</i> )      | This study |
| JV5486 | JV5319 + pJB4550 ( <i>dotD:HA3X dotH</i> )        | This study |
| JV5749 | JV5319 + pJB4555 ( <i>dotC:HA3X dotH</i> )        | This study |
| JV5750 | JV5319 + pJB4556 ( <i>dotC:HA3X dotD dotH</i> )   | This study |
| JV5751 | JV5319 + pJB4557 ( <i>dotC dotD:HA3X dotH</i> )   | This study |
| JV5752 | JV5319 + pJB4558 ( <i>dotC:HA3X dotD dotFGH</i> ) | This study |
| JV5753 | JV5319 + pJB4559 ( <i>dotC dotD:HA3X dotFGH</i> ) | This study |
| JV6781 | Lp02 $\Delta dotL \Delta dotO \Delta dotB$        | This study |
| JV7967 | Lp02 $\Delta dotI \Delta dotJ$                    | This study |
| JV7058 | Lp02 $\Delta dotH \Delta dotG \Delta dotF$        | This study |
| JV7091 | Lp02 $\Delta dotE \Delta dotP$                    | This study |
| JV9082 | Lp02 DotF-sfGFP integrated on chromosome          | This study |
| JV9114 | Lp02 DotC-sfGFP integrated on chromosome          | This study |

## Plasmids

|         |                                                       |            |
|---------|-------------------------------------------------------|------------|
| pJB908  | RSF1010 cloning vector                                | 12         |
| pJB1001 | $\Delta dotL$ suicide plasmid                         | 13         |
| pJB1333 | $\Delta dotO$ suicide plasmid                         | 4          |
| pJB1554 | pJB908 with <i>dotG</i>                               | 3          |
| pJB1555 | pJB908 with <i>dotH</i>                               | 3          |
| pJB2121 | pJB908 with <i>dotF</i>                               | 3          |
| pJB2123 | pJB908 with <i>dotFH</i>                              | This study |
| pJB4005 | pJB908 with <i>dotGH</i>                              | This study |
| pJB4006 | pJB908 with <i>dotFGH</i>                             | This study |
| pJB4019 | pJB908 with <i>dotC</i>                               | This study |
| pJB4021 | pJB908 with <i>dotD</i>                               | This study |
| pJB4023 | pJB908 with <i>dotCD</i>                              | This study |
| pJB4025 | pJB908 with <i>dotCFGH</i>                            | This study |
| pJB4026 | pJB908 with <i>dotDFGH</i>                            | This study |
| pJB4027 | pJB908 with <i>dotCDFGH</i>                           | This study |
| pJB4029 | pJB908 with <i>dotCGH</i>                             | This study |
| pJB4031 | pJB908 with <i>dotDGH</i>                             | This study |
| pJB4033 | pJB908 with <i>dotCDGH</i>                            | This study |
| pJB4223 | pJB908 with <i>dotD:HA3X</i>                          | This study |
| pJB4225 | pJB908 with <i>dotC:HA3X</i>                          | This study |
| pJB4263 | pJB908 with <i>dotFG</i>                              | This study |
| pJB4409 | pJB908 with <i>dotCF</i>                              | This study |
| pJB4410 | pJB908 with <i>dotDF</i>                              | This study |
| pJB4411 | pJB908 with <i>dotCDF</i>                             | This study |
| pJB4412 | pJB908 with <i>dotCG</i>                              | This study |
| pJB4413 | pJB908 with <i>dotDG</i>                              | This study |
| pJB4414 | pJB908 with <i>dotCDG</i>                             | This study |
| pJB4415 | pJB908 with <i>dotCH</i>                              | This study |
| pJB4416 | pJB908 with <i>dotDH</i>                              | This study |
| pJB4417 | pJB908 with <i>dotCDH</i>                             | This study |
| pJB4419 | pJB908 with <i>dotCFH</i>                             | This study |
| pJB4420 | pJB908 with <i>dotCFG</i>                             | This study |
| pJB4421 | pJB908 with <i>dotDFH</i>                             | This study |
| pJB4422 | pJB908 with <i>dotCDFH</i>                            | This study |
| pJB4423 | pJB908 with <i>dotCDFG</i>                            | This study |
| pJB4425 | pJB908 with <i>dotDFG</i>                             | This study |
| pJB4546 | pJB908 with <i>dotC:HA3X dotD</i>                     | This study |
| pJB4547 | pJB908 with <i>dotC dotD:HA3X</i>                     | This study |
| pJB4550 | pJB908 with <i>dotD:HA3X dotH</i>                     | This study |
| pJB4555 | pJB908 with <i>dotC:HA3X dotH</i>                     | This study |
| pJB4556 | pJB908 with <i>dotC:HA3X dotD dotH</i>                | This study |
| pJB4557 | pJB908 with <i>dotC dotD:HA3X dotH</i>                | This study |
| pJB4558 | pJB908 with <i>dotC:HA3X dotD dotFGH</i>              | This study |
| pJB4559 | pJB908 with <i>dotC dotD:HA3X dotFGH</i>              | This study |
| pJB5184 | $\Delta dotH \Delta dotG \Delta dotF$ suicide plasmid | This study |
| pJB5185 | $\Delta dotE \Delta dotP$ suicide plasmid             | This study |
| pJB6162 | $\Delta dotJ \Delta dotI$ suicide plasmid             | This study |

|         |                                   |            |
|---------|-----------------------------------|------------|
| pJB7255 | DotF-sfGFP integration plasmid    | This study |
| pJB7264 | DotC-sfGFP with SacB/CmR cassette | This study |
| pJB7283 | DotC-sfGFP integration plasmid    | This study |
| pSR47S  | R6K suicide vector                | 15         |

## Supplementary References

- 1 Kucukelbir, A., Sigworth, F. J. & Tagare, H. D. Quantifying the local resolution of cryo-EM density maps. *Nat Methods* **11**, 63-65, doi:10.1038/nmeth.2727 (2014).
- 2 Jeong, K. C., Ghosal, D., Chang, Y.-W., Jensen, G. J. & Vogel, J. P. Polar delivery of *Legionella* type IV secretion system substrates is essential for virulence. *Proceedings of the National Academy of Sciences* **114**, 8077-8082, doi:10.1073/pnas.1621438114 (2017).
- 3 Sexton, J. A., Miller, J. L., Yoneda, A., Kehl-Fie, T. E. & Vogel, J. P. *Legionella pneumophila* DotU and IcmF are required for stability of the Dot/Icm complex. *Infect Immun* **72**, 5983-5992 (2004).
- 4 Vincent, C. D. *et al.* Identification of the core transmembrane complex of the *Legionella* Dot/Icm type IV secretion system. *Mol Microbiol* **62**, 1278-1291 (2006).
- 5 Vincent, C. D. & Vogel, J. P. The *Legionella pneumophila* IcmS-LvgA protein complex is important for Dot/Icm-dependent intracellular growth. *Mol Microbiol* **61**, 596-613, doi:10.1111/j.1365-2958.2006.05243.x (2006).
- 6 Kelley, L. A., Mezulis, S., Yates, C. M., Wass, M. N. & Sternberg, M. J. E. The Phyre2 web portal for protein modeling, prediction and analysis. *Nature Protocols* **10**, 845-858, doi:10.1038/nprot.2015.053 (2015).
- 7 Yang, J. *et al.* The I-TASSER Suite: protein structure and function prediction. *Nature Methods* **12**, 7-8, doi:10.1038/nmeth.3213 (2015).
- 8 Xu, D. & Zhang, Y. Ab initio protein structure assembly using continuous structure fragments and optimized knowledge-based force field. *Proteins* **80**, 1715-1735, doi:10.1002/prot.24065 (2012).
- 9 Low, H. H. *et al.* Structure of a type IV secretion system. *Nature* **508**, 550-553, doi:10.1038/nature13081 (2014).
- 10 Chetrit, D., Hu, B., Christie, P. J., Roy, C. R. & Liu, J. A unique cytoplasmic ATPase complex defines the *Legionella pneumophila* type IV secretion channel. *Nat Micro*, doi:doi:10.1038/s41564-018-0165-z (2018).
- 11 Berger, K. H. & Isberg, R. R. Two distinct defects in intracellular growth complemented by a single genetic locus in *Legionella pneumophila*. *Mol Microbiol* **7**, 7-19 (1993).
- 12 Sexton, J. A. *et al.* The *Legionella pneumophila* PilT homologue DotB exhibits ATPase activity that is critical for intracellular growth. *J Bacteriol* **186**, 1658-1666 (2004).
- 13 Buscher, B. A. *et al.* The DotL protein, a member of the TraG-coupling protein family, is essential for viability of *Legionella pneumophila* strain Lp02. *J Bacteriol* **187**, 2927-2938, doi:10.1128/JB.187.9.2927-2938.2005 (2005).
- 14 Ghosal, D., Chang, Y. W., Jeong, K. C., Vogel, J. P. & Jensen, G. J. In situ structure of the *Legionella* Dot/Icm type IV secretion system by electron cryotomography. *EMBO Rep* **18**, 726-732, doi:10.15252/embr.201643598 (2017).
- 15 Merriam, J. J., Mathur, R., Maxfield-Boumil, R. & Isberg, R. R. Analysis of the *Legionella pneumophila* *fliI* gene: intracellular growth of a defined mutant defective for flagellum biosynthesis. *Infect Immun* **65**, 2497-2501 (1997).
